# Supplementary material for: Comparative Metabolic Profiling of Grape Skin Tissue along Grapevine Berry Developmental Stages Reveals Systematic Influences of Root Restriction on Skin Metabolome
Source: Int J Mol Sci. 2019 Jan 28;20(3):534. doi: 10.3390/ijms20030534 (PMC6386830; doi:10.3390/ijms20030534)
Supplement: Supplementary file 1 [file ijms-20-00534-s001.zip › Supplementary Table-revision.xlsx]

## Sheet: Table S1
Supplementary Table S1. List of metabolites annotated in developing grape skin
Formula	Metabolite Name	Abbreviation of Compound Name		KEGG_ID	Mass	RT(min)	Ion mode	Class
C20H37NO2	linoleoyl ethanolamide #1	Lin eth #1	M3	/	323.281	16.51	pos	Amines
C20H35NO2	linoleoyl ethanolamide #2	Lin eth #2	M2	/	321.267	15.44	pos	Amines
C23H27N3O15S	caftaric acid-glutathione	Caftaric Acid-GSH	M4	/	617.117	4.5	neg	Amino acid derivatives
C9H21N2O2	trimethyllysine	TrimetLys	M5	C03793	189.16	4.48	pos	Amino acid derivatives
C7H14N2O4	2,6-diaminopimelic acid	2,6-DAP	M16	C00666	190.095	1.72	pos	Amino acids, peptides, and analogues
C6H11NO4	2-aminoadipic acid	2-Aminoadipic Acid	M39	C00956	161.069	1.94	pos	Amino acids, peptides, and analogues
C6H11NO3	4-acetamidobutanoate	4-Acmidobutanoate	M38	C02946	145.074	2.49	neg	Amino acids, peptides, and analogues
C3H7NO2	alanine	Ala	M25	C00041	89.048	2.49	neg	Amino acids, peptides, and analogues
C6H14N4O2	arginine	Arg	M15	C00062	174.112	1.51	neg	Amino acids, peptides, and analogues
C10H18N4O6	argininosuccinate	ArgSuc	M20	C03406	290.122	1.88	neg	Amino acids, peptides, and analogues
C4H8N2O3	asparagine	Asn	M27	C00152	132.053	1.53	neg	Amino acids, peptides, and analogues
C4H7NO4	aspartate	Asp	M8	C00049	133.038	1.57	pos	Amino acids, peptides, and analogues
C5H12NO2	betaine	Bet	M11	C00719	118.086	1.67	pos	Amino acids, peptides, and analogues
C6H13N3O3	citrulline	Citr	M40	C00327	175.092	1.65	pos	Amino acids, peptides, and analogues
C3H7NO2S	cysteine	Cys	M7	C00097	121.019	1.87	neg	Amino acids, peptides, and analogues
C4H9NO2	gamma-aminobutyrate (GABA)	GABA	M28	C00334	103.064	1.63	pos	Amino acids, peptides, and analogues
C5H11N3O2	gamma-guanidinobutyric acid	γ-GBH	M9	C01035	145.085	2.45	pos	Amino acids, peptides, and analogues
C5H9NO4	glutamic acid	Glu	M36	C00217	147.053	1.96	neg	Amino acids, peptides, and analogues
C5H10N2O3	glutamine	Gln	M31	C00064	146.069	1.79	pos	Amino acids, peptides, and analogues
C11H20N2O5	glutamyl-leucine	Glu-Leu	M22	/	260.135	4.9	pos	Amino acids, peptides, and analogues
C20H32N6O12S2	glutathione (oxidized)	GSSG	M23	C00127	612.152	3.78	pos	Amino acids, peptides, and analogues
C10H17N3O6S	glutathione (reduced)	GSH	M6	C00051	307.084	2.62	neg	Amino acids, peptides, and analogues
C2H5NO2	glycine	Gly	M24	C00037	75.032	1.54	pos	Amino acids, peptides, and analogues
C6H9N3O2	histidine	His	M45	C00135	155.069	1.51	neg	Amino acids, peptides, and analogues
C4H9NO3	homoserine	HSer	M30	C00263	119.057	1.6	pos	Amino acids, peptides, and analogues
C6H13NO2	isoleucine	Ile	M41	C00407	131.095	3.85	neg	Amino acids, peptides, and analogues
C6H13NO2	leucine	Leu	M42	C00123	131.095	3.96	neg	Amino acids, peptides, and analogues
C6H14N2O2	lysine	Lys	M14	C00047	146.106	1.44	pos	Amino acids, peptides, and analogues
C5H11NO2S	methionine	Met	M33	C00073	149.051	2.52	pos	Amino acids, peptides, and analogues
C8H8O2	methylbenzoate	Methylbenzoate	M53	C07211	136.052	4.4	pos	Amino acids, peptides, and analogues
C8H16N2O3	N6-acetyllysine	N6-AcLys	M52	C02727	188.116	2.43	pos	Amino acids, peptides, and analogues
C6H10N2O4	N-acetylasparagine	N-AcAsp	M13	/	174.067	4.38	pos	Amino acids, peptides, and analogues
C7H11NO5	N-acetylglutamate	N-AcGlu	M47	C00624	189.064	3.62	pos	Amino acids, peptides, and analogues
C8H15NO3	N-acetylisoleucine	N-AcIsoleu	M51	/	173.105	5.83	neg	Amino acids, peptides, and analogues
C8H15NO3	N-acetylleucine	N-AcLeu	M17	/	173.105	5.93	neg	Amino acids, peptides, and analogues
C7H13NO3S	N-acetylmethionine	N-AcMet	M48	C02712	191.061	5.18	neg	Amino acids, peptides, and analogues
C7H11NO3	N-acetylproline	N-AcPro	M46	/	157.074	4.93	neg	Amino acids, peptides, and analogues
C5H11NO2	norvaline	Norvaline	M32	C01799	117.079	2.3	pos	Amino acids, peptides, and analogues
C5H12N2O2	ornithine	Orn	M34	C00077	132.09	1.51	neg	Amino acids, peptides, and analogues
C9H11NO2	phenylalanine	Phe	M54	C00079	165.079	4.48	neg	Amino acids, peptides, and analogues
C6H11NO2	pipecolic acid	Pip	M37	C00408	129.08	2.41	pos	Amino acids, peptides, and analogues
C5H9NO2	proline	Pro	M12	C00148	115.063	1.75	neg	Amino acids, peptides, and analogues
C5H7NO3	pyroglutamic acid	Pyr	M35	C01879	129.041	1.58	pos	Amino acids, peptides, and analogues
C3H7NO3	serine	Ser	M26	C00065	105.043	1.53	neg	Amino acids, peptides, and analogues
C4H9NO2S	S-methylcysteine	S-MetCys	M29	/	135.035	1.88	pos	Amino acids, peptides, and analogues
C6H13NO2S	S-Methylmethionine	S-MetMet	M43	C04078	163.066	3.94	pos	Amino acids, peptides, and analogues
C7H19N3	spermidine	Spe	M49	C00315	145.158	1.29	pos	Amino acids, peptides, and analogues
C8H18N4O2	symmetric dimethylarginine	S-Dimethyl arg	M18	/	202.143	1.74	pos	Amino acids, peptides, and analogues
C6H6N2O2	trans-urocanate	Trans-Urocanate	M44	C00785	138.043	1.51	neg	Amino acids, peptides, and analogues
C11H12N2O2	tryptophan	Trp	M21	C00078	204.09	5	neg	Amino acids, peptides, and analogues
C8H11NO	tyramine	Tya	M50	C00483	137.083	3.93	pos	Amino acids, peptides, and analogues
C9H11NO3	tyrosine	Tyr	M19	C00082	181.074	3.85	pos	Amino acids, peptides, and analogues
C5H11NO2	valine	Val	M10	C00183	117.079	2.11	pos	Amino acids, peptides, and analogues
C7H6O2	2-hydroxybenzaldehyde	2-HBA	M60	C06202	122.037	6.45	neg	Benzene and substituted derivatives
C8H8O3	3-cresotinic acid	3-Cresotinic Acid	M63	C14088	152.047	8.86	neg	Benzene and substituted derivatives
C6H5NO3	4-Nitrophenol	4-Nitrophenol	M58	C00870	139.027	7.97	neg	Benzene and substituted derivatives
C7H6O2	benzoic acid	Benzoic Acid	M59	C00180	122.037	5.73	neg	Benzene and substituted derivatives
C7H6O5	gallic acid	Gallic Acid	M62	C01424	170.021	4.29	neg	Benzene and substituted derivatives
C13H16O8	hydroxybenzoic acid-O-hexoside	HBA-O-hex	M55	/	300.084	4.77	neg	Benzene and substituted derivatives
C7H6O4	protocatechuic acid	Procat	M61	C00230	154.026	6.11	neg	Benzene and substituted derivatives
C13H16O9	protocatechuic Acid O-hexoside #1	Procat-O-hex #1	M56	/	316.079	4.24	neg	Benzene and substituted derivatives
C13H16O9	protocatechuic Acid O-hexoside #2	Procat-O-hex #2	M57	/	316.079	4.56	neg	Benzene and substituted derivatives
C9H10O5	syringic acid	Syringic acid	M65	C10833	198.05	5.62	pos	Benzene and substituted derivatives
C8H8O4	vanillate	Vanillate	M64	C06672	168.042	6.98	neg	Benzene and substituted derivatives
C18H32O16	1-kestose	1-kestose	M90	/	504.169	2.48	neg	Carbohydrates and carbohydrate conjugates
C16H20O9	1-O-Feruloyl-β-D-glucose	1O-Fer-glu	M85	C17759	356.111	5.34	neg	Carbohydrates and carbohydrate conjugates
C17H22O10	1-O-Sinapoyl-β-D-glucose #1	1O-Sin-glu #1	M86	C01175	386.121	5.07	neg	Carbohydrates and carbohydrate conjugates
C17H22O10	1-O-Sinapoyl-β-D-glucose #2	1O-Sin-glu #2	M68	C01175	386.121	5.3	neg	Carbohydrates and carbohydrate conjugates
C17H22O10	1-O-Sinapoyl-β-D-glucose #3	1O-Sin-glu #3	M87	C01175	386.121	5.41	neg	Carbohydrates and carbohydrate conjugates
C11H15N5O3S	5'-deoxy-5'-(methylthio)adenosine	5'-deoxy-5'-met ade	M66	C00170	297.09	4.79	pos	Carbohydrates and carbohydrate conjugates
C6H10O4	adipic acid	Adipic acid	M76	C06104	146.058	4.08	neg	Carbohydrates and carbohydrate conjugates
C5H10O5	arabinose	Ara	M72	C00216	150.052	1.87	neg	Carbohydrates and carbohydrate conjugates
C5H6O4	citraconate	Citraconate	M73	C02226	130.026	1.87	neg	Carbohydrates and carbohydrate conjugates
C5H8O5	citramalic acid	Citramalic acid	M75	C00815	148.037	3.88	neg	Carbohydrates and carbohydrate conjugates
C6H8O7	citrate	Cit	M82	C00158	192.027	2.25	neg	Carbohydrates and carbohydrate conjugates
C5H8O4	dimethyl malonate	Dimethyl malonate	M74	/	132.042	4.41	neg	Carbohydrates and carbohydrate conjugates
C6H12O6	fructose	Fru	M97	C00095	180.064	1.55	pos	Carbohydrates and carbohydrate conjugates
C6H13O9P	fructose 6-phosphate	F6P	M81	C00085	260.03	1.8	pos	Carbohydrates and carbohydrate conjugates
C6H12O7	gluconic acid	Gluconic acid	M78	C00257	196.058	1.9	neg	Carbohydrates and carbohydrate conjugates
C6H13NO5	glucosamine	Glucosamine	M79	C00329	179.08	1.68	pos	Carbohydrates and carbohydrate conjugates
C6H13NO6	glucosaminic acid	GAA	M99	C03752	195.07	1.53	neg	Carbohydrates and carbohydrate conjugates
C6H12O6	glucose	Glucose	M98	C00031	180.063	1.87	neg	Carbohydrates and carbohydrate conjugates
C6H13O9P	glucose 6-phosphate	G6P	M80	C00092	260.03	1.62	pos	Carbohydrates and carbohydrate conjugates
C3H6O3	glyceraldehyde	Glyceral	M95	C00577	90.032	1.82	pos	Carbohydrates and carbohydrate conjugates
C3H6O4	glycerate	Glycerate	M71	C00258	106.026	1.76	neg	Carbohydrates and carbohydrate conjugates
C2H4O3	glycolate (hydroxyacetate)	Gly-OH	M92	C00160	76.016	1.87	neg	Carbohydrates and carbohydrate conjugates
C6H8O7	isocitrate	Ice	M100	C00311	192.027	2.02	neg	Carbohydrates and carbohydrate conjugates
C36H62O31	maltohexaose	Mth	M70	C01936	990.324	1.81	pos	Carbohydrates and carbohydrate conjugates
C24H42O21	maltotetraose	Mtt	M69	C02052	666.22	2.49	pos	Carbohydrates and carbohydrate conjugates
C18H32O16	maltotriose	Mat	M89	C01835	504.169	2.29	neg	Carbohydrates and carbohydrate conjugates
C7H14O6	methyl-alpha-glucopyranoside	αMGP	M101	C02603	194.079	1.88	neg	Carbohydrates and carbohydrate conjugates
C3H4O3	pyruvate	Pyruvate	M94	C00022	88.016	2.13	pos	Carbohydrates and carbohydrate conjugates
C18H32O16	raffinose	Raffinose	M88	C00492	504.165	1.86	neg	Carbohydrates and carbohydrate conjugates
C6H12O5	rhamnose	Rhamnose	M77	C00507	164.067	2.49	neg	Carbohydrates and carbohydrate conjugates
C24H42O21	stachyose	Stachyose	M91	C01613	666.227	1.67	pos	Carbohydrates and carbohydrate conjugates
C12H22O11	sucrose	Sucrose	M83	C00089	342.116	1.83	neg	Carbohydrates and carbohydrate conjugates
C12H22O11	trehalose	Tre	M202	C01083	342.116	1.95	pos	Carbohydrates and carbohydrate conjugates
C15H24N2O17P2	UDP-glucose	UDP-G	M67	C00029	566.055	1.98	neg	Carbohydrates and carbohydrate conjugates
C30H52O26	verbascose	Ver	M93	C08252	828.268	2.5	neg	Carbohydrates and carbohydrate conjugates
C5H6O5	alpha-ketoglutarate	α-ketoglu	M96	C00026	146.021	2.31	neg	Carbohydrates and carbohydrate conjugates
C17H20O9	3-O-feruloylquinic acid	3O-fer	M114	C02572	368.109	5.46	pos	Cinnamic acids and derivatives
C9H8O4	caffeic acid	Caffeic acid	M116	C01197	180.042	6.32	neg	Cinnamic acids and derivatives
C15H18O9	caffeic acid-O-hexoside #1	Caf-O-hex #1	M112	C10431	342.096	4.76	neg	Cinnamic acids and derivatives
C15H18O9	caffeic acid-O-hexoside #2	Caf-O-hex #2	M113	C10431	342.095	5.14	neg	Cinnamic acids and derivatives
C13H12O9	caffeoyltartaric acid	Caf-tar	M109	/	312.048	5.01	neg	Cinnamic acids and derivatives
C12H14O5	cis-3,4,5-trimethoxycinnamic acid	Cis-TMCA	M107	/	238.084	6.8	neg	Cinnamic acids and derivatives
C15H18O8	coumaric acid hexoside	Cou-hex	M111	/	326.1	5.24	neg	Cinnamic acids and derivatives
C10H10O4	ferulate	Ferulate	M105	C01494	194.057	6.42	neg	Cinnamic acids and derivatives
C9H8O3	o-coumaric acid	o-coumaric acid	M115	C01772	164.047	5.24	neg	Cinnamic acids and derivatives
C9H8O3	p-coumaric acid	p-coumaric acid	M104	C00811	164.047	5.44	neg	Cinnamic acids and derivatives
C16H18O8	p-coumaroyl quinic acid	P-co-qui	M103	C12208	338.103	5.28	pos	Cinnamic acids and derivatives
C13H12O8	p-coumaroyl tartaric acid	P-co-tar	M108	/	296.053	5.44	neg	Cinnamic acids and derivatives
C13H16O8	salicylic acid 2-C-β-D-glucopyranoside	SA-2C-glu	M102	/	300.083	4.96	neg	Cinnamic acids and derivatives
C13H16O8	salicylic acid 2-O-β-D-glucopyranoside	SA-2O-glu	M110	/	300.084	5.13	neg	Cinnamic acids and derivatives
C11H12O5	sinapic acid #1	sinapic acid #1	M106	C00482	224.069	5.43	pos	Cinnamic acids and derivatives
C9H8O3	trans-2-Hydroxycinnamate	Trans-2-OH-cin	M281	C01772	164.048	3.85	pos	Cinnamic acids and derivatives
C6H8O6	ascorbate (Vitamin C)	VC	M123	C00072	176.032	2.51	neg	Cofactors, Prosthetic Groups, Electron Carriers
C6H6N2O	nicotinamide	NicA	M117	C00153	122.048	2.59	pos	Cofactors, Prosthetic Groups, Electron Carriers
C6H5NO2	nicotinate	Nicotinate	M122	C00253	123.032	2.48	neg	Cofactors, Prosthetic Groups, Electron Carriers
C9H17NO5	pantothenate	Pantothenate	M127	C00864	219.11	4.57	neg	Cofactors, Prosthetic Groups, Electron Carriers
C35H36N4O5	pheophorbide A	Pheophorbide A	M120	C18021	592.268	19.33	neg	Cofactors, Prosthetic Groups, Electron Carriers
C8H9NO3	pyridoxal	Pyridoxal	M118	C00250	167.059	4.21	pos	Cofactors, Prosthetic Groups, Electron Carriers
C8H12N2O2	pyridoxamine (vitamin B6)	Pyridoxamine(VB6)	M126	C00534	168.091	5.01	pos	Cofactors, Prosthetic Groups, Electron Carriers
C8H11NO3	pyridoxine (vitamin B6)	Pyridoxine (VB6)	M125	C00314	169.073	2.49	pos	Cofactors, Prosthetic Groups, Electron Carriers
C17H20N4O6	riboflavin (vitamin B2)	VB2	M119	C00255	376.137	5.05	neg	Cofactors, Prosthetic Groups, Electron Carriers
C4H8O5	threonate	Threonate	M121	C01620	136.037	1.72	pos	Cofactors, Prosthetic Groups, Electron Carriers
C7H7NO2	trigonelline (N'-methylnicotinate)	Meth-Nic	M124	C01004	137.048	1.76	pos	Cofactors, Prosthetic Groups, Electron Carriers
C20H16O13	ellagic acid hexoside	Ela-hex	M129	/	464.059	5.31	neg	Ellagic acd and conjugates
C19H14O12	ellagic acid xyloside	Ela-xyl	M128	/	434.048	5.65	neg	Ellagic acd and conjugates
C12H22O8	hydroxy-hexanoate-glucoside	OH-hex-glc	M131	/	294.131	5.18	neg	Fatty Acyls
C5H6O4	itaconic acid	IA	M133	C00490	130.026	2.49	neg	Fatty Acyls
C5H8O4	methylsuccinic acid	Met-suc	M130		132.042	4.78	neg	Fatty Acyls
C18H35NO	oleamide	Oleamide	M132	C19670	281.272	18.43	pos	Fatty Acyls
C25H26O13	apigenin 6-C-α-L-arabinosyl-8-C-β-L-arabinoside	Api-6C-ara-8C-ara	M184	/	534.138	5.7	neg	Flavonoids
C21H22O11	astilbin #1	Astilbin #1	M172	C17449	450.116	5.41	neg	Flavonoids
C21H22O11	astilbin #2	Astilbin #2	M173	C17449	450.116	5.59	neg	Flavonoids
C21H22O11	astilbin #3	Astilbin #3	M139	C17449	450.116	5.84	neg	Flavonoids
C15H14O6	Catechin	Catechin	M150	C06562	290.079	5.37	neg	Flavonoids
C21H22O10	chalcone 2'-O-glucoside	Cha-2'O-glc	M171	C16406	434.121	6.53	neg	Flavonoids
C23H24O11	C-hexosyl-methylchrysoeriol	C-hex-met chy	M182	/	476.135	6.11	pos	Flavonoids
C22H22O11	chrysoeriol C-glucoside #1	Chr-C-glc #2	M177	C05990	462.116	5.77	pos	Flavonoids
C22H22O11	chrysoeriol C-glucoside #2	Chy-C-glc #1	M142	C05990	462.116	5.48	neg	Flavonoids
C22H22O11	chrysoeriol-O-hexoside	Chy-O-hex	M178	/	462.116	6.41	neg	Flavonoids
C30H27O14	cyanidin 3-O-(6''-caffeoyl-glucoside) #1	Cy-3O-6''-caf-glc #1	M196	C16369	611.14	4.15	pos	Flavonoids
C30H27O14	cyanidin 3-O-(6''-caffeoyl-glucoside) #2	Cy-3O-6''-caf-glc #2	M197	C16369	611.139	4.47	pos	Flavonoids
C21H21O11	cyanidin-3-O-glucoside #1	Cy-3O-glc #1	M167	C08604	449.108	6.03	pos	Flavonoids
C21H21O11	cyanidin-3-O-glucoside #2	Cy-3O-glc #2	M168	C08604	449.108	6.29	pos	Flavonoids
C21H21O11	cyanidin-3-O-glucoside #3	Cy-3O-glc #3	M169	C08604	449.109	6.36	pos	Flavonoids
C27H31O17	delphinidin 3,5-diglucoside	Dp-3,5-diglc	M145	C16312	627.152	4.91	pos	Flavonoids
C21H21O12	delphinidin 3-O-glucoside #1	Dp-3O-glc #1	M170	C12138	465.103	5.63	pos	Flavonoids
C21H21O12	delphinidin 3-O-glucoside #2	Dp-3O-glc #2	M138	C12138	465.104	6.03	pos	Flavonoids
C27H31O16	delphinidin-3-O-(6''-O-alpha-rhamnopyranosyl-beta-glucopyranoside)	Dp-3O-6''O-rha-glu	M189	/	611.158	5.8	pos	Flavonoids
C15H12O7	dihydroquercetin	Dihydro que	M135	C12316	304.058	6.59	neg	Flavonoids
C21H22O12	dihydroquercetin-O-hexoside #1	Dihydro que-O-hex #1	M174	/	466.111	5.06	neg	Flavonoids
C21H22O12	dihydroquercetin-O-hexoside #2	Dihydro que-O-hex #2	M175	/	466.111	5.19	neg	Flavonoids
C15H14O6	Epicatechin	Epicatechin	M151	C09727	290.079	5.61	neg	Flavonoids
C22H18O10	epicatechin gallate	ECG	M140	/	442.09	6.2	neg	Flavonoids
C15H14O7	epigallocatechin	EGC	M153	C12136	306.074	4.74	neg	Flavonoids
C15H12O6	eriodictyol	Eri	M149	C05631	288.062	7.16	neg	Flavonoids
C21H20O11	isoorientin	Isoo	M136	C01821	448.101	5.45	pos	Flavonoids
C23H24O11	isoorientin 7,3'-dimethyl ether	Isoo-7,3'-dimeth	M181	/	476.135	5.98	neg	Flavonoids
C33H40O21	isoorientin-7,2''-di-O-glucoside	Isoo-7,2''-di-O-glc	M203	/	772.207	5.47	pos	Flavonoids
C16H12O7	isorhamnetin	Isorhamnetin	M155	C10084	316.058	8.58	neg	Flavonoids
C22H22O11	isorhamnetin-O-rhamnoside	Isor-O-rha	M179	/	462.116	6.7	neg	Flavonoids
C32H30O14	isoscoparin	Isoscoparin	M199	C05990	638.163	6.16	neg	Flavonoids
C38H40O19	isoscoparin 2''-O-(6'''-(E)-feruloyl)-glucopyranoside	Isos-2''O-6'''-fer-glu	M206	/	800.214	5.6	neg	Flavonoids
C21H20O10	isovitexin	Isovitexin	M157	C01714	432.11	5.62	pos	Flavonoids
C21H20O11	kaempferol-3-O-glucoside	Kae-3O-glc	M162	C12249	448.1	6.27	neg	Flavonoids
C21H20O10	kaempferol-3-O-rhamnoside	Kae-3O-rha	M158	C16911	432.105	6.23	neg	Flavonoids
C27H30O14	kaempferol-3-O-rhamnoside-7-O-rhamnoside	Kae-3O-rha-7O-rha	M144	C16981	578.162	5.97	pos	Flavonoids
C21H20O10	kaempferol-7-O-rhamnoside	Kae-7O-rha	M160	/	432.105	6.58	neg	Flavonoids
C15H14O6	Luteoforol	Luteoforol	M152	C05907	290.08	5.62	pos	Flavonoids
C21H20O11	luteolin 7-O-glucoside	Lut-7O-glc	M161	C03951	448.101	6	neg	Flavonoids
C25H26O14	luteolin-di-pentoside	lut-di-pen	M185	/	550.13	6.2	neg	Flavonoids
C32H31O14	malvidin 3-O-(6-O-coumaryl)-glucoside	Mv-3O-6O-co-glc	M200	/	639.172	6.18	pos	Flavonoids
C15H10O7	morin	Morin	M146	C10105	302.042	6.35	pos	Flavonoids
C21H18O14	myricetin-3-O-glucuronide #1	My-3O-glc #1	M156	/	494.07	5.68	neg	Flavonoids
C21H20O13	myricetin-3-O-hexoside #1	My-3O-hex #1	M165	/	480.09	5.69	neg	Flavonoids
C21H20O13	myricetin-3-O-hexoside #2	My-3O-hex #2	M166	/	480.091	6.53	neg	Flavonoids
C15H12O5	naringenin	Nar	M148	C00509	272.068	8.57	neg	Flavonoids
C15H12O5	naringenin chalcone	Nar Cha	M134	C06561	272.069	8.23	neg	Flavonoids
C21H20O10	naringenin chalcone hexoside	Nar Cha hex	M159	C16407	432.105	6.35	neg	Flavonoids
C26H30O14	naringenin chalcone-C-pentoside-O-hexoside	Nar cha-C-pen-O-hex	M186	/	566.166	5.67	neg	Flavonoids
C31H29O13	peonidin 3-O-(6-O-coumaryl)-glucoside	Pn-3O-6O-glc	M198	/	609.162	6.19	pos	Flavonoids
C22H23O12	petunidin 3-glucoside	Pt-3-glc	M180	C12139	479.119	6.32	pos	Flavonoids
C30H26O12	procyanidin dimer B1	Procy B1	M191	/	578.143	4.98	neg	Flavonoids
C30H26O12	procyanidin dimer B2	Procy B2	M192	C17639	578.142	5.21	neg	Flavonoids
C30H26O12	procyanidin dimer B3	procy B2	M193	/	578.143	5.38	neg	Flavonoids
C30H26O12	procyanidin dimer B4	Procy B4	M194	C10238	578.142	5.71	neg	Flavonoids
C30H26O12	procyanidin dimer B5	Procy B5	M195	C17640	578.142	5.97	neg	Flavonoids
C37H30O16	procyanidin-O-gallate #1	Procy-O-gal #1	M204	/	730.155	5.5	neg	Flavonoids
C37H30O16	procyanidin-O-gallate #2	Procy-O-gal #2	M205	/	730.154	5.71	neg	Flavonoids
C15H10O7	quercetin	Que	M147	C00389	302.042	7.7	neg	Flavonoids
C21H20O12	quercetin 3-D-galactoside	Que-3-gal	M164	C10073	464.095	6.01	neg	Flavonoids
C21H20O11	quercetin-3-O-rhamnoside #1	Que-3O-rha #1	M163	C01750	448.1	6.34	neg	Flavonoids
C21H20O11	quercetin-3-O-rhamnoside #2	Que-3O-rha #2	M137	C01750	448.099	6.49	neg	Flavonoids
C27H30O16	quercetin-3-O-rutinoside #2	Que-3O-rut #2	M188	C05625	610.166	6.68	pos	Flavonoids
C16H12O7	rhamnetin	Rhamnetin	M154	C10176	316.063	5.79	pos	Flavonoids
C27H30O16	rutin	Rutin	M187	C05625	610.15	5.77	neg	Flavonoids
C22H22O10	swertisin #1	Swertisin #1	M141	C17835	446.124	6.16	neg	Flavonoids
C22H22O10	swertisin #2	Swertisin #2	M176	C17835	446.125	6.03	neg	Flavonoids
C23H24O13	syringetin 3-O-β-D-glucopyranoside	Syr-3O-glu	M183	/	508.121	6.26	neg	Flavonoids
C32H34O15	tricin 4'-O-(syringyl alcohol)ether O-hexoside	Tri-4'O-syr-O-hex	M84	/	658.18	6.46	pos	Flavonoids
C29H34O16	tricin 7-O-neohesperidoside	Tri-7O-neo	M201	/	638.171	6.18	pos	Flavonoids
C23H24O12	tricin 7-O-β-D-glucopyranoside	Tri-7O-glu	M190	/	492.126	6.38	neg	Flavonoids
C33H36O16	tricin O-glucoside O-guaiacylglyceryl ether	Tri-O-glc-O-gua	M143	/	688.199	6.16	pos	Flavonoids
C20H20O14	digalloylglucose #1	DiGal glu #1	M212	/	484.085	4.73	neg	Hydrolysable Tannins
C20H20O14	digalloylglucose #2	DiGal glu #2	M213	/	484.085	4.91	neg	Hydrolysable Tannins
C27H22O18	galloyl-HHDP-glucose #1	Gal-HHDP-glu #1	M214	/	634.08	4.96	neg	Hydrolysable Tannins
C27H22O18	galloyl-HHDP-glucose #2	Gal-HHDP-glu #2	M215	/	634.081	5.07	neg	Hydrolysable Tannins
C34H26O22	HHDP-digalloylglucose #1	HHDP-gal glu#1	M208	/	786.092	5.41	neg	Hydrolysable Tannins
C34H26O22	HHDP-digalloylglucose #2	HHDP-gal glu#2	M216	/	786.091	5.52	neg	Hydrolysable Tannins
C13H16O10	monogalloyl glucose #1	Mono glu #1	M209	/	332.074	3.96	neg	Hydrolysable Tannins
C13H16O10	monogalloyl glucose #2	Mono glu #2	M210	/	332.074	4.05	neg	Hydrolysable Tannins
C13H16O10	monogalloyl glucose #3	Mono glu #3	M207	/	332.074	4.24	neg	Hydrolysable Tannins
C13H16O10	monogalloyl glucose #4	Mono glu #4	M211	/	332.074	4.45	neg	Hydrolysable Tannins
C5H8O5	ribonolactone	Rib-lac	M217	/	148.037	3.12	neg	Lactones
C12H18O3	jasmonic acid	JA	M218	C08491	210.124	3.77	pos	Lineolic acids and derivatives
C17H32O2	10-heptadecenoate (17:1n7)	10-Heptadecenoate (17:1n7)	M228	/	268.24	15.74	pos	Lipids
C18H30O3	13(S)-HOTrE	13(S)-HOTrE	M231	C16316	294.218	15.36	neg	Lipids
C21H44NO7P	1-LysoPE(16:0)	1-LysoPE(16:0)	M220	/	453.286	14.09	neg	Lipids
C23H46NO7P	1-LysoPE(18:1)	1-LysoPE(18:1)	M242	/	479.301	14.71	neg	Lipids
C23H44NO7P	1-LysoPE(18:2)	1-LysoPE(18:2)	M240	/	477.285	13.22	neg	Lipids
C23H42NO7P	1-LysoPE(18:3)	1-LysoPE(18:3)	M221	/	475.27	12.02	neg	Lipids
C14H28O3	2-hydroxymyristic acid	2-Hydroxymyristic Acid	M224	/	244.203	16	neg	Lipids
C23H46NO7P	2-LysoPE(18:1)	2-Lysope(18:1)	M241	/	479.301	14.35	neg	Lipids
C23H44NO7P	2-LysoPE(18:2)	2-Lysope(18:2)	M239	/	477.285	12.86	neg	Lipids
C23H42NO7P	2-LysoPE(18:3)	2-Lysope(18:3)	M238	/	475.27	11.7	neg	Lipids
C19H38O4	2-palmitoylglycerol	2-Palmitoylglycerol	M235	/	330.274	13.42	pos	Lipids
C6H10O5	3-hydroxy-3-methyl-Glutaric acid	3-Oh-3-Met-Glu	M246	C03761	162.053	4.04	neg	Lipids
C18H32O3	9-HODE	9-HODE	M232	C14767	296.235	14.91	neg	Lipids
C18H30O3	9-HOTrE	9-HOTrE	M219	C16326	294.219	13.85	neg	Lipids
C18H28O3	9-OxoOTrE	9-OxoOTrE	M229	/	292.204	14.31	neg	Lipids
C4H6O3	acetoacetate	Acetoacetate	M223	C00164	102.032	1.92	neg	Lipids
C20H40O2	arachidate (20:0)	Arachidate (20:0)	M236	C06425	312.302	17.79	neg	Lipids
C5H14NO	choline	Choline	M244	C00114	104.109	1.68	pos	Lipids
C2H7NO	ethanolamine	Eriodictyol	M243	C00189	61.053	1.52	pos	Lipids
C3H8O3	glycerol	Glycerate	M222	C00116	92.05	1.66	pos	Lipids
C21H39NO4	N-oleoyl-serine	N-ol-Ser	M237	/	369.289	16.5	pos	Lipids
C16H32O2	palmitate (16:0)	Palmitate (16:0)	M227	C00249	256.24	18.78	neg	Lipids
C5H15NO4P	phosphocholine	PC	M245	C00588	184.073	1.72	pos	Lipids
C16H22O4	phthalic acid mono-2-ethylhexyl Ester	PA mono-2-eth Ester	M226	C03343	278.152	15.86	pos	Lipids
C18H39NO3	phytosphingosine	Phytosphingosine	M234	C12144	317.293	10.74	pos	Lipids
C18H30O2	pinolenic acid	Pinolenic Ccid	M230	/	278.224	17.35	neg	Lipids
C8H20NO6P	sn-Glycero-3-phosphocholine	Sn-GPC	M247	C00670	257.107	1.67	pos	Lipids
C18H39NO2	sphinganine	Sphinganine	M233	C00836	301.298	11.78	pos	Lipids
C14H31N	tetradecylamine	Tetradecylamine	M225	/	213.246	9.93	pos	Lipids
C21H36O10	terpenyl-pentosyl-glucoside #1	Ter-pen-glc #1	M249	/	448.231	6.97	neg	Monoterpenol glycoconjugation
C21H36O10	terpenyl-pentosyl-glucoside #2	Ter-pen-glc #2	M250	/	448.231	7.08	neg	Monoterpenol glycoconjugation
C21H36O10	terpenyl-pentosyl-glucoside #3	Ter-pen-glc #3	M248	/	448.231	7.17	neg	Monoterpenol glycoconjugation
C9H13N3O4	2'-deoxycytidine	2'-Deoxycytidine	M258	/	227.091	1.56	pos	Nucleotides
C5H5N5	adenine	Adenine	M265	C00881	135.055	2.44	pos	Nucleotides
C10H13N5O4	adenosine	Adenosine	M251	C00147	267.097	3.9	pos	Nucleotides
C10H14N5O7P	adenosine 5'-monophosphate	5'-AMP	M253	C00212	347.063	2.49	neg	Nucleotides
C5H14N4	agmatine	Agmatine	M263	C00020	130.121	1.41	pos	Nucleotides
C9H13N3O5	cytidine	Cytidine	M268	C00020	243.085	2.44	pos	Nucleotides
C4H5N3O	cytosine	Cytosine	M255	C00475	111.043	1.68	pos	Nucleotides
CH5N3	guanidine	Guanidine	M269	C00380	59.048	1.55	pos	Nucleotides
C5H5N5O	guanine	Guanine	M266	C17349	151.05	3.98	pos	Nucleotides
C10H13N5O5	guanosine	Guanosine	M252	C00242	283.092	3.97	neg	Nucleotides
C10H14N5O8P	guanosine 5'- monophosphate (5'-GMP)	5'-GMP	M260	C00387	363.056	2.49	pos	Nucleotides
C10H15N5O11P2	guanosine 5'-diphosphate	5'-GDP	M261	C00144	443.024	1.72	pos	Nucleotides
C5H4N4O	hypoxanthine	Hypoxanthine	M256	C00035	136.038	3.07	pos	Nucleotides
C10H12N4O5	inosine	Inosine	M259	C00262	268.082	1.7	pos	Nucleotides
C14H17N5O8	succinyladenosine	Suc-Adenosine	M262	C00294	383.107	4.43	neg	Nucleotides
C4H4N2O2	uracil	Uracil	M254	/	112.027	2.49	pos	Nucleotides
C5H4N4O3	urate	Urate	M264	C00106	168.028	2.61	neg	Nucleotides
C9H12N2O6	uridine	Uridine	M267	C00366	244.071	3.62	neg	Nucleotides
C9H13N2O9P	uridine monophosphate (5' or 3')	5' Or 3'UMP	M257	C00299	324.036	1.88	neg	Nucleotides
C7H12O6	quinate	quinate	M1	C00296	192.064	1.89	pos	Organic acids
C5H6O5	3-oxoglutaric acid	3-oxoglu	M271	/	146.021	2.48	neg	Organic acids
C4H8O3	4-Hydroxybutyric Acid	GHB	M278	C00989	104.047	4.1	neg	Organic acids
C6H6O6	aconitic acid	Aconitic acid	M272	C00417	174.016	3.13	neg	Organic acids
C9H16O4	azelaic acid	Azelaic acid	M280	C08261	188.105	6.85	neg	Organic acids
C9H7NO	indole-3-carbaldehyde	Ind-3-car	M274	C08493	145.051	7.16	pos	Organic acids
C10H7NO3	kynurenate	Kynurenate	M270	C01717	189.043	5.01	pos	Organic acids
C4H4O4	maleic acid	Maleic Acid	M276	C01384	116.011	2.19	neg	Organic acids
C4H6O5	malic acid	Malic Acid	M277	C00497	134.022	2.19	neg	Organic acids
C8H8O3	phenoxyacetic acid	Phenoxyacetic Acid	M273	C02181	152.047	7.32	neg	Organic acids
C3H6O2	propionic acid	Propionic Acid	M275	C00163	74.037	3.89	neg	Organic acids
C7H6O3	salicylic acid	SA	M279	C00805	138.031	7.69	neg	Organic acids
C20H43NO4	2-Amino-1,3,4,5-eicosanetetrol	2-Amino-1,3,4,5-eicosanetetrol	M289	/	361.318	9.26	pos	Others
C14H31NO3	2-Amino-1,3,4-tetradecanetriol	2-Amino-1,3,4-tetradecanetriol	M283	/	261.231	6.64	pos	Others
C20H43NO2	2-Amino-1,3-eicosanediol	2-Amino-1,3-eicosanediol	M288	/	329.33	12.48	pos	Others
C18H39NO2	2-Amino-1,3-octadecanediol	2-Amino-1,3-octadecanediol	M287	/	301.299	10.8	pos	Others
C14H31NO	dodecyl (dimethyl) amine oxide	DAO	M286	/	229.241	9.22	pos	Others
C13H24N2O	N,N'-Dicyclohexylurea	N,N'-DCU	M282	/	224.189	10.51	pos	Others
C12H25O15P	phospho-diglucose	P-diglu	M285	/	440.088	1.8	neg	Others
C16H36N	tetrabutylammonium	Tet-lam	M284	/	242.28	8.64	pos	Others
C20H23N7O7	formyltetrahydrofolate	Cho-Thf	M290	C03479	473.168	4.69	neg	Pteridines and derivatives
C20H22O8	trans-resveratrol 3-O-glucoside	Trans-Res-3O-glc	M291	/	390.131	6.06	neg	Stilbenes

## Sheet: Table S2
Table S2 The ratio of each stage compared with S1.
Class	Metabolite Name	Ratio												p-value
		RR_skin_S1/S1	RR_skin_S2/S1	RR_skin_S3/S1	RR_skin_S4/S1	RR_skin_S5/S1		RC_skin_S1/S1	RC_skin_S2/S1	RC_skin_S3/S1	RC_skin_S4/S1	RC_skin_S5/S1		RR_skin_S1/S1	RR_skin_S2/S1	RR_skin_S3/S1	RR_skin_S4/S1	RR_skin_S5/S1		RC_skin_S1/S1	RC_skin_S2/S1	RC_skin_S3/S1	RC_skin_S4/S1	RC_skin_S5/S1
Amino acids, peptides, and analogues	tyramine	1	0.0635267	0.0579241	0.0326316	0.034202		1	0.462357	0.0588595	0.010157	0.0147963		1	0.000974165	0.00236087	0.00216445	0.00293893		1	0.0431377	0.0103747	0.00931499	0.0104445
Amino acid derivatives	trimethyllysine	1	0.232832	0.117987	0.10451	0.111421		1	0.846013	0.958245	0.30648	0.33801		1	0.24953	0.224027	0.199586	0.212361		1	0.66411	0.960252	0.192306	0.215099
Amino acids, peptides, and analogues	pyroglutamic acid	1	0.556159	0.529914	0.238232	0.243917		1	0.651314	0.652546	0.471415	0.413503		1	0.0329533	0.117419	0.0070596	0.00706165		1	0.00301342	0.0296047	0.0258451	0.0189005
Amino acids, peptides, and analogues	betaine	1	0.46919	0.309996	0.326799	0.489527		1	1.06744	0.594987	0.588089	0.435684		1	0.00152599	0.023652	0.000278263	0.00224159		1	0.221239	0.0248417	0.00403535	0.00427198
Amino acids, peptides, and analogues	homoserine	1	1.00633	1.24051	1.29585	1.44402		1	0.593362	0.481164	0.567935	0.663609		1	0.958949	0.128693	0.276196	0.193568		1	0.0716262	0.00252703	0.0509379	0.00718353
Amino acid derivatives	caftaric acid-glutathione	1	1.29714	0.822686	0.531155	0.601679		1	2.69532	2.89058	1.83788	0.729823		1	0.151073	0.248923	0.135693	0.167955		1	0.000468511	0.0611278	0.263728	0.573146
Amino acids, peptides, and analogues	glutamine	1	0.570772	0.389622	0.133939	0.147737		1	1.15969	0.894047	0.880893	0.74573		1	0.00384274	0.00753873	0.00151734	0.00163739		1	0.0880767	0.184114	0.126757	0.0214462
Amino acids, peptides, and analogues	gamma-aminobutyrate (GABA)	1	1.63356	1.34195	1.97544	2.27719		1	0.486172	0.76944	0.885995	0.796774		1	0.000152663	0.49878	0.00760209	0.0489593		1	0.00756393	0.117133	0.130278	0.118103
Amino acids, peptides, and analogues	methylbenzoate	1	1.23483	0.968722	1.28434	0.998807		1	0.731404	0.68663	0.703322	0.877902		1	0.0148972	0.475714	0.015881	0.992706		1	0.083358	0.0108081	0.0232015	0.122691
Amino acids, peptides, and analogues	spermidine	1	0.61326	0.821991	0.69596	0.796532		1	0.399079	0.594176	0.914713	0.887923		1	0.350994	0.486706	0.439551	0.457209		1	0.157325	0.296841	0.7297	0.691699
Amino acids, peptides, and analogues	aspartate	1	0.880005	0.736033	0.8612	0.930217		1	0.830842	1.05429	1.07903	1.00319		1	0.117406	0.420075	0.0469434	0.167169		1	0.0199067	0.041345	0.149248	0.945014
Amino acids, peptides, and analogues	4-acetamidobutanoate	1	0.90107	1.05482	1.10172	1.29265		1	1.5892	1.14127	1.27289	1.1293		1	0.354634	0.392242	0.493417	0.253995		1	0.0257244	0.0404298	0.390262	0.634618
Amino acids, peptides, and analogues	2-aminoadipic acid	1	1.20362	0.952571	0.878687	0.847252		1	0.773868	0.939984	0.862409	1.21035		1	0.0152968	0.32288	0.334905	0.253342		1	0.00153201	0.658777	0.00146959	0.113505
Amino acids, peptides, and analogues	N-acetylasparagine	1	3.73671	8.13814	13.2899	16.146		1	0.625778	3.50518	7.32041	11.2268		1	0.0252053	0.155541	0.147043	0.111318		1	0.229125	0.0442261	0.100158	0.183658
Amino acids, peptides, and analogues	serine	1	0.625974	0.543916	0.618022	0.981516		1	1.74346	1.67278	1.46877	1.81815		1	0.0333391	0.0257727	0.0434984	0.605193		1	0.0223174	0.00526695	0.0219816	0.00564489
Amino acids, peptides, and analogues	N-acetylisoleucine	1	0.913469	0.855658	0.939178	0.758274		1	1.41254	1.64431	2.04337	2.11967		1	0.19108	0.0705862	0.71216	0.051311		1	0.0847143	0.0153182	0.0213285	0.00956579
Amino acids, peptides, and analogues	2,6-diaminopimelic acid	1	2.01875	4.6611	6.39507	7.17616		1	0.974096	1.82364	2.11883	2.18011		1	0.000558969	0.203126	4.65869e-05	0.00778091		1	0.749735	0.00396206	0.0103762	0.029062
Amino acids, peptides, and analogues	glutamic acid	1	1.45945	1.38807	1.44823	1.44311		1	1.42408	1.85558	1.92645	2.26976		1	0.00899251	0.0213905	0.00509216	0.01696		1	0.0278057	0.0125897	0.0169114	0.00922987
Amino acids, peptides, and analogues	glycine	1	1.38682	1.66518	2.68586	3.86203		1	1.81724	2.38095	2.13086	2.63413		1	0.0537377	0.4489	0.00204232	0.00933141		1	0.0100827	0.000514434	0.0121837	0.0134362
Amino acids, peptides, and analogues	phenylalanine	1	1.38703	1.55855	2.55346	2.84697		1	1.19013	1.40516	1.75567	2.73965		1	0.00414981	0.00695302	0.00419636	0.00364811		1	0.0414698	0.00133334	0.00435004	0.00045234
Amino acids, peptides, and analogues	tyrosine	1	1.18375	1.19142	1.28433	1.4862		1	1.61533	2.64289	2.34087	3.02826		1	0.00129252	0.0419055	0.00546013	0.052231		1	0.0131255	0.0210254	0.00829956	0.0127807
Amino acids, peptides, and analogues	N6-acetyllysine	1	2.08292	2.69102	8.31614	12.5507		1	0.559905	0.738705	1.20586	3.18968		1	0.00726104	0.00101229	0.00989338	0.023354		1	0.0559206	0.170299	0.369752	0.033069
Amino acids, peptides, and analogues	N-acetylleucine	1	0.91257	1.06874	1.27771	1.38959		1	1.41035	1.88648	2.73241	3.83305		1	0.323977	0.197432	0.0499434	0.00247917		1	0.0507255	0.0669529	0.0358705	0.00393989
Amino acids, peptides, and analogues	asparagine	1	0.5527	1.43778	2.15766	2.36647		1	0.894717	1.315	2.23998	3.99155		1	0.0254068	0.036762	0.00901851	0.00132662		1	0.327921	0.0148414	0.00702797	0.00058241
Amino acids, peptides, and analogues	N-acetylglutamate	1	1.55733	0.937111	0.832922	0.82521		1	3.31772	5.13586	3.58225	4.14959		1	0.010376	0.411285	0.00236277	0.203397		1	0.00871913	0.0289322	0.0125589	0.0233352
Amino acids, peptides, and analogues	N-acetylmethionine	1	1.01713	1.567	1.40574	1.71867		1	1.78503	3.30642	4.23675	4.88168		1	0.953574	0.0193246	0.171325	0.0428842		1	0.134425	0.00472803	0.0204014	0.00340309
Amino acids, peptides, and analogues	isoleucine	1	1.83699	2.13349	4.66743	5.1674		1	1.30654	1.64904	3.16178	5.75764		1	0.00828598	0.00254329	0.00139725	0.00250815		1	0.066682	0.0218193	0.00175573	0.000218919
Amino acids, peptides, and analogues	ornithine	1	1.28307	1.33585	1.37079	1.47659		1	4.35349	5.48078	5.78232	6.13146		1	0.0121868	0.0515083	0.00126651	0.0488265		1	0.00320615	0.000281347	0.00611332	0.00232042
Amino acids, peptides, and analogues	alanine	1	4.84167	1.81828	1.15549	0.990217		1	5.54435	7.63343	6.30215	6.14813		1	0.00254378	0.0372547	0.310994	0.966845		1	0.0434402	0.00480754	0.0138714	0.0020579
Amino acids, peptides, and analogues	cysteine	1	2.6881	5.57927	5.40066	7.06836		1	1.97983	7.27154	6.52629	6.58382		1	0.0675001	0.00340139	0.0113827	0.00817584		1	0.256559	0.00692204	0.0396052	0.00290423
Amino acids, peptides, and analogues	arginine	1	1.27921	1.37654	1.47925	1.52895		1	4.81459	5.86465	6.2304	6.73129		1	0.0145851	0.0410456	0.00105843	0.0377244		1	0.00382991	8.85656e-05	0.00248832	0.00072092
Amino acids, peptides, and analogues	symmetric dimethylarginine	1	1.93035	2.40494	2.42352	2.25951		1	2.14492	3.44341	5.78862	6.91999		1	0.0142413	0.0106201	0.0127078	0.0709151		1	0.00437685	0.00699504	0.00296895	0.00178783
Amino acids, peptides, and analogues	pipecolic acid	1	1.29758	2.43911	1.82873	2.30757		1	1.42982	4.17254	4.68881	7.90499		1	0.07012	0.025985	0.057596	0.0840747		1	0.0109064	0.0137974	0.00131644	0.0164072
Amino acids, peptides, and analogues	lysine	1	2.11238	2.1774	3.40988	4.05604		1	3.0185	6.20822	6.78657	8.39063		1	0.000404375	0.0374443	0.000121971	0.00901225		1	0.000787899	0.00705639	0.000828998	0.00250507
Amino acids, peptides, and analogues	glutathione (reduced)	1	4.18907	1.69575	1.18057	2.97835		1	0.345715	0.505688	2.31778	8.41016		1	0.0725852	0.0815345	0.483026	0.122285		1	0.0942564	0.22787	0.477041	0.0386842
Amino acids, peptides, and analogues	proline	1	4.58754	10.5024	11.4974	12.5453		1	1.24723	6.13786	4.91948	8.95174		1	0.00107874	0.00243279	0.00647501	0.03596		1	0.162924	0.00197769	0.00135812	0.00217619
Amino acids, peptides, and analogues	S-Methylmethionine	1	4.26516	5.64247	7.55508	9.66393		1	1.48647	8.40057	8.21705	12.1798		1	0.00117262	0.00620994	0.000383932	0.0111063		1	0.0393756	0.00978165	0.00749329	0.0116017
Amino acids, peptides, and analogues	methionine	1	4.04961	5.07211	8.26428	9.58054		1	0.723682	5.00796	6.61895	12.8869		1	0.00144918	0.00308465	0.00570668	0.018691		1	0.000358108	0.0188409	0.00801838	0.0151883
Amino acids, peptides, and analogues	argininosuccinate	1	2.60442	3.67444	6.04954	6.72333		1	7.51026	7.47444	10.7423	13.0741		1	0.011274	0.0042966	0.00349584	0.00844892		1	0.173566	0.00246652	0.00132503	0.00298034
Amino acids, peptides, and analogues	trans-urocanate	1	2.56588	5.59047	5.51509	7.56454		1	2.08679	6.86506	10.6443	13.8838		1	0.0678836	0.0136829	0.00834047	0.0255874		1	0.0568289	0.0180929	0.0140961	0.00743913
Amino acids, peptides, and analogues	gamma-guanidinobutyric acid	1	2.11569	2.87394	3.48162	3.09104		1	3.92	13.041	14.8421	14.435		1	0.0977844	0.0151594	0.0482599	0.0346875		1	0.00517404	0.0127947	0.00759917	0.00549276
Amino acids, peptides, and analogues	N-acetylproline	1	1.92595	10.3749	14.5227	24.5402		1	1.05818	7.93564	10.5374	15.186		1	0.306669	0.00230489	0.000152597	0.00365293		1	0.384956	0.0160841	0.114087	0.00242158
Amino acids, peptides, and analogues	valine	1	2.51339	2.82879	4.92836	5.40011		1	1.73548	6.43494	9.56943	16.7888		1	0.000290556	0.0382334	0.000123404	0.00921579		1	0.207913	0.0105886	0.000220055	0.00185987
Amino acids, peptides, and analogues	glutamyl-leucine	1	2.79756	4.05	6.11667	7.62366		1	1.80003	6.64862	9.27436	17.9943		1	0.00117719	0.0077517	0.00248789	0.0136672		1	0.0160463	0.00770403	0.00279412	0.00695288
Amino acids, peptides, and analogues	norvaline	1	2.72461	3.29344	5.35064	6.04058		1	2.14512	6.59178	9.42661	18.0884		1	0.000548743	0.0247977	0.00495057	0.014944		1	0.0146246	0.0190944	0.00796698	0.0105678
Amino acids, peptides, and analogues	S-methylcysteine	1	2.65101	2.7636	4.22108	4.2055		1	2.79183	7.46854	7.88292	19.3518		1	0.0166743	0.0695649	0.0175318	0.0530756		1	0.0148934	0.0026842	0.0131521	0.0063329
Amino acids, peptides, and analogues	leucine	1	2.55187	3.81028	8.00469	9.4094		1	1.68191	4.3624	8.75429	20.1785		1	0.00155884	0.000879742	0.00146663	0.00266494		1	0.00319135	0.000794422	0.000224897	0.000154845
Amino acids, peptides, and analogues	citrulline	1	0.701742	0.386497	0.614466	0.952777		1	11.7416	12.9319	9.78898	23.0202		1	0.00242569	0.070703	0.0686683	0.857331		1	0.00146208	0.00313035	0.0021127	0.00363653
Amino acids, peptides, and analogues	histidine	1	3.58446	7.19618	7.90679	10.1083		1	3.64793	11.1154	16.6755	26.5245		1	0.000545322	0.0025256	0.00144658	0.00543397		1	0.00705675	0.00035715	0.00146007	0.000866362
Amino acids, peptides, and analogues	glutathione (oxidized)	1	2.4093	2.03042	1.01621	1.15606		1	3.05543	6.34165	13.8421	38.0598		1	0.0190612	0.0561778	0.958666	0.362129		1	0.0321111	0.0158663	0.089981	0.0182612
Amino acids, peptides, and analogues	tryptophan	1	3.13375	6.98497	5.20784	7.45645		1	6.80862	26.6356	38.2159	42.1792		1	0.00840033	0.00825955	0.00135436	0.00193484		1	0.00319132	4.40028e-05	0.00144886	0.000841262
Benzene and substituted derivatives	vanillate	1	0.466105	0.376062	0.274394	0.213352		1	0.380073	0.162439	0.12665	0.0804169		1	0.0565953	0.0401854	0.0421597	0.0352414		1	0.0685506	0.0537075	0.0402758	0.0477347
Benzene and substituted derivatives	hydroxybenzoic acid-O-hexoside	1	0.85378	0.511799	0.801697	1.7019		1	0.394328	0.266992	0.293368	0.349126		1	0.126546	0.00721799	0.0556359	0.472609		1	0.00114895	0.00136709	0.000273895	0.00159509
Benzene and substituted derivatives	gallic acid	1	1.07806	1.07656	1.07653	0.830925		1	1.20375	1.1884	0.677443	0.442184		1	0.662057	0.600843	0.728165	0.488091		1	0.0184534	0.355371	0.0182019	0.00243097
Benzene and substituted derivatives	protocatechuic acid	1	0.870297	1.44649	1.01467	1.27968		1	1.024	1.20322	1.35356	1.5587		1	0.55118	0.21006	0.779081	0.158372		1	0.926891	0.543296	0.0275427	0.0537068
Benzene and substituted derivatives	benzoic acid	1	1.20313	1.12235	1.17919	1.04107		1	1.2465	1.65116	1.85717	1.86772		1	0.0139095	0.122286	0.0740413	0.474541		1	0.0589792	0.016161	0.000747229	0.00311753
Benzene and substituted derivatives	protocatechuic Acid O-hexoside #2	1	0.816118	0.648571	0.697458	0.550114		1	1.07584	1.22985	1.39468	2.40102		1	0.0290418	0.0115409	0.00789639	0.00588278		1	0.134535	0.014719	0.0126633	0.00011077
Benzene and substituted derivatives	protocatechuic Acid O-hexoside #1	1	2.28992	4.45557	8.42383	8.58187		1	0.800058	1.46981	2.6192	4.68824		1	0.00124805	0.000186285	0.000913626	0.00259305		1	0.0626448	0.0189744	0.00447183	7.64429e-05
Benzene and substituted derivatives	2-hydroxybenzaldehyde	1	0.557427	0.74509	0.47219	0.513992		1	0.107735	0.100482	0.0994362	0.122019		1	0.198119	0.364609	0.190487	0.15609		1	0.0549548	0.054385	0.0529994	0.0596136
Benzene and substituted derivatives	3-cresotinic acid	1	1.25822	1.09935	0.865515	1.1666		1	0.848434	0.964355	1.04671	1.05077		1	0.480889	0.687858	0.610873	0.354854		1	0.200762	0.776101	0.485211	0.0650586
Benzene and substituted derivatives	4-Nitrophenol	1	0.784482	0.698209	0.655285	0.594929		1	0.82301	0.68177	0.57306	0.562874		1	0.0469963	0.0319487	0.0169682	0.0108848		1	0.344529	0.162408	0.131713	0.0825419
Benzene and substituted derivatives	syringic acid	1	2.41559	2.00181	1.92342	2.79426		1	0.576662	1.31875	1.98066	2.99442		1	0.38814	0.155631	0.327355	0.392145		1	0.417519	0.522663	0.51071	0.384509
Carbohydrates and carbohydrate conjugates	glycerate	1	0.667576	0.513127	0.420756	0.389671		1	0.786749	0.608391	0.430906	0.344463		1	0.00762467	0.0107909	0.000658399	0.00230219		1	0.112416	0.0170526	0.015728	0.00826371
Carbohydrates and carbohydrate conjugates	1-O-Sinapoyl-β-D-glucose #1	1	0.727845	0.658645	0.524223	0.534933		1	0.735414	0.650834	0.65252	0.524775		1	0.0149941	0.0373173	0.0112872	0.00512984		1	0.0128439	0.0103267	0.00261551	0.00133736
Carbohydrates and carbohydrate conjugates	1-O-Sinapoyl-β-D-glucose #3	1	0.680936	0.665098	0.582522	0.634636		1	0.781784	0.516019	0.503146	0.529869		1	0.00467919	0.00701859	0.0110992	0.000501263		1	0.0640106	0.00950919	0.00306144	0.00702009
Carbohydrates and carbohydrate conjugates	1-O-Sinapoyl-β-D-glucose #2	1	0.763234	0.856787	0.831715	1.07614		1	0.764953	0.608746	0.6165	0.663403		1	0.184174	0.0493287	0.254036	0.481192		1	0.0401216	0.0229719	0.00795493	0.0338735
Carbohydrates and carbohydrate conjugates	fructose	1	0.992351	0.651639	0.697431	0.641237		1	1.51957	1.29132	1.02831	0.699107		1	0.838109	0.380389	0.00634328	0.00673433		1	0.00964356	0.0167208	0.0692386	0.00101403
Carbohydrates and carbohydrate conjugates	raffinose	1	0.710587	0.909905	0.91053	1.0057		1	0.83857	0.759277	0.7915	0.902457		1	0.000659508	0.15057	0.133329	0.910779		1	0.106562	0.0317895	0.0273196	0.0434717
Carbohydrates and carbohydrate conjugates	rhamnose	1	0.906153	1.21181	1.29993	1.48476		1	1.06124	1.08209	1.1037	1.26265		1	0.386625	0.0439149	0.125493	0.0162021		1	0.562997	0.621169	0.342703	0.00547063
Carbohydrates and carbohydrate conjugates	alpha-ketoglutarate	1	0.612124	0.549858	0.337242	0.328176		1	2.46511	1.49073	1.51821	1.33591		1	0.00457314	0.0111698	0.00100148	0.001827		1	0.0287384	0.0291287	0.0096905	0.0114817
Carbohydrates and carbohydrate conjugates	methyl-alpha-glucopyranoside	1	1.12747	1.10982	1.19984	1.15218		1	1.36037	1.62016	1.47773	1.46215		1	0.0364484	0.0446325	0.0361509	0.243644		1	0.0633596	0.00806307	0.0165577	0.0140187
Carbohydrates and carbohydrate conjugates	gluconic acid	1	0.468909	0.385684	0.361192	0.355159		1	2.64562	1.65257	1.61954	1.48496		1	0.0109662	0.00531633	0.00566938	0.0100988		1	0.00735645	0.00492028	0.0591188	0.0319375
Carbohydrates and carbohydrate conjugates	arabinose	1	0.958078	0.853094	0.797157	0.675575		1	1.78461	1.72128	1.63097	1.49648		1	0.155991	0.0109265	0.0313777	0.0228116		1	0.0181637	0.00339347	0.0147453	0.0195085
Carbohydrates and carbohydrate conjugates	isocitrate	1	1.17039	1.0337	1.0383	0.973769		1	1.27985	1.50103	1.40737	1.52505		1	0.11475	0.592025	0.691982	0.774191		1	0.00750501	0.0155389	0.0372215	0.0154482
Carbohydrates and carbohydrate conjugates	glucosaminic acid	1	0.76752	1.01886	1.09958	1.10687		1	1.615	1.44137	1.55261	1.75065		1	0.0196982	0.88068	0.391248	0.100573		1	0.00282052	0.0317575	0.00390175	0.0221724
Carbohydrates and carbohydrate conjugates	glucose	1	1.20686	1.3032	1.356	1.43311		1	1.7733	1.9662	1.93875	2.05127		1	0.00920422	0.00355488	0.0155346	0.0394017		1	0.0157828	0.00291142	0.0125953	0.0068886
Carbohydrates and carbohydrate conjugates	sucrose	1	0.955187	1.05024	1.05209	1.10294		1	1.83179	1.85435	1.97585	2.1559		1	0.108988	0.525548	0.251023	0.149123		1	0.0183752	0.0082479	0.00451947	0.00103466
Carbohydrates and carbohydrate conjugates	1-kestose	1	0.752608	0.928334	0.62954	0.661876		1	4.15548	4.22271	3.10937	3.37694		1	0.0496085	0.14185	0.0300456	0.00183247		1	0.000931375	0.00288499	0.00428646	0.00526093
Carbohydrates and carbohydrate conjugates	citramalic acid	1	1.27114	1.04803	0.688082	0.583639		1	3.30737	5.13633	5.35856	4.79492		1	0.0190123	0.0926175	0.0148754	0.00155886		1	0.00171683	0.000721703	7.48088e-05	0.000380012
Carbohydrates and carbohydrate conjugates	glyceraldehyde	1	0.984983	1.15474	2.18493	2.32		1	5.91311	6.68467	8.15396	5.5278		1	0.951195	0.811288	0.0136065	0.00029989		1	0.0513211	0.0493224	0.0119416	0.0107744
Carbohydrates and carbohydrate conjugates	stachyose	1	1.34412	0.966518	1.60016	1.72649		1	7.65456	7.1519	7.17038	7.06668		1	0.0755855	0.950672	0.104783	0.089334		1	0.0186544	0.0205314	0.0281423	0.00685218
Carbohydrates and carbohydrate conjugates	5'-deoxy-5'-(methylthio)adenosine	1	3.76636	2.66223	3.13697	3.02221		1	3.02181	9.23834	8.33069	8.56181		1	0.00931918	0.0264583	0.0095511	0.0629681		1	0.018969	0.0110162	0.00500403	0.0112943
Carbohydrates and carbohydrate conjugates	maltotriose	1	0.196211	0.722678	0.474111	1.14783		1	17.4639	11.9803	4.01047	14.9452		1	0.0319556	0.0805025	0.184777	0.0608947		1	0.00157749	0.0198603	0.42265	0.000580176
Carbohydrates and carbohydrate conjugates	trehalose	1	1.5105	1.09201	1.93994	2.07287		1	9.54843	13.8128	16.8047	17.4832		1	0.106767	0.853853	0.0960159	0.138582		1	0.0079307	0.00139375	0.00366926	0.00106261
Carbohydrates and carbohydrate conjugates	maltohexaose	1	1.42679	1.06783	1.81645	1.85023		1	31.4347	40.3765	49.316	55.624		1	0.166896	0.901194	0.0563688	0.102779		1	0.00256596	0.00348438	0.00399792	0.00425158
Carbohydrates and carbohydrate conjugates	fructose 6-phosphate	1	1.07669	0.817249	1.02936	0.931575		1	1.32033	1.86533	1.84609	1.8832		1	0.655286	0.63557	0.877104	0.626491		1	0.174243	0.106843	0.0833251	0.092001
Carbohydrates and carbohydrate conjugates	citraconate	1	0.835636	0.871171	0.877367	0.900417		1	1.04662	0.92612	0.87356	1.08318		1	0.0374829	0.0597795	0.26994	0.268409		1	0.617993	0.308248	0.0581838	0.103693
Carbohydrates and carbohydrate conjugates	maltotetraose	1	0.672054	0.528783	0.72186	0.873803		1	5.63904	4.31194	4.11681	3.75333		1	0.0463909	0.203432	0.278934	0.423452		1	0.025908	0.058222	0.00578558	0.112101
Carbohydrates and carbohydrate conjugates	glycolate (hydroxyacetate)	1	1.00373	0.878886	0.916578	0.938064		1	0.789649	0.700676	0.667837	0.707118		1	0.900164	0.0284608	0.140433	0.628431		1	0.164621	0.0725399	0.077084	0.117645
Carbohydrates and carbohydrate conjugates	dimethyl malonate	1	1.31626	1.44283	1.48668	1.28829		1	0.944393	1.22169	1.24041	1.227		1	0.482784	0.107214	0.09272	0.107407		1	0.743193	0.278898	0.197302	0.15794
Carbohydrates and carbohydrate conjugates	1-O-Feruloyl-β-D-glucose	1	0.928021	1.14685	1.36942	1.71634		1	0.829405	0.729934	0.728975	1.04674		1	0.375844	0.0433191	0.0218401	0.000794391		1	0.0517856	0.020171	0.0069461	0.158225
Carbohydrates and carbohydrate conjugates	citrate	1	0.832024	0.777068	0.710721	0.701341		1	0.829287	0.834529	0.883505	0.882922		1	0.0173033	0.0238084	2.05819e-05	0.016814		1	0.100175	0.0780387	0.343184	0.255107
Carbohydrates and carbohydrate conjugates	pyruvate	1	0.929498	0.757965	0.752925	0.678286		1	0.966987	0.958458	0.96424	0.9137		1	0.0500905	0.261605	0.0282274	0.00450029		1	0.216594	0.6809	0.47423	0.265383
Carbohydrates and carbohydrate conjugates	UDP-glucose	1	0.689174	0.786056	0.636104	0.667019		1	0.898727	0.825192	0.871528	0.872665		1	0.0173159	0.0410471	0.0138023	0.0279259		1	0.226752	0.035791	0.0252918	0.283811
Carbohydrates and carbohydrate conjugates	glucosamine	1	0.886692	0.606364	1.14992	1.59566		1	1.48795	1.10784	1.17191	1.27725		1	0.055941	0.355475	0.635845	0.488281		1	0.128144	0.637084	0.600739	0.557468
Carbohydrates and carbohydrate conjugates	verbascose	1	0.637201	0.692554	0.676895	1.13634		1	1.02955	0.780652	0.859186	0.932924		1	0.0380099	0.177387	0.0829454	0.352399		1	0.675521	0.24404	0.633535	0.626875
Carbohydrates and carbohydrate conjugates	adipic acid	1	1.19132	1.21244	0.952559	1.0165		1	0.829602	0.958895	0.990153	1.01648		1	0.110387	0.311414	0.812158	0.917003		1	0.539787	0.523031	0.927851	0.782647
Carbohydrates and carbohydrate conjugates	glucose 6-phosphate	1	0.994322	0.688231	0.678161	0.697687		1	1.3854	0.988034	1.17505	1.03456		1	0.943974	0.262469	0.0837978	0.164105		1	0.0741191	0.812243	0.253304	0.808175
Cinnamic acids and derivatives	o-coumaric acid	1	0.594571	0.4825	0.482747	0.381111		1	0.657653	0.487969	0.435634	0.38661		1	0.00237453	0.00115096	0.00645516	0.00272349		1	0.0454751	0.00713205	0.00730461	0.006621
Cinnamic acids and derivatives	coumaric acid hexoside	1	0.573964	0.474973	0.464623	0.385513		1	0.686495	0.515919	0.460262	0.411096		1	0.00381476	0.00179377	0.00351503	0.000393265		1	0.0290385	0.00308373	0.00130609	0.0014454
Cinnamic acids and derivatives	ferulate	1	0.887374	0.595131	0.741681	0.526158		1	0.862014	0.565942	0.480439	0.413357		1	0.333133	0.255007	0.344378	0.0924389		1	0.26381	0.0368962	0.0552097	0.00228978
Cinnamic acids and derivatives	3-O-feruloylquinic acid	1	0.67002	0.486611	0.502121	0.676802		1	0.654564	0.574473	0.437725	0.452538		1	0.0103212	0.0598151	0.0548465	0.0941613		1	0.0591955	0.0590461	0.00803157	0.0212555
Cinnamic acids and derivatives	sinapic acid #1	1	0.674581	0.59689	0.706401	0.504044		1	0.653474	0.496038	0.390628	0.489771		1	0.0207851	0.015849	0.0606323	0.0424307		1	0.00859065	0.025903	0.00471968	0.036667
Cinnamic acids and derivatives	p-coumaric acid	1	0.880672	0.493958	0.627627	0.421849		1	0.725282	0.605334	0.614575	0.587005		1	0.163516	0.0195145	0.035538	0.00583171		1	0.0311686	0.00879117	0.00588887	0.00560594
Cinnamic acids and derivatives	p-coumaroyl tartaric acid	1	0.895346	0.521689	0.654198	0.444991		1	0.799853	0.691306	0.709818	0.696292		1	0.166731	0.0116301	0.0298254	0.00358479		1	0.0332853	0.0169188	0.00254392	0.00590921
Cinnamic acids and derivatives	caffeoyltartaric acid	1	0.896512	0.617353	0.744794	0.606348		1	0.881458	0.787885	0.773252	0.793207		1	0.0624159	0.013702	0.0313396	0.00758709		1	0.159797	0.0405314	0.0122613	0.0136866
Cinnamic acids and derivatives	salicylic acid 2-C-β-D-glucopyranoside	1	0.888912	2.64108	3.02146	4.59174		1	0.770392	0.810128	1.12711	1.4433		1	0.683282	0.0179031	0.00441169	0.000844475		1	0.399733	0.588899	0.300892	0.00147078
Cinnamic acids and derivatives	p-Coumaroyl quinic acid	1	1.26047	0.851162	1.4319	1.28857		1	1.21972	1.52682	1.77468	1.82798		1	0.308303	0.0227668	0.090672	0.270439		1	0.206842	0.16733	0.0694101	0.0105268
Cinnamic acids and derivatives	caffeic acid	1	0.898934	0.821006	0.845792	0.811791		1	1.62521	2.05562	2.04637	2.45991		1	0.567203	0.116585	0.499837	0.185988		1	0.150437	0.0387915	0.0295789	0.0124548
Cinnamic acids and derivatives	caffeic acid-O-hexoside #2	1	0.818372	0.975745	1.37705	1.27075		1	0.813491	0.839266	0.865736	0.930722		1	0.0452416	0.0702981	0.0253335	0.0205787		1	0.0579956	0.000994498	0.0269984	0.0962197
Cinnamic acids and derivatives	cis-3,4,5-trimethoxycinnamic acid	1	1.28353	1.28488	1.01568	1.04529		1	1.3112	1.4299	1.62648	1.2971		1	0.0196398	0.0387359	0.819602	0.403625		1	0.109872	0.0157204	0.0602101	0.119333
Cinnamic acids and derivatives	caffeic acid-O-hexoside #1	1	0.723169	0.874386	1.20271	1.22253		1	0.746859	0.508847	0.518609	0.622335		1	0.0232013	0.0423377	0.117084	0.059236		1	0.00848631	0.150683	0.169295	0.310295
Cinnamic acids and derivatives	salicylic acid 2-O-β-D-glucopyranoside	1	0.550607	0.508021	0.415431	0.355099		1	0.981777	1.10959	0.921946	1.01338		1	0.0064464	0.00375481	0.0011969	0.0015174		1	0.5894	0.139289	0.0793664	0.529858
Cofactors, Prosthetic Groups, Electron Carriers	pantothenate	1	0.996761	1.51578	2.80648	3.38329		1	0.570706	0.745834	1.0104	1.50694		1	0.945761	0.0234648	0.00472573	0.000918153		1	0.00177783	0.0102853	0.098977	0.00588579
Cofactors, Prosthetic Groups, Electron Carriers	nicotinamide	1	1.37983	1.59225	1.36127	1.552		1	1.30993	1.50498	1.66562	1.87863		1	0.174575	0.175651	0.0807551	0.0793975		1	0.147936	0.0926607	0.0838122	0.0430599
Cofactors, Prosthetic Groups, Electron Carriers	nicotinate	1	1.337	1.19482	1.05968	1.35098		1	3.70496	4.67322	3.31408	2.98218		1	0.064027	0.0418973	0.4392	0.133068		1	0.0151105	0.00657176	0.00458059	0.00781448
Cofactors, Prosthetic Groups, Electron Carriers	pyridoxal	1	1.30114	2.77886	3.39138	5.06774		1	1.44731	2.15053	2.75845	6.80991		1	0.0850593	0.00183262	0.00981436	0.0286081		1	0.0980089	0.0110187	0.0142889	0.00119995
Cofactors, Prosthetic Groups, Electron Carriers	pyridoxamine (vitamin B6)	1	1.85708	1.9914	2.02001	1.8661		1	3.6609	6.75066	7.68568	8.26159		1	0.0775202	0.11036	0.0212713	0.0119286		1	0.0166577	0.028409	0.0398788	0.0166414
Cofactors, Prosthetic Groups, Electron Carriers	riboflavin (vitamin B2)	1	2.57861	7.80653	13.5368	16.7863		1	1.57647	4.19937	8.96796	12.1878		1	0.000911994	0.00256228	0.00159113	0.00273673		1	0.0902412	0.0041123	0.0029996	0.00300396
Cofactors, Prosthetic Groups, Electron Carriers	pyridoxine (vitamin B6)	1	1.27718	0.962291	1.14875	1.01955		1	1.1133	1.39057	1.13276	1.25772		1	0.00399017	0.833029	0.332915	0.958027		1	0.444231	0.244364	0.610304	0.109735
Cofactors, Prosthetic Groups, Electron Carriers	pheophorbide A	1	1.16892	1.14387	2.14111	1.27843		1	1.27761	2.03343	2.28069	2.63506		1	0.54671	0.374557	0.166006	0.531005		1	0.268519	0.0773921	0.204095	0.159545
Cofactors, Prosthetic Groups, Electron Carriers	ascorbate (Vitamin C)	1	1.25895	1.59758	1.5122	1.40525		1	1.15717	1.40706	1.49365	2.76378		1	0.122055	0.00833591	0.0507538	0.00576542		1	0.146505	0.0298732	0.0238564	0.232294
Cofactors, Prosthetic Groups, Electron Carriers	trigonelline (N'-methylnicotinate)	1	0.439623	0.405158	0.345733	0.557018		1	2.23901	1.59418	1.12078	0.554		1	0.000405305	0.00247405	0.00182303	0.00661584		1	0.00169166	0.0180461	0.0167828	0.256775
Cofactors, Prosthetic Groups, Electron Carriers	threonate	1	0.554464	0.310124	0.406998	0.305339		1	1.53378	0.851742	0.723536	0.6248		1	0.0496832	0.0478759	0.0306629	0.0232149		1	0.249267	0.600254	0.446602	0.313167
Ellagic acd and conjugates	ellagic acid xyloside	1	1.75169	1.89124	4.5321	3.34829		1	1.99859	3.52021	1.61774	3.04963		1	0.001428	0.148172	0.0218434	0.0627731		1	0.225868	0.0107569	0.289284	0.00147176
Ellagic acd and conjugates	ellagic acid hexoside	1	1.33837	1.54933	2.19704	1.71351		1	1.78186	2.30732	1.49792	2.0865		1	0.166701	0.431475	0.237843	0.236892		1	0.039399	0.133317	0.205102	0.214354
Flavonoids	myricetin-3-O-hexoside #2	1	0.935542	0.849388	1.2207	1.56814		1	0.586773	0.321689	0.21456	0.179944		1	0.302005	0.0202462	0.077883	0.0183364		1	0.00353182	0.000182503	6.94974e-05	0.000758678
Flavonoids	epicatechin gallate	1	0.422931	0.193449	0.255052	0.354338		1	0.62768	0.278383	0.174714	0.212826		1	0.0142925	0.00315567	0.00262098	0.0097335		1	0.0516101	0.00381564	0.00412019	0.00448754
Flavonoids	Catechin	1	0.655812	0.204617	0.244229	0.106455		1	0.688208	0.507409	0.380706	0.283994		1	0.0595424	0.00970427	0.00770127	0.00611819		1	0.0176081	0.0055112	0.00170539	0.00176495
Flavonoids	eriodictyol	1	1.56119	0.480905	0.61901	0.555333		1	0.318651	0.229503	0.0946975	0.303315		1	0.133138	0.0552985	0.226571	0.0332149		1	0.0606719	0.0273286	0.0257429	0.0356114
Flavonoids	epigallocatechin	1	0.687474	0.242672	0.333989	0.190336		1	0.517942	0.409701	0.357374	0.322469		1	0.36307	0.0639547	0.0666568	0.0454261		1	0.00404949	0.0108857	0.00529087	0.00527061
Flavonoids	cyanidin-3-O-glucoside #1	1	0.614009	0.439637	0.481545	0.296887		1	0.612341	0.509631	0.406261	0.347057		1	0.0868087	0.214772	0.00981475	0.00630777		1	0.0392542	0.0257068	0.00368528	0.0108479
Flavonoids	swertisin	1	0.829319	0.551716	0.605501	0.490238		1	0.712442	0.574464	0.457062	0.402525		1	0.108379	0.00409188	0.00860591	0.0018911		1	0.000182435	0.00111847	0.000149139	3.31336e-05
Flavonoids	procyanidin dimer B2	1	0.8364	0.501869	0.584417	0.300909		1	0.479121	0.566353	0.498755	0.454968		1	0.268504	0.00970955	0.0156854	0.00990526		1	0.146963	0.00139355	0.00727453	0.00320536
Flavonoids	naringenin chalcone hexoside	1	0.735755	0.448417	0.777693	0.579194		1	0.722141	0.574356	0.491866	0.456389		1	0.447598	0.181778	0.55917	0.28921		1	0.260804	0.101732	0.183184	0.0341919
Flavonoids	swertisin	1	0.701043	0.528201	0.511181	0.558839		1	0.745588	0.630781	0.502027	0.462226		1	0.169345	0.0367269	0.0587002	0.0171392		1	0.0309941	0.0231784	0.00128287	0.00237691
Flavonoids	procyanidin dimer B4	1	0.791809	0.378228	0.436635	0.205801		1	0.736214	0.610557	0.548873	0.492563		1	0.0109992	0.00181215	0.00222867	0.00051521		1	0.00964166	0.00650646	0.00101883	0.00181713
Flavonoids	procyanidin-O-gallate #2	1	0.918178	0.477245	0.647328	0.314841		1	0.710248	0.57209	0.485903	0.506497		1	0.370161	0.000694528	0.0074035	0.0138935		1	0.0132641	0.00209437	0.000468856	0.000526715
Flavonoids	cyanidin 3-O-(6''-caffeoyl-glucoside) #2	1	0.703894	0.429915	0.532914	0.455586		1	0.735746	0.659705	0.65447	0.507289		1	0.0936336	0.00873876	0.132767	0.117823		1	0.0336765	0.0117496	0.0642921	0.00174669
Flavonoids	luteolin 7-O-glucoside	1	0.79962	0.633908	0.594065	0.434927		1	0.818245	0.667798	0.57679	0.582035		1	0.00135402	0.0186289	0.0127588	0.00689747		1	0.00778316	0.0178062	0.0140679	0.00224476
Flavonoids	delphinidin-3-O-(6''-O-alpha-rhamnopyranosyl-beta-glucopyranoside)	1	0.614655	0.582168	0.688708	0.753372		1	0.637686	0.573716	0.700043	0.586672		1	0.00369326	0.0208556	0.00665801	0.116962		1	0.00104556	0.0425549	0.0180781	0.0344864
Flavonoids	cyanidin 3-O-(6''-caffeoyl-glucoside) #1	1	0.762001	0.338432	0.54331	0.383268		1	0.793183	0.710398	0.665906	0.661931		1	0.532995	0.100495	0.193833	0.178802		1	0.238456	0.0211829	0.0672423	0.032852
Flavonoids	rutin	1	0.667473	0.861929	1.06632	1.46572		1	0.661796	0.634627	0.798233	0.718204		1	0.000424811	0.0408035	0.328786	0.031449		1	0.00111527	0.00610111	0.0210818	0.00127552
Flavonoids	procyanidin dimer B1	1	0.998339	0.674469	0.797938	0.46583		1	0.851133	0.785397	0.741963	0.724879		1	0.871134	0.0047249	0.0152269	0.00427557		1	0.0735189	0.0172122	0.000421775	0.00339293
Flavonoids	astilbin #2	1	0.85904	0.672292	0.815997	0.615903		1	0.705278	0.706619	0.698652	0.74787		1	0.0578794	0.0142256	0.102306	0.00339739		1	0.0105842	0.00959096	0.000503752	0.00982777
Flavonoids	astilbin #3	1	0.736281	0.640166	0.673003	0.534779		1	0.760988	0.733444	0.663877	0.759464		1	0.0397972	0.00279216	0.00968087	0.0195079		1	0.0588319	0.0291857	0.0185028	0.0349096
Flavonoids	dihydroquercetin-O-hexoside #1	1	0.917009	0.808671	0.919703	0.711573		1	0.696573	0.734809	0.693195	0.787367		1	0.206955	0.0237095	0.240294	0.00146892		1	0.0318256	0.034102	0.00420417	0.0159682
Flavonoids	procyanidin-O-gallate #1	1	0.853593	0.623907	0.819676	0.450158		1	0.869841	0.736638	0.796547	0.810851		1	0.100143	0.000385167	0.0352622	0.019023		1	0.109465	0.0187137	0.0113783	0.00734386
Flavonoids	dihydroquercetin-O-hexoside #2	1	1.40218	1.20797	1.37737	1.75061		1	0.697861	0.799711	0.787401	1.10797		1	0.0504138	0.0174767	0.0438926	0.0335107		1	0.0152642	0.0378955	0.000357216	0.017506
Flavonoids	procyanidin dimer B3	1	1.03476	0.960757	1.5235	1.13252		1	0.869188	0.749072	0.982716	1.16638		1	0.0518524	0.0771318	0.0171724	0.249084		1	0.0445699	0.0224374	0.311266	0.00565202
Flavonoids	luteolin-di-pentoside	1	1.14996	0.636304	1.39394	0.911449		1	1.26746	1.29173	1.29508	1.41843		1	0.506468	0.0272364	0.0730814	0.609394		1	0.109977	0.365461	0.0259122	0.0471174
Flavonoids	cyanidin-3-O-glucoside #2	1	0.870757	3.46965	6.09598	17.8094		1	0.73562	0.71575	0.947545	1.66447		1	0.509428	0.0190508	9.01574e-05	0.0355974		1	0.0461647	0.0876336	0.58175	0.047536
Flavonoids	Luteoforol	1	2.51341	1.41473	2.00036	1.04224		1	0.76447	1.18465	1.77741	1.9963		1	0.0227486	0.110598	0.000806379	0.848097		1	0.00373041	0.303665	0.0165515	0.0352131
Flavonoids	rhamnetin	1	1.87971	1.97772	1.95102	2.41825		1	1.56667	2.02929	2.38448	2.24099		1	0.176022	0.213418	0.223995	0.0909612		1	0.221694	0.143614	0.0294739	0.0311375
Flavonoids	tricin 7-O-β-D-glucopyranoside	1	2.7066	4.16881	4.28855	4.65381		1	0.603142	1.0666	1.44672	2.24893		1	0.0232491	0.00230993	0.000804244	0.0225645		1	0.0724697	0.401561	0.0400075	0.0182547
Flavonoids	astilbin #1	1	1.87105	1.54437	1.95843	2.54503		1	0.846624	1.25215	1.30234	2.25429		1	0.013224	0.0340729	0.00506469	0.0460628		1	0.0304755	0.0159013	0.0496231	0.00578565
Flavonoids	chrysoeriol-O-hexoside	1	2.02749	2.45245	2.17192	2.2275		1	1.07812	1.63237	1.86759	2.47315		1	0.013083	0.0032822	0.0147545	0.00554124		1	0.611729	0.000110649	0.0139608	0.0045979
Flavonoids	myricetin-3-O-hexoside #1	1	3.6655	6.36113	12.3548	18.3331		1	0.866727	1.03135	1.28069	2.47652		1	0.010315	0.00138563	0.00294004	0.0175207		1	0.0195022	0.717751	0.00268082	0.000712286
Flavonoids	naringenin chalcone-C-pentoside-O-hexoside	1	0.94011	1.23473	1.8371	2.03439		1	1.24504	1.31752	1.83933	2.56812		1	0.474649	0.114318	0.00280379	0.00396571		1	0.152443	0.0356515	0.00871573	0.0024267
Flavonoids	Epicatechin	1	2.84248	1.7974	2.50734	1.43693		1	0.827396	1.35941	2.27085	2.64414		1	0.0239328	0.0694384	0.0105317	0.19343		1	0.0743524	0.0100917	0.00165753	5.09337e-05
Flavonoids	isovitexin	1	2.23795	1.73053	2.78504	2.11455		1	0.896732	1.5392	2.69172	3.4294		1	0.109482	0.201759	0.102	0.0047172		1	0.563926	0.00627152	0.060181	0.0512492
Flavonoids	isorhamnetin	1	6.48919	12.9463	5.1567	9.87511		1	1	2.7351	2.76721	3.84187		1	0.107949	0.0036538	0.0844069	0.0466926		1		0.183574	0.0221205	0.0252196
Flavonoids	cyanidin-3-O-glucoside #3	1	1.24525	1.41257	2.26291	1.64847		1	1.32034	2.42232	3.21654	3.91529		1	0.140714	0.0225123	0.00958265	0.111895		1	0.283161	0.0382425	0.0370165	0.0284934
Flavonoids	delphinidin 3-O-glucoside #2	1	1.96571	4.30376	6.68631	13.6631		1	0.855394	1.61998	2.03787	4.32377		1	0.00751781	0.0155602	0.0101263	0.0326821		1	0.0724696	0.117705	0.0447693	0.0281226
Flavonoids	quercetin 3-D-galactoside	1	2.14426	5.18943	7.45111	15.6326		1	0.911982	1.70738	2.3628	5.17169		1	0.00171089	0.00174562	0.00233789	0.00266719		1	0.0768882	0.0146533	0.000717327	0.000365131
Flavonoids	quercetin-3-O-rhamnoside #1	1	1.57327	1.90644	3.11424	2.36561		1	1.32457	2.8944	4.2269	5.36414		1	0.00855176	0.0138622	0.0031319	0.000214978		1	0.00633529	0.00318816	0.000263107	0.00034594
Flavonoids	chalcone 2'-O-glucoside	1	1.93294	1.89112	3.18381	1.27912		1	1.24901	3.05278	3.83627	5.94692		1	0.00127007	0.00187255	0.00112828	0.00601062		1	0.045202	0.00251816	0.000334093	0.000422694
Flavonoids	naringenin	1	3.70124	1.08453	1.54948	1.42772		1	0.931724	0.871669	2.56348	6.14402		1	0.133332	0.574575	0.000600965	0.525928		1	0.603988	0.486244	0.0139365	0.0341396
Flavonoids	isoorientin-7,2''-di-O-glucoside	1	16.2746	19.6771	24.8846	22.0136		1	0.89576	1.09108	3.42418	7.09829		1	0.00454326	0.00309303	0.00507194	0.0095275		1	0.696673	0.695515	0.113338	0.0356589
Flavonoids	isorhamnetin-O-rhamnoside	1	3.00792	2.86538	3.46131	2.47533		1	1.83766	4.99281	6.06708	9.41475		1	0.00194092	0.000841879	0.00279136	0.0172471		1	0.165156	0.00543577	0.0163717	0.00114296
Flavonoids	syringetin 3-O-β-D-glucopyranoside	1	8.27968	20.0667	30.923	39.3867		1	0.797083	2.86936	5.07817	11.7784		1	0.0004877	0.000469714	0.000644625	0.00253219		1	0.245879	0.000742287	0.00222524	3.45546e-06
Flavonoids	isoorientin	1	5.46367	4.23774	5.30685	9.36893		1	2.19867	6.50448	8.46958	17.5261		1	0.0267522	0.0107347	0.0263889	0.122124		1	0.0997876	0.00271342	0.00431694	0.0171512
Flavonoids	chrysoeriol C-glucoside #2	1	19.9863	22.007	15.5213	28.6959		1	1.38912	7.91644	10.4292	26.2699		1	0.00132795	0.00621175	0.00503935	0.00527062		1	0.204542	0.0013664	0.00756331	0.00714696
Flavonoids	tricin 4'-O-(syringyl alcohol)ether O-hexoside	1	18.7591	34.4706	40.4561	47.2896		1	1.61109	4.01972	8.89397	26.7925		1	0.00819613	0.00637215	0.00746385	0.0150882		1	0.217376	0.0692126	0.0109294	0.0261017
Flavonoids	quercetin-3-O-rutinoside #2	1	46.3087	99.3969	106.409	154.754		1	1.10294	5.30281	24.3321	49.7166		1	0.01441	0.0113998	0.0147833	0.0284514		1	0.829138	0.0666999	0.00977363	0.00378233
Flavonoids	petunidin 3-glucoside	1	7.28376	12.9564	23.0306	37.997		1	2.50278	11.8286	19.4031	50.5662		1	0.00209288	0.00994337	0.00880594	0.0304823		1	0.00198961	0.0169728	0.00706738	0.0182163
Flavonoids	apigenin 6-C-α-L-arabinosyl-8-C-β-L-arabinoside	1	15.4564	39.0959	47.0431	63.5793		1	2.28568	8.23	15.1516	50.9055		1	4.98657e-05	0.00143248	0.00102304	0.00192131		1	0.325909	0.00412004	0.00130974	4.73339e-05
Flavonoids	isoscoparin 2''-O-(6'''-(E)-feruloyl)-glucopyranoside	1	45.6019	51.451	46.9164	43.9121		1	2.39178	8.3965	24.704	67.9522		1	0.00786391	0.00984589	0.00437265	0.0163461		1	0.0302655	0.0149881	0.00319932	0.000854591
Flavonoids	peonidin 3-O-(6-O-coumaryl)-glucoside	1	38.8641	56.6163	53.038	74.3503		1	3.61048	38.4186	78.7893	209.159		1	0.00991547	0.0118968	0.00880716	0.0249061		1	0.000294611	0.023908	0.0163619	0.0210158
Flavonoids	isoscoparin	1	87.0979	185.156	186.307	229.002		1	2.36697	32.7684	76.8666	233.942		1	0.000113703	0.00136577	0.000379491	0.00182124		1	0.266354	0.00124711	0.000274987	2.92526e-05
Flavonoids	malvidin 3-O-(6-O-coumaryl)-glucoside	1	112.927	226.993	241.69	266.137		1	11.0127	253.637	666.338	2016.65		1	0.00855241	0.011489	0.00777181	0.0209524		1	0.00570931	0.0213469	0.0125681	0.0193457
Flavonoids	tricin 7-O-neohesperidoside	1	140.178	280.233	298.252	328.886		1	24.1848	658.243	1744.86	5275.64		1	0.00840259	0.011321	0.00742779	0.0211057		1	0.0032037	0.0205223	0.013321	0.0194482
Flavonoids	kaempferol-3-O-glucoside	1	0.710986	4.39629	7.86103	24.8672		1	0.491042	0.526206	1.02868	2.34899		1	0.0714973	0.00751485	0.00549071	0.00698007		1	0.0203286	0.0552899	0.877224	0.0562724
Flavonoids	chrysoeriol C-glucoside #1	1	7.40574	3.92329	5.67344	5.30703		1	1.26975	4.0263	6.93184	10.0469		1	0.0375652	0.000808399	0.0121233	0.0840891		1	0.508377	0.0651597	0.0814584	0.0630866
Flavonoids	morin	1	0.83158	0.948289	1.31866	1.15216		1	0.78259	0.930108	0.927761	1.23847		1	0.129014	0.523147	0.0383559	0.0710872		1	0.131536	0.465865	0.0583206	0.0634699
Flavonoids	dihydroquercetin	1	0.90068	0.438863	0.402478	1.26749		1	0.771889	0.63075	0.343191	1.92417		1	0.477917	0.0278598	0.0145123	0.220752		1	0.29578	0.125091	0.0308768	0.0678171
Flavonoids	procyanidin dimer B5	1	0.956202	0.753685	1.09027	0.695351		1	0.798785	0.648993	0.77836	0.865071		1	0.131293	0.0260128	0.0172146	0.0723713		1	0.0181054	0.0125752	0.00286984	0.0760478
Flavonoids	myricetin-3-O-glucuronide #1	1	0.708476	1.22982	2.50291	4.22058		1	0.61092	0.598602	0.75881	0.904028		1	0.00909354	0.126326	0.00829743	0.0137135		1	0.00219296	0.00739739	0.0010785	0.102007
Flavonoids	naringenin chalcone	1	1.23853	1.00166	1.32497	2.86096		1	0.679256	0.621684	0.597437	1.87843		1	0.14104	0.992011	0.302904	0.0195762		1	0.54921	0.458405	0.42265	0.168839
Flavonoids	isoorientin 7,3'-dimethyl ether	1	1.31257	0.632745	0.975436	1.06546		1	0.854981	0.733105	0.840066	0.752059		1	0.520818	0.338983	0.908936	0.833556		1	0.375312	0.196041	0.363263	0.253106
Flavonoids	C-hexosyl-methylchrysoeriol	1	0.943739	0.937124	1.04185	1.18515		1	1.03418	1.01389	1.12141	1.29957		1	0.136401	0.849384	0.739026	0.508863		1	0.835709	0.942127	0.57456	0.285637
Flavonoids	kaempferol-3-O-rhamnoside	1	1.17339	1.08241	1.86316	1.11075		1	0.787029	0.898736	1.19121	1.20588		1	0.0735597	0.540152	0.039429	0.473012		1	0.0685113	0.541983	0.0216855	0.287766
Flavonoids	delphinidin 3-O-glucoside #1	1	1.90495	1.49865	1.8324	3.26904		1	0.717395	0.807262	0.865307	1.13169		1	0.0357878	0.461201	0.0350303	0.199827		1	0.0314678	0.357388	0.22675	0.404534
Flavonoids	delphinidin 3,5-diglucoside	1	0.893929	1.23988	1.71639	2.91548		1	0.632317	0.566815	0.578702	1.28063		1	0.378058	0.0725215	0.0113954	0.0279721		1	0.0725978	0.0775426	0.0342095	0.410905
Flavonoids	quercetin	1	0.801228	1.06328	0.90968	2.06388		1	0.323901	0.304634	0.514919	1.09647		1	0.474896	0.821449	0.550746	0.0260238		1	0.00423848	0.00239612	0.0125261	0.59913
Flavonoids	kaempferol-3-O-rhamnoside-7-O-rhamnoside	1	1.51216	1.39903	2.12098	1.35782		1	0.699782	1.04269	1.05599	1.18269		1	0.363549	0.368232	0.0587698	0.269122		1	0.549685	0.911129	0.891973	0.668612
Flavonoids	quercetin-3-O-rhamnoside #2	1	0.955294	1.16739	1.24628	1.47698		1	0.780533	0.692138	0.868389	0.939234		1	0.0447818	0.456524	0.541356	0.278409		1	0.293404	0.165991	0.134156	0.724525
Flavonoids	kaempferol-7-O-rhamnoside	1	1.09497	1.1656	1.58949	1.42434		1	0.62727	0.685639	0.826129	0.969077		1	0.806551	0.344771	0.0802122	0.298877		1	0.202871	0.117857	0.513221	0.793781
Flavonoids	tricin O-glucoside O-guaiacylglyceryl ether	1	0.371658	0.202638	0.0491724	0.0491724		1	7.84876	5.98061	1	1		1	0.247675	0.109763	0.0525255	0.0525255		1	0.0281105	0.194227
Hydrolyzable Tannins	galloyl-HHDP-glucose #2	1	0.645456	0.256929	0.385044	0.392804		1	0.761429	0.552669	0.378522	0.450809		1	0.016161	0.00331019	0.00427763	0.0665654		1	0.151905	0.0367979	0.00651994	0.0285759
Hydrolyzable Tannins	monogalloyl glucose #1	1	0.80185	0.666023	0.915969	1.06487		1	0.651688	0.490848	0.492999	0.577798		1	0.0356544	0.01134	0.256891	0.362513		1	0.0107548	0.00110574	0.000100851	0.00230609
Hydrolyzable Tannins	monogalloyl glucose #2	1	0.801311	0.684314	0.780703	0.902436		1	0.732048	0.735755	0.65676	0.59358		1	0.0387338	0.00629131	0.0140733	0.27804		1	0.0144783	0.0221846	0.00636738	0.00408237
Hydrolyzable Tannins	monogalloyl glucose #4	1	1.05477	1.19294	1.61213	2.58501		1	0.687232	0.77191	0.981363	1.10444		1	0.131832	0.0280664	0.00516656	0.00299073		1	0.00724096	0.0100162	0.240788	0.0386422
Hydrolyzable Tannins	monogalloyl glucose #3	1	0.818526	0.651836	0.873191	0.624069		1	0.954055	0.967572	1.22123	3.16423		1	0.00373235	0.00129708	0.0133743	0.00338225		1	0.185637	0.294638	0.00716464	7.70396e-05
Hydrolyzable Tannins	digalloylglucose #2	1	5.52983	3.89651	4.05262	12.6254		1	2.49781	2.25773	3.38818	6.90118		1	0.00222277	0.00121259	0.048525	0.0123158		1	0.057658	0.0465954	0.00380539	0.0405037
Hydrolyzable Tannins	digalloylglucose #1	1	0.846869	0.362908	0.425351	0.25771		1	0.750816	0.90091	0.751185	0.742641		1	0.591924	0.0700522	0.0347821	0.0340123		1	0.276755	0.624708	0.179953	0.215821
Hydrolyzable Tannins	HHDP-digalloylglucose #2	1	0.861467	0.617307	0.599696	1.02635		1	1.10096	1.33631	0.816908	1.39669		1	0.696579	0.137052	0.121746	0.962816		1	0.482384	0.224607	0.209645	0.464912
Hydrolyzable Tannins	HHDP-digalloylglucose #1	1	1.26476	1.21914	0.983559	2.26815		1	1.01694	1.70268	0.778045	1.23271		1	0.442691	0.42265	0.963394	0.125301		1	0.94487	0.42265	0.42265	0.734448
Hydrolyzable Tannins	galloyl-HHDP-glucose #1	1	0.789082	0.861018	0.862668	0.639777		1	0.85482	0.609415	0.725504	1.15538		1	0.515081	0.397573	0.371942	0.044225		1	0.571116	0.0601834	0.234439	0.743025
Lactones	ribonolactone	1	1.24939	1.47475	1.42328	1.36319		1	1.38482	2.01559	2.24811	2.31688		1	0.13309	0.0818644	0.0696064	0.311854		1	0.00576085	0.000386318	0.00759063	0.00518124
Lineolic acids and derivatives	jasmonic acid	1	1.64395	1.96998	3.21554	5.73511		1	2.36735	10.9774	15.1284	27.3353		1	0.0662164	0.0867027	0.0156156	0.00997645		1	0.0400242	0.0311186	0.00691629	0.00900407
Lipids	sphinganine	1	0.125663	0.0831775	0.0393036	0.0989726		1	0.72626	0.136581	0.0971914	0.0873969		1	0.0174767	0.0247476	0.0243538	0.0266781		1	0.167545	0.0564334	0.0571781	0.0528101
Lipids	9-HOTrE	1	0.332959	0.132749	0.129622	0.352446		1	0.51835	0.186342	0.0910434	0.087675		1	0.00664511	0.00358121	0.00816484	0.0151899		1	0.00110427	0.00231862	0.000868924	0.000166436
Lipids	1-LysoPE(18:2)	1	0.612826	0.981414	1.18088	2.24174		1	0.118413	0.0433287	0.066129	0.114897		1	0.0317756	0.943318	0.402064	0.0494878		1	0.000273731	0.000368564	0.000332317	0.000494594
Lipids	1-LysoPE(18:3)	1	0.589165	0.648325	1.19743	3.28838		1	0.134687	0.0731797	0.104631	0.130937		1	0.407298	0.53374	0.619209	0.0662783		1	0.00164918	0.00187013	0.000585649	0.00228233
Lipids	2-palmitoylglycerol	1	0.289115	0.16028	0.228346	0.277853		1	0.250151	0.110792	0.105412	0.140167		1	0.0826585	0.0353268	0.0879171	0.099321		1	0.0403678	0.0228158	0.0251058	0.026739
Lipids	phytosphingosine	1	0.724637	0.548602	0.164434	0.308219		1	0.609534	0.400306	0.28988	0.198735		1	0.0513526	0.0424954	0.0166454	0.0180683		1	0.0526854	0.0833948	0.0525771	0.0297506
Lipids	2-LysoPE(18:2)	1	0.862246	1.44127	2.02934	3.7183		1	0.177175	0.104642	0.177716	0.289524		1	0.179759	0.293577	0.00459224	0.0252339		1	0.00032722	0.0011817	0.000443444	0.000460954
Lipids	phosphocholine	1	0.944161	0.866021	0.891713	0.590589		1	1.16215	0.945611	0.573768	0.305355		1	0.700873	0.693693	0.529363	0.115342		1	0.445932	0.625188	0.0872573	0.0354473
Lipids	ethanolamine	1	0.507166	0.418787	0.517317	0.556472		1	0.866337	0.498913	0.447189	0.411637		1	0.000655867	0.0610305	0.00244244	0.000967993		1	0.102998	0.0153183	0.00173463	0.00208044
Lipids	1-LysoPE(16:0)	1	0.958493	1.16944	1.42552	1.55838		1	0.342029	0.292392	0.368425	0.437618		1	0.712343	0.240077	0.0176305	0.0182761		1	0.00499108	0.00620165	0.00646354	0.00949159
Lipids	9-HODE	1	0.603211	0.530616	0.512871	0.669934		1	0.729695	0.429889	0.408237	0.444554		1	0.0580508	0.0519898	0.0462869	0.0911767		1	0.0643363	0.028734	0.0186085	0.0479871
Lipids	2-LysoPE(18:3)	1	0.791127	1.53831	3.51362	7.85545		1	0.151415	0.148531	0.228797	0.50574		1	0.33064	0.0430547	0.0445865	0.00428451		1	0.0168098	0.0223613	0.0215989	0.0492687
Lipids	13(S)-HOTrE	1	0.56094	0.551067	0.503393	0.622614		1	0.847559	0.71203	0.681777	0.600593		1	0.0209699	0.058751	0.00727794	0.0429732		1	0.0222104	0.0334351	0.0108058	0.00859274
Lipids	palmitate (16:0)	1	1.42052	1.18396	1.79401	0.925685		1	0.745853	0.716117	0.87703	0.775203		1	0.14441	0.622757	0.209872	0.661688		1	0.209549	0.218877	0.575299	0.0286626
Lipids	glycerol	1	1.04053	0.806144	1.09962	1.15547		1	1.67663	1.32935	1.29662	1.28846		1	0.286102	0.586683	0.0706268	0.132349		1	0.0248143	0.0545584	0.0443933	0.00109167
Lipids	2-LysoPE(18:1)	1	1.49638	2.52315	3.75829	5.98414		1	0.553288	0.685808	1.15367	1.49151		1	0.255747	0.0478358	0.0313459	0.00815838		1	0.0177354	0.0358915	0.153532	0.0165112
Lipids	choline	1	0.900035	1.07929	1.17778	1.15162		1	1.544	1.73403	1.88002	1.79088		1	0.147994	0.50359	0.12909	0.208705		1	0.0540749	0.0726831	0.0247587	0.0236817
Lipids	acetoacetate	1	1.41288	1.59113	1.59386	1.83504		1	2.56875	2.7882	2.70182	3.34933		1	0.0373718	0.0293261	0.0477463	0.099709		1	0.0013797	0.00931862	0.0043457	0.0380485
Lipids	3-hydroxy-3-methyl-Glutaric acid	1	4.6116	3.51979	2.46027	1.0634		1	3.52324	17.9503	20.9245	13.1188		1	0.000550226	0.000398314	0.00470096	0.183961		1	0.00390972	0.000193267	0.000433157	4.87534e-05
Lipids	pinolenic acid	1	0.708095	0.773504	0.673493	0.846589		1	0.675414	0.510858	0.684547	0.505138		1	0.153619	0.197597	0.0872665	0.201697		1	0.0333288	0.0498155	0.0911878	0.0669024
Lipids	sn-Glycero-3-phosphocholine	1	1.0957	0.538567	0.653312	0.669131		1	0.987933	0.60379	1.71619	1.91469		1	0.632169	0.156852	0.105692	0.315544		1	0.953464	0.159885	0.0456014	0.0917785
Lipids	1-LysoPE(18:1)	1	0.990999	1.21037	1.18945	1.45817		1	0.622188	0.564865	0.682295	0.746148		1	0.948539	0.0631837	0.151104	0.117753		1	0.0325753	0.052407	0.0992175	0.178542
Lipids	N-oleoyl-serine	1	1.46956	1.1039	0.932044	1.01471		1	2.44793	0.866791	0.818306	0.837969		1	0.0121091	0.514623	0.564227	0.917416		1	0.00584696	0.31583	0.0903951	0.236021
Lipids	tetradecylamine	1	1.38925	1.33164	0.971172	1.74049		1	0.762289	0.869576	0.353967	0.447412		1	0.712065	0.661281	0.923918	0.547702		1	0.61905	0.796308	0.258542	0.309815
Lipids	2-hydroxymyristic acid	1	1.15113	1.07106	1.33345	1.10461		1	0.634007	0.706827	0.679948	0.940502		1	0.485176	0.719232	0.198125	0.499568		1	0.246015	0.129539	0.00189011	0.483096
Lipids	9-OxoOTrE	1	0.595016	0.0771141	0.252482	0.160402		1	19.7061	7.84932	5.99445	1.35649		1	0.718047	0.432256	0.521857	0.504195		1	0.00846591	0.0415267	0.0486863	0.785983
Lipids	10-heptadecenoate (17:1n7)	1	0.998251	1.01465	1.01476	1.11122		1	1.02432	0.905741	0.94315	0.957249		1	0.983952	0.677653	0.904181	0.494229		1	0.839937	0.0380042	0.676132	0.836495
Lipids	phthalic acid mono-2-ethylhexyl Ester	1	0.919202	1.01571	1.01373	0.98757		1	0.977176	0.829344	1.03902	1.00259		1	0.197625	0.238227	0.886593	0.9412		1	0.734329	0.0799075	0.427734	0.966013
Lipids	arachidate (20:0)	1	1.24821	1.31124	1.31404	0.871378		1	1.07031	0.964336	1.04365	0.992961		1	0.29191	0.562819	0.68419	0.786754		1	0.496322	0.838331	0.916416	0.986846
Monoterpenol glycoconjugation	terpenyl-pentosyl-glucoside #3	1	1.98986	2.22604	2.54786	1.97901		1	1.49937	3.29867	3.70775	3.54902		1	0.000293183	0.00557624	0.000927687	0.00620558		1	0.00740166	0.00190284	0.000173963	0.00382161
Monoterpenol glycoconjugation	terpenyl-pentosyl-glucoside #2	1	3.31171	3.54633	5.0128	3.65964		1	1.12863	3.70647	4.71805	5.01801		1	0.000240185	0.00424656	3.38158e-05	0.00926684		1	0.187582	0.00415443	0.00480868	1.03372e-05
Monoterpenol glycoconjugation	terpenyl-pentosyl-glucoside #1	1	7.92858	12.9022	25.1253	20.4055		1	0.967548	8.35856	17.7599	36.9525		1	0.0018334	0.00169129	0.00016512	0.00331618		1	0.913166	0.00405599	0.00282708	0.000420109
Nucleotides	adenosine	1	0.667354	0.40038	0.521846	0.629002		1	0.714196	0.44878	0.306025	0.344643		1	0.0328906	0.00700125	0.0135786	0.093352		1	0.159556	0.00102447	0.0139685	0.0140745
Nucleotides	adenine	1	0.837452	0.817469	0.885548	0.852495		1	0.684085	0.642628	0.568179	0.565949		1	0.191792	0.224429	0.332904	0.191673		1	0.0539744	0.072187	0.0338101	0.0145459
Nucleotides	uridine monophosphate (5' or 3')	1	1.00907	1.08565	0.933501	1.34232		1	0.874381	0.879604	0.73005	0.705331		1	0.909509	0.23567	0.433539	0.110713		1	0.422179	0.293252	0.103257	0.00804117
Nucleotides	adenosine 5'-monophosphate	1	1.13535	1.22191	1.08628	1.60759		1	1.15518	1.24443	1.16369	1.33073		1	0.140143	0.0119405	0.172926	0.0814781		1	0.0593389	0.0114196	0.0264802	0.0535909
Nucleotides	cytidine	1	1.01715	0.705684	0.420388	0.680965		1	2.34192	2.40668	1.32714	1.33916		1	0.440015	0.0278828	0.000678651	0.0167325		1	0.0426424	0.052849	0.213619	0.0488094
Nucleotides	guanine	1	0.396435	0.215592	0.150096	0.372938		1	7.48181	3.27604	1.76936	1.55263		1	0.0106626	0.010121	0.0205279	0.0113932		1	0.00605028	0.0293108	0.00249806	0.00851544
Nucleotides	guanosine 5'- monophosphate (5'-GMP)	1	0.994911	1.08171	1.247	1.59152		1	1.31491	1.2786	1.42953	1.72362		1	0.862371	0.437845	0.011188	0.0122016		1	0.0468651	0.181358	0.0229564	0.0078408
Nucleotides	guanosine	1	0.380394	0.224338	0.224231	0.42885		1	8.37439	3.54445	1.86304	1.84391		1	0.00105306	0.000688355	0.00119733	0.00372971		1	0.00127668	0.000724828	0.00337872	0.000202641
Nucleotides	succinyladenosine	1	1.01503	1.10102	1.0305	1.00545		1	1.8916	2.45989	2.77655	2.62089		1	0.709844	0.131369	0.651678	0.938554		1	0.0038234	0.00230772	0.00124177	0.00208126
Nucleotides	urate	1	0.835606	0.985506	0.760639	1.25171		1	4.18159	2.99365	2.62861	4.16848		1	0.435776	0.767619	0.0953153	0.326973		1	0.0802922	0.0101631	0.0317109	0.0028874
Nucleotides	cytosine	1	4.31958	4.1701	7.45512	9.33963		1	1.12897	2.43074	3.56014	4.20433		1	0.00870697	0.231613	0.00114507	0.00133603		1	0.240149	0.0355041	0.0014082	0.000136053
Nucleotides	2'-deoxycytidine	1	1.69315	1.67084	1.88099	1.97314		1	6.34342	8.07041	6.79851	5.78347		1	0.0449768	0.455424	0.00345678	0.0605122		1	0.00327273	0.00972923	0.00236338	0.0420692
Nucleotides	uridine	1	30.4273	39.7033	50.205	86.0946		1	2.24548	41.7201	62.4052	78.835		1	0.0107354	0.00984657	0.011213	0.00690631		1	0.202831	0.0121834	0.0127629	0.00566504
Nucleotides	guanidine	1	1.12329	0.251216	0.272668	0.503542		1	0.807678	0.479059	0.320458	0.385837		1	0.726273	0.134563	0.111905	0.0801143		1	0.571007	0.164461	0.0571486	0.0727704
Nucleotides	guanosine 5'-diphosphate	1	0.325063	0.308041	0.259112	0.172261		1	0.25002	0.149533	0.222285	0.247616		1	0.0873517	0.118883	0.0968445	0.0754939		1	0.0759212	0.0413046	0.0513982	0.0740534
Nucleotides	agmatine	1	0.865811	0.749661	1.06178	2.14713		1	1.35198	1.74004	1.63786	2.58161		1	0.236628	0.0839638	0.155649	0.0162749		1	0.0360062	0.0646546	0.023099	0.104968
Nucleotides	uracil	1	1.43699	0.487315	0.710678	0.532644		1	0.166427	1.27585	0.230018	0.173077		1	0.109851	0.304592	0.514692	0.134333		1	0.21975	0.811194	0.184303	0.193518
Nucleotides	hypoxanthine	1	0.4008	0.18888	0.147639	0.142213		1	2.08388	1.663	0.972931	1.0169		1	0.0536236	0.0379617	0.0276758	0.03513		1	0.00162608	0.19202	0.58342	0.674627
Nucleotides	inosine	1	1.25262	1.56082	4.38773	6.40381		1	0.719164	0.291597	0.579473	0.797112		1	0.618747	0.591992	0.0542877	0.204004		1	0.722329	0.155732	0.452012	0.840069
Organic acids	quinate	1	0.806642	0.529012	0.688241	0.606171		1	1.26014	1.13133	0.941728	0.996526		1	0.00949996	0.139585	0.000285199	0.0157832		1	0.098763	0.172764	0.659628	0.978413
Organic acids	kynurenate	1	0.729956	0.441747	0.382359	0.262183		1	0.329096	0.164452	0.142018	0.0975652		1	0.0250079	0.000247484	0.00118536	0.000138582		1	0.00259353	0.0041332	0.00225139	0.00289313
Organic acids	propionic acid	1	0.713584	0.583449	0.444693	0.537454		1	2.07645	1.84735	1.10805	1.90835		1	0.000593537	0.00488432	0.00857441	0.00638973		1	0.000839141	0.00499973	0.0439073	0.00150933
Organic acids	4-Hydroxybutyric Acid	1	0.895327	0.971204	0.782344	0.777875		1	2.49991	2.16594	2.12229	2.85487		1	0.515319	0.87696	0.386306	0.37027		1	0.0405645	0.0317367	0.0447132	0.032465
Organic acids	trans-2-Hydroxycinnamate	1	1.19235	1.2046	1.31638	1.57357		1	1.56803	2.56128	2.25535	2.97654		1	0.0123702	0.0216177	0.0033808	0.0804249		1	0.0136522	0.0228069	0.00938713	0.0208557
Organic acids	aconitic acid	1	1.38492	1.53725	1.44951	1.43197		1	1.651	2.25616	2.82691	3.29827		1	0.0824591	0.0404181	0.081429	0.133282		1	0.0555499	0.0132507	0.0139642	0.00434155
Organic acids	azelaic acid	1	0.994687	0.991733	1.13379	1.03669		1	0.854867	0.882554	0.928369	0.868516		1	0.928869	0.820448	0.513613	0.729757		1	0.102704	0.0814088	0.104102	0.214701
Organic acids	malic acid	1	0.954556	0.997081	0.889549	0.891974		1	0.99375	0.979885	1.01862	1.05617		1	0.132576	0.969429	0.129559	0.0086368		1	0.941865	0.67907	0.75526	0.241916
Organic acids	maleic acid	1	0.916989	0.945417	0.794917	0.796843		1	0.996239	1.01447	1.07026	1.06573		1	0.0123337	0.369516	0.0249393	0.0353425		1	0.958925	0.801628	0.4778	0.381246
Organic acids	phenoxyacetic acid	1	1.18559	1.07836	1.01063	1.12467		1	0.870986	0.90501	0.931494	1.09921		1	0.088997	0.643916	0.65099	0.027675		1	0.288712	0.382061	0.518777	0.52063
Organic acids	indole-3-carbaldehyde	1	1.21697	1.73009	1.47694	1.67779		1	0.806944	0.874794	0.985238	1.18759		1	0.386645	0.0951508	0.18599	0.318766		1	0.176149	0.0874664	0.952941	0.604952
Organic acids	3-oxoglutaric acid	1	0.564854	0.488246	0.28374	0.260963		1	2.2565	1.16987	1.10501	1.0154		1	0.000232744	3.56542e-06	0.000273366	0.000207997		1	0.0047766	0.0761737	0.0628872	0.624477
Organic acids	salicylic acid	1	1.02896	1.04386	1.03386	1.06705		1	1.00132	1.00163	0.946432	0.99347		1	0.665378	0.635419	0.0295362	0.352917		1	0.985339	0.873899	0.328746	0.902895
Others	N,N'-Dicyclohexylurea	1	1.00015	1.05364	1.01076	1.0072		1	0.963309	0.929961	0.919434	0.949706		1	0.997512	0.55997	0.783789	0.910965		1	0.542135	0.256969	0.0336133	0.0372715
Others	phospho-diglucose	1	1.2252	1.30899	1.3039	1.28479		1	1.73734	2.00522	2.09046	2.34001		1	0.00531717	0.0342248	0.00768223	0.0486183		1	0.00757689	0.000619123	0.0103931	0.00323748
Others	dodecyl (dimethyl) amine oxide	1	1.01535	1.38805	1.33816	1.48393		1	1.05962	1.04667	1.40959	1.48908		1	0.91176	0.356677	0.491903	0.42895		1	0.445746	0.690543	0.019468	0.217853
Others	2-Amino-1,3,4-tetradecanetriol	1	0.8814	0.662643	0.616115	0.594024		1	1.10202	1.01032	0.954107	1.04316		1	0.706397	0.192098	0.209414	0.187934		1	0.682268	0.974204	0.837614	0.46958
Others	2-Amino-1,3,4,5-eicosanetetrol	1	0.879084	0.813546	0.709328	0.668546		1	0.954888	0.914243	0.892967	1.02757		1	0.661465	0.252166	0.277733	0.248673		1	0.743988	0.726557	0.594191	0.501597
Others	2-Amino-1,3-octadecanediol	1	0.960482	1.2245	0.912594	0.888821		1	0.856608	0.863324	0.995321	1.09909		1	0.788551	0.178916	0.505128	0.473317		1	0.214028	0.425923	0.98254	0.63911
Others	2-Amino-1,3-eicosanediol	1	0.920766	1.52693	0.979146	1.16363		1	0.658268	0.807221	1.06876	1.12758		1	0.569596	0.0292801	0.651811	0.0497668		1	0.0912396	0.517706	0.845957	0.738058
Others	tetrabutylammonium	1	1.02001	1.1004	1.00352	0.935593		1	1.15034	0.982794	1.15307	1.00051		1	0.844482	0.214135	0.968612	0.404459		1	0.60672	0.894128	0.265991	0.995119
Pteridines and derivatives	formyltetrahydrofolate	1	1.40498	2.15868	2.55009	2.97359		1	1.35855	2.04451	2.71229	2.96078		1	0.0571099	0.00857661	0.00696324	0.0038881		1	0.0167104	0.0960086	0.00849986	0.000150549
Stilbenes	trans-resveratrol 3-O-glucoside	1	1.06472	0.993059	2.88369	1.57417		1	1.53319	1.26713	2.59622	6.24866		1	0.494866	0.949015	0.00193907	0.186816		1	0.240017	0.116704	0.000738935	0.0013801
Amines	linoleoyl ethanolamide #1	1	1.29291	1.04595	0.959867	1.33388		1	6.11057	7.64516	5.73085	7.06677		1	0.121083	0.8536	0.718355	0.154608		1	0.00634044	0.0112014	0.00242566	0.000328166
Amines	linoleoyl ethanolamide #2	1	1.73418	2.06299	1.96981	2.44138		1	23.1565	35.9193	45.5059	60.7747		1	0.0124964	0.133776	0.0250817	0.0284031		1	0.00975555	0.0139807	0.00496418	0.00841485
Fatty Acyls	hydroxy-hexanoate-glucoside	1	0.650808	0.614726	0.651865	0.592068		1	0.873184	0.681245	0.703845	0.659213		1	0.00313956	0.00350936	0.00633893	0.00348884		1	0.0548937	0.0107815	0.000183822	0.00297604
Fatty Acyls	methylsuccinic acid	1	0.521446	0.534044	0.517632	0.512791		1	2.38888	2.17442	1.9993	1.81589		1	0.00121838	0.00830113	0.00389231	0.00140861		1	0.00085381	0.0176487	0.00149896	0.0798113
Fatty Acyls	itaconic acid	1	0.947174	0.625503	0.827187	0.900032		1	1.44834	1.59198	1.25444	1.77291		1	0.788924	0.174209	0.468981	0.735038		1	0.478031	0.2304	0.349904	0.285117
Fatty Acyls	oleamide	1	1.40406	1.86777	2.08299	0.938799		1	0.604531	0.987714	0.504159	1.20412		1	0.0302419	0.129207	0.236676	0.835455		1	0.135179	0.967641	0.10537	0.373993

## Sheet: Table S3
Supplementary Table S3. Changes in the levels of metabolites in skin between RR and RC.
					RR vs RC
					ratio					P-value					FDR
Metabolite Name	Formula	Mass	RT	Class	1st	2nd	3rd	4th	5th	1st	2nd	3rd	4th	5th	1st	2nd	3rd	4th	5th
linoleoyl ethanolamide #1	C20H37NO2	323.281	16.51	Amines	7.01612	1.48451	0.959889	1.17514	1.32432	0.00013278	0.0206931	0.771479	0.215406	0.00167131	0.000898578	0.0376355	0.853613	0.318713	0.00629455
linoleoyl ethanolamide #2	C20H35NO2	321.267	15.44	Amines	23.9691	1.79504	1.37664	1.03755	0.962863	0.000210138	0.0168164	0.207873	0.711498	0.777596	0.00119902	0.0324077	0.336061	0.793594	0.823003
caftaric acid-glutathione	C23H27N3O15S	617.117	4.5	Amino acid derivatives	3.71505	1.78789	1.05734	1.07367	3.06275	0.00258877	0.00471258	0.800452	0.706279	0.037466	0.00760942	0.0108838	0.872402	0.796969	0.0744188
2,6-diaminopimelic acid	C7H14N2O4	190.095	1.72	Amino acids, peptides, and analogues	1.1997	2.4863	3.06634	3.62094	3.94899	0.049431	2.54046e-05	0.408708	1.6546e-06	0.000183618	0.0836303	0.000254922	0.533336	9.59668e-05	0.00156615
glutamine	C5H10N2O3	146.069	1.79	Amino acids, peptides, and analogues	1.22917	0.60497	0.535668	0.186895	0.243512	0.0136526	0.00105832	0.0294465	1.83921e-05	1.85718e-07	0.0289994	0.00327628	0.0714077	0.000380979	2.69291e-05
glutamic acid	C5H9NO4	147.053	1.96	Amino acids, peptides, and analogues	1.36237	1.39621	1.01913	1.02418	0.866196	0.029341	0.000242589	0.594306	0.715476	0.0272024	0.0540395	0.00117656	0.689016	0.794973	0.0559482
phenylalanine	C9H11NO2	165.079	4.48	Amino acids, peptides, and analogues	1.55951	1.81751	1.72975	2.26816	1.62059	0.000159215	5.8955e-06	6.85599e-05	4.70206e-05	0.000390964	0.000985778	0.000122542	0.000798038	0.000592869	0.00246477				im
N-acetylleucine	C8H15NO3	173.105	5.93	Amino acids, peptides, and analogues	1.61245	1.04334	0.91349	0.754001	0.584556	0.00501849	0.71102	0.411307	0.0636386	0.000113581	0.0132762	0.77204	0.534332	0.118303	0.00113581
N-acetylisoleucine	C8H15NO3	173.105	5.83	Amino acids, peptides, and analogues	1.62438	1.05046	0.845288	0.746598	0.581091	0.000594511	0.507719	0.168788	0.133172	0.0117372	0.00233787	0.610522	0.282283	0.219431	0.0272303
symmetric dimethylarginine	C8H18N4O2	202.143	1.74	Amino acids, peptides, and analogues	1.65789	1.49204	1.1579	0.694108	0.541334	0.00622614	0.00108561	0.149972	0.00468351	0.00857059	0.0157548	0.00332541	0.262903	0.0137194	0.0214265
isoleucine	C6H13NO2	131.095	3.85	Amino acids, peptides, and analogues	1.85545	2.60875	2.40055	2.73902	1.66524	0.000166082	5.63715e-05	4.69124e-05	2.64607e-05	0.000469357	0.00100687	0.000431687	0.000758417	0.000426312	0.00266889
argininosuccinate	C10H18N4O6	290.122	1.88	Amino acids, peptides, and analogues	1.93778	0.671987	0.952615	1.09127	0.9965	0.000116463	0.564882	0.484517	0.269835	0.938519	0.00086899	0.662826	0.599976	0.374412	0.958347
N-acetylmethionine	C7H13NO3S	191.061	5.18	Amino acids, peptides, and analogues	2.01262	1.14681	0.953835	0.667782	0.708574	0.0143034	0.74344	0.36881	0.0719731	0.0125084	0.0299446	0.798306	0.501512	0.12805	0.0285624
cysteine	C3H7NO2S	121.019	1.87	Amino acids, peptides, and analogues	2.14442	2.91156	1.64536	1.77456	2.30224	0.0294064	0.0217362	0.00443636	0.0449699	0.000976848	0.0538193	0.0392872	0.0157437	0.0899397	0.00429221
methionine	C5H11NO2S	149.051	2.52	Amino acids, peptides, and analogues	2.17854	12.1907	2.20644	2.72007	1.61959	0.00689138	3.75349e-06	0.00389457	0.00115496	0.0562425	0.016852	0.000136533	0.0147184	0.00458818	0.106603
leucine	C6H13NO2	131.095	3.96	Amino acids, peptides, and analogues	2.40308	3.64607	2.09894	2.19732	1.12058	1.7673e-07	2.1986e-06	2.03842e-05	2.51831e-05	0.0885559	2.57142e-05	9.13988e-05	0.000494318	0.000456444	0.15378
glutathione (oxidized)	C20H32N6O12S2	612.152	3.78	Amino acids, peptides, and analogues	2.40973	1.90015	0.77153	0.176909	0.0731952	0.00397889	0.00502494	0.0993891	0.00822896	0.000309842	0.0109232	0.0113353	0.19675	0.0213071	0.00236458
tyrosine	C9H11NO3	181.074	3.85	Amino acids, peptides, and analogues	2.57664	1.88822	1.16155	1.41369	1.26456	0.00023984	0.0017443	0.289779	0.0214411	0.153518	0.00126897	0.00497638	0.430234	0.0471054	0.244616
glycine	C2H5NO2	75.032	1.54	Amino acids, peptides, and analogues	2.62673	2.00458	1.83707	3.31089	3.85117	0.000229482	0.000207935	0.939268	0.000141918	0.000269655	0.00125999	0.00108052	0.969245	0.00105529	0.00217222
glutamyl-leucine	C11H20N2O5	260.135	4.9	Amino acids, peptides, and analogues	2.6458	4.11204	1.61169	1.74497	1.12095	0.00533208	0.000299985	0.0149568	0.00215422	0.476648	0.0138539	0.00143108	0.0399306	0.00726422	0.588203
proline	C5H9NO2	115.063	1.75	Amino acids, peptides, and analogues	2.90246	10.6757	4.96635	6.78338	4.06762	9.26513e-05	3.93719e-06	7.31801e-06	1.68803e-05	0.00183064	0.000898718	0.000127303	0.000266193	0.00040794	0.00680622
lysine	C6H14N2O2	146.106	1.44	Amino acids, peptides, and analogues	2.92841	2.04933	1.02708	1.47137	1.4156	9.30474e-05	3.09847e-05	0.949611	0.000336588	0.0134615	0.000873445	0.000290857	0.973017	0.00177474	0.0304988
valine	C5H11NO2	117.079	2.11	Amino acids, peptides, and analogues	3.14161	4.54981	1.38105	1.61797	1.0105	1.70097e-05	0.00533037	0.150865	2.57621e-05	0.942833	0.000449985	0.0118408	0.262884	0.000439471	0.956019
norvaline	C5H11NO2	117.079	2.3	Amino acids, peptides, and analogues	3.15163	4.00303	1.57464	1.7889	1.05248	0.000245609	7.50052e-05	0.0652697	0.00676497	0.757811	0.00127629	0.000507593	0.137634	0.0185079	0.810941
histidine	C6H9N3O2	155.069	1.51	Amino acids, peptides, and analogues	3.24576	3.18929	2.10134	1.539	1.23694	0.00206739	4.92794e-07	0.00015702	0.000627409	0.0382128	0.00646892	7.17015e-05	0.00126925	0.00279921	0.0753858
ornithine	C5H12N2O2	132.09	1.51	Amino acids, peptides, and analogues	3.63371	1.07094	0.885654	0.861428	0.875079	0.000130217	0.343622	0.235151	0.14053	0.213754	0.000902217	0.444417	0.365931	0.227674	0.322857
arginine	C6H14N4O2	174.112	1.51	Amino acids, peptides, and analogues	3.65693	0.971623	0.858345	0.868247	0.830637	0.000109004	0.593675	0.0949465	0.0325881	0.0779484	0.000857298	0.685553	0.191871	0.067504	0.139537
pipecolic acid	C6H11NO2	129.08	2.41	Amino acids, peptides, and analogues	3.95968	3.59345	2.31468	1.54436	1.15588	0.00030662	1.85888e-05	0.00147598	0.0258757	0.660223	0.00141629	0.000208051	0.00671109	0.0539854	0.742111
N-acetylglutamate	C7H11NO5	189.064	3.62	Amino acids, peptides, and analogues	4.32874	2.0319	0.78984	1.00649	0.860836	4.94213e-05	0.00277483	0.23666	0.94116	0.463265	0.000575264	0.00708311	0.36632	0.978266	0.574131
N-acetylproline	C7H11NO3	157.074	4.93	Amino acids, peptides, and analogues	5.11615	9.31172	6.68878	7.0511	8.26753	0.0119613	0.000515158	7.48733e-05	0.00255551	5.38631e-06	0.0259756	0.00199881	0.000751314	0.00832694	0.000312406
S-methylcysteine	C4H9NO2S	135.035	1.88	Amino acids, peptides, and analogues	5.27553	5.00945	1.95212	2.8249	1.14647	0.0143045	0.000403428	0.0409614	0.00342248	0.610778	0.029733	0.00170141	0.0931232	0.0104476	0.70568
gamma-guanidinobutyric acid	C5H11N3O2	145.085	2.45	Amino acids, peptides, and analogues	5.54926	2.99502	1.22293	1.30173	1.18829	0.00223574	0.000452487	0.164268	0.154786	0.271192	0.00684842	0.00177938	0.276313	0.241332	0.381775
alanine	C3H7NO2	89.048	2.49	Amino acids, peptides, and analogues	6.02343	5.26004	1.43478	1.10438	0.970134	0.00159037	0.000546695	0.0122478	0.391459	0.729189	0.00525905	0.00209327	0.0349422	0.506799	0.786115
tryptophan	C11H12N2O2	204.09	5	Amino acids, peptides, and analogues	16.3718	7.53531	4.29336	2.23105	2.89421	4.2885e-06	7.97889e-06	5.13057e-05	7.50045e-05	2.7497e-05	0.000155994	0.00013658	0.000746498	0.000701655	0.000531608
citrulline	C6H13N3O3	175.092	1.65	Amino acids, peptides, and analogues	20.1131	1.20207	0.601125	1.26253	0.832457	3.43401e-07	0.00577544	0.326623	0.251928	0.366844	2.49824e-05	0.0126365	0.477625	0.358133	0.481378
glutathione (reduced)	C10H17N3O6S	307.084	2.62	Amino acids, peptides, and analogues	0.075618	0.916273	0.253573	0.0385161	0.0267792	0.00120123	0.634638	0.214776	0.0120852	0.000406549	0.00411245	0.721405	0.341529	0.0292058	0.00245623
tyramine	C8H11NO	137.083	3.93	Amino acids, peptides, and analogues	0.32601	0.0447929	0.320829	1.04738	0.753577	0.000439001	0.000423836	0.000287136	0.689382	0.433036	0.00182499	0.00173713	0.00198944	0.78709	0.548387
gamma-aminobutyrate (GABA)	C4H9NO2	103.064	1.63	Amino acids, peptides, and analogues	0.410556	1.37949	0.716033	0.91539	1.17338	0.000330255	0.0017557	0.366484	0.147643	0.428731	0.00147853	0.00496028	0.505435	0.23397	0.545316
homoserine	C4H9NO3	119.057	1.6	Amino acids, peptides, and analogues	0.566637	0.961007	1.46087	1.29289	1.23301	0.0143249	0.96401	0.0116311	0.171718	0.133814	0.0295641	0.984305	0.0338466	0.260723	0.216793
aspartate	C4H7NO4	133.038	1.57	Amino acids, peptides, and analogues	0.578822	0.613072	0.404092	0.461971	0.53672	0.000959362	0.00398555	0.135886	0.000589027	0.00166898	0.00336355	0.00950652	0.245608	0.00266903	0.00636847
methylbenzoate	C8H8O2	136.052	4.4	Amino acids, peptides, and analogues	0.618836	1.04478	0.873075	1.13005	0.704062	0.00338735	0.69895	0.398374	0.351721	0.0688521	0.0095701	0.767526	0.52694	0.461534	0.126374
N6-acetyllysine	C8H16N2O3	188.116	2.43	Amino acids, peptides, and analogues	0.62965	2.34238	2.29374	4.34235	2.47754	0.0168324	0.000425327	0.00199408	0.000544979	0.00918839	0.0337808	0.00171903	0.0081729	0.0025491	0.0225816
2-aminoadipic acid	C6H11NO4	161.069	1.94	Amino acids, peptides, and analogues	0.644564	1.00251	0.653195	0.65673	0.451198	0.0172416	0.996054	0.0371773	0.00374569	0.000366085	0.0343651	0.999488	0.0865489	0.0113151	0.00235921
asparagine	C4H8N2O3	132.053	1.53	Amino acids, peptides, and analogues	0.751636	0.464313	0.821817	0.724012	0.445624	0.0467097	6.60477e-05	0.00431299	0.00140624	5.58166e-05	0.0804291	0.000468778	0.0154948	0.00536591	0.00080934
spermidine	C7H19N3	145.158	1.29	Amino acids, peptides, and analogues	0.784688	1.20582	1.08555	0.597031	0.703924	0.610424	0.010835	0.778576	0.0386474	0.0835981	0.691181	0.0222041	0.854964	0.0789277	0.14693
pyroglutamic acid	C5H7NO3	129.041	1.58	Amino acids, peptides, and analogues	0.892377	0.762003	0.724674	0.450966	0.526396	0.268944	0.0627608	0.357254	0.000487984	0.00398542	0.341759	0.094629	0.497421	0.00235859	0.0127008
betaine	C5H12NO2	118.086	1.67	Amino acids, peptides, and analogues	1.10489	0.485652	0.575663	0.613986	1.24144	0.0595418	5.62582e-05	0.260717	0.000346833	0.012118	0.0978908	0.000442463	0.401421	0.0017961	0.0278907
4-acetamidobutanoate	C6H11NO3	145.074	2.49	Amino acids, peptides, and analogues	1.16535	0.660751	1.07707	1.00864	1.33392	0.213422	0.0153259	0.578732	0.961932	0.208916	0.278501	0.0299319	0.684598	0.978808	0.317203
serine	C3H7NO3	105.043	1.53	Amino acids, peptides, and analogues	1.21467	0.436119	0.39496	0.511105	0.655736	0.146262	6.43807e-05	3.88821e-05	6.14279e-05	0.00165021	0.199823	0.000480379	0.000707168	0.000614279	0.00655561
S-Methylmethionine	C6H13NO2S	163.066	3.94	Amino acids, peptides, and analogues	1.52541	4.3769	1.02458	1.40252	1.21032	0.0510658	3.21924e-05	0.853546	0.0178827	0.250599	0.0858969	0.000283878	0.913169	0.0405156	0.357998
N-acetylasparagine	C6H10N2O4	174.067	4.38	Amino acids, peptides, and analogues	1.61141	9.6222	3.74129	2.92545	2.31746	0.085089	0.02807	0.0429367	0.101914	0.151878	0.129638	0.0489124	0.0961122	0.175923	0.24334
trans-urocanate	C6H6N2O2	138.043	1.51	Amino acids, peptides, and analogues	2.27322	2.79512	1.85117	1.17781	1.23856	0.079822	0.00582762	0.0165719	0.243388	0.240075	0.123554	0.0126555	0.0438402	0.349419	0.349858
trimethyllysine	C9H21N2O2	189.16	4.48	Amino acid derivatives	2.82668	0.777932	0.348045	0.963897	0.931783	0.266278	0.683728	0.275549	0.83079	0.684402	0.339854	0.75652	0.415465	0.885768	0.763372
vanillate	C8H8O4	168.042	6.98	Benzene and substituted derivatives	0.469891	0.576254	1.08784	1.01805	1.24665	0.0346853	0.0181036	0.585632	0.953932	0.420546	0.0623051	0.033988	0.681676	0.977527	0.537262
syringic acid	C9H10O5	198.05	5.62	Benzene and substituted derivatives	0.629469	2.6368	0.955508	0.611277	0.587392	0.786851	0.558048	0.774488	0.488622	0.62124	0.83567	0.66013	0.853697	0.600425	0.70929
protocatechuic Acid O-hexoside #2	C13H16O9	316.079	4.56	Benzene and substituted derivatives	2.09765	1.59125	1.10621	1.049	0.480606	2.42759e-05	1.07677e-05	0.0343363	0.343356	8.71554e-06	0.000470953	0.00014921	0.0812346	0.452605	0.000252751
benzoic acid	C7H6O2	122.037	5.73	Benzene and substituted derivatives	0.943975	0.911131	0.641653	0.599366	0.526173	0.364735	0.0021198	0.000785135	0.000100014	4.71295e-05	0.451651	0.00581946	0.0040799	0.000878909	0.000803974
2-hydroxybenzaldehyde	C7H6O2	122.037	6.45	Benzene and substituted derivatives	0.175261	0.906809	1.29958	0.832259	0.738269	0.010362	0.384087	0.0928191	0.120906	0.017533	0.023195	0.481765	0.188884	0.202676	0.0379446
protocatechuic Acid O-hexoside #1	C13H16O9	316.079	4.24	Benzene and substituted derivatives	0.879927	2.51852	2.66739	2.83	1.61072	0.0915755	4.60482e-06	1.82374e-06	1.13152e-05	0.000675839	0.137363	0.000121818	0.000132677	0.000328141	0.00332192
gallic acid	C7H6O5	170.021	4.29	Benzene and substituted derivatives	0.941497	0.843195	0.852896	1.49614	1.7692	0.660262	0.140437	0.456875	0.00747785	0.00956217	0.733345	0.196476	0.578046	0.0195367	0.0233028
4-Nitrophenol	C6H5NO3	139.027	7.97	Benzene and substituted derivatives	0.876991	0.835936	0.898136	1.00283	0.926934	0.477933	0.0360239	0.0924826	0.948122	0.182012	0.572339	0.0599026	0.189524	0.975019	0.283782
3-cresotinic acid	C8H8O3	152.047	8.86	Benzene and substituted derivatives	1.04538	1.55029	1.19172	0.864412	1.16062	0.808235	0.123266	0.346789	0.477319	0.375593	0.84603	0.175835	0.487515	0.589032	0.48844
hydroxybenzoic acid-O-hexoside	C13H16O8	300.084	4.77	Benzene and substituted derivatives	0.348258	0.754031	0.667577	0.951696	1.69767	2.47419e-05	0.000892009	0.000113844	0.535808	0.487419	0.000449994	0.00291657	0.0010039	0.642084	0.591429
protocatechuic acid	C7H6O4	154.026	6.11	Benzene and substituted derivatives	1.10796	0.941648	1.33196	0.830555	0.909629	0.630642	0.730295	0.151153	0.305793	0.726584	0.711306	0.787096	0.26027	0.412466	0.789173
pyruvate	C3H4O3	88.016	2.13	Carbohydrates and carbohydrate conjugates	0.892639	0.858032	0.705913	0.697015	0.66265	0.0609053	0.027177	0.210689	0.00532174	0.00980727	0.09957	0.0485184	0.338731	0.0149835	0.023505
UDP-glucose	C15H24N2O17P2	566.055	1.98	Carbohydrates and carbohydrate conjugates	0.935418	0.71731	0.891054	0.682735	0.714984	0.524395	0.0534548	0.206408	0.0180587	0.00197146	0.615318	0.0823034	0.335558	0.040597	0.00714655
citrate	C6H8O7	192.027	2.25	Carbohydrates and carbohydrate conjugates	0.902509	0.905489	0.840368	0.726009	0.7169	0.211602	0.356577	0.0131736	0.00216164	0.000317644	0.278625	0.457109	0.0361654	0.00720547	0.00230292
glycolate (hydroxyacetate)	C2H4O3	76.016	1.87	Carbohydrates and carbohydrate conjugates	0.730638	0.928722	0.916469	1.00277	0.969266	0.0849533	0.45203	0.45825	0.947421	0.727034	0.130113	0.548087	0.577276	0.977766	0.786716
glycerate	C3H6O4	106.026	1.76	Carbohydrates and carbohydrate conjugates	0.650327	0.551818	0.548496	0.635009	0.735678	0.00230102	3.90073e-05	0.000500774	0.000535782	0.00841212	0.00690307	0.000315309	0.00285736	0.00254716	0.0213993
isocitrate	C6H8O7	192.027	2.02	Carbohydrates and carbohydrate conjugates	1.07383	0.981993	0.739505	0.792229	0.685657	0.472712	0.815834	0.00125155	0.0116813	0.000356066	0.568426	0.850924	0.00578095	0.0287082	0.0023468
raffinose	C18H32O16	504.165	1.86	Carbohydrates and carbohydrate conjugates	0.921472	0.780837	1.10428	1.06005	1.02689	0.0710947	0.002265	0.144289	0.274642	0.696434	0.113052	0.00599195	0.257596	0.379268	0.767931
citraconate	C5H6O4	130.026	1.87	Carbohydrates and carbohydrate conjugates	1.02826	0.820979	0.967251	1.03274	0.854761	0.642583	0.00703672	0.515041	0.709135	0.105924	0.721976	0.015168	0.629735	0.79709	0.175531
gluconic acid	C6H12O7	196.058	1.9	Carbohydrates and carbohydrate conjugates	1.12693	0.199736	0.263007	0.251327	0.269528	0.238076	7.70204e-06	0.000107546	0.000162411	0.000102639	0.306549	0.000140081	0.000977993	0.00114876	0.00114482
1-O-Sinapoyl-β-D-glucose #1	C17H22O10	386.121	5.07	Carbohydrates and carbohydrate conjugates	0.469799	0.464964	0.475437	0.377428	0.478892	0.000232332	3.64125e-05	0.00377143	0.000198386	0.000410261	0.00125201	0.000311649	0.0144406	0.00130754	0.00242807
1-O-Sinapoyl-β-D-glucose #2	C17H22O10	386.121	5.3	Carbohydrates and carbohydrate conjugates	0.413373	0.412444	0.581807	0.557679	0.670552	0.000252118	0.00192663	0.00198401	0.0561827	0.0229791	0.00126494	0.00539086	0.00824782	0.10862	0.0486419
verbascose	C30H52O26	828.268	2.5	Carbohydrates and carbohydrate conjugates	1.24504	0.770569	1.10453	0.980883	1.51651	0.177087	0.0401018	0.498888	0.945646	0.0014696	0.237476	0.0655597	0.612559	0.979419	0.00608833
1-O-Feruloyl-β-D-glucose	C16H20O9	356.111	5.34	Carbohydrates and carbohydrate conjugates	0.659073	0.737436	1.03552	1.2381	1.08068	0.00113712	0.000839412	0.451709	0.00210568	0.0653349	0.0039393	0.00280769	0.574005	0.00718408	0.121456
1-O-Sinapoyl-β-D-glucose #3	C17H22O10	386.121	5.41	Carbohydrates and carbohydrate conjugates	0.732575	0.638075	0.944217	0.848145	0.87742	0.00274707	0.00044919	0.338474	0.00567706	0.0834879	0.00799398	0.00179061	0.487603	0.0158303	0.147631
5'-deoxy-5'-(methylthio)adenosine	C11H15N5O3S	297.09	4.79	Carbohydrates and carbohydrate conjugates	2.2534	2.80862	0.649366	0.84853	0.795421	0.175036	0.000100009	0.117295	0.260021	0.231123	0.236909	0.000606303	0.224558	0.366049	0.341968
dimethyl malonate	C5H8O4	132.042	4.41	Carbohydrates and carbohydrate conjugates	0.809192	1.12783	0.955666	0.969852	0.849611	0.0988689	0.876393	0.822809	0.757604	0.228921	0.144577	0.904363	0.893423	0.829076	0.340446
adipic acid	C6H10O4	146.058	4.08	Carbohydrates and carbohydrate conjugates	0.814257	1.16928	1.02956	0.783342	0.814279	0.0949233	0.443879	0.758022	0.268055	0.299202	0.140932	0.542726	0.851678	0.37373	0.411225
α-ketoglutarate	C5H6O5	146.021	2.31	Carbohydrates and carbohydrate conjugates	1.91522	0.475578	0.706434	0.425428	0.470487	4.91878e-05	0.00222801	0.00424874	5.92196e-05	1.1657e-05	0.000596403	0.00594817	0.0154548	0.000613346	0.000281712
glucose	C6H12O6	180.063	1.87	Carbohydrates and carbohydrate conjugates	1.71814	1.16932	1.13879	1.2017	1.20037	0.000666814	0.0124657	0.00578237	0.0202474	0.0279069	0.00258724	0.024846	0.0200318	0.0448226	0.0569929
sucrose	C12H22O11	342.116	1.83	Carbohydrates and carbohydrate conjugates	1.88417	0.9825	1.06713	1.00327	0.963928	0.000250809	0.72974	0.441513	0.925323	0.511853	0.00128045	0.789421	0.565992	0.965265	0.615923
fructose	C6H12O6	180.064	1.55	Carbohydrates and carbohydrate conjugates	1.32147	0.862987	0.666855	0.89626	1.21209	0.0055007	0.0276361	0.370737	0.0972621	0.119219	0.0141655	0.0487401	0.501789	0.168898	0.196441
arabinose	C5H10O5	150.052	1.87	Carbohydrates and carbohydrate conjugates	1.57167	0.843758	0.778942	0.768174	0.709519	0.00204379	0.0035721	0.00159647	0.00280903	0.0020583	0.0064646	0.00866234	0.00693392	0.00895185	0.00736921
glucosamine	C6H13NO5	179.08	1.68	Carbohydrates and carbohydrate conjugates	1.40793	0.839006	0.770611	1.3815	1.7589	0.0109693	0.224139	0.446989	0.427977	0.456509	0.0243669	0.30337	0.570499	0.544357	0.570636
trehalose	C12H22O11	342.116	1.95	Carbohydrates and carbohydrate conjugates	6.27551	0.992746	0.496131	0.724445	0.744049	0.000786858	0.982016	0.229254	0.0679852	0.122773	0.00293558	0.992246	0.36061	0.122458	0.200024
stachyose	C24H42O21	666.227	1.67	Carbohydrates and carbohydrate conjugates	5.48426	0.963023	0.74115	1.22388	1.33988	0.0360028	0.651222	0.402073	0.253481	0.0732365	0.0638829	0.734518	0.529426	0.358583	0.131917
maltotriose	C18H32O16	504.169	2.29	Carbohydrates and carbohydrate conjugates	19.7646	0.222059	1.19224	2.33654	1.51798	1.31099e-06	0.049699	0.267813	0.450479	0.0116512	6.35831e-05	0.0769278	0.410176	0.567996	0.0272488
maltohexaose	C36H62O31	990.324	1.81	Carbohydrates and carbohydrate conjugates	22.9233	1.04047	0.606248	0.844334	0.762499	0.0012334	0.557913	0.341259	0.275438	0.0468061	0.00417349	0.662664	0.484421	0.378564	0.0893011
maltotetraose	C24H42O21	666.22	2.49	Carbohydrates and carbohydrate conjugates	5.5197	0.65783	0.676892	0.967849	1.28503	0.0024314	0.123089	0.345828	0.76977	0.48377	0.00721976	0.176447	0.488524	0.839223	0.589468
methyl-alpha-glucopyranoside	C7H14O6	194.079	1.88	Carbohydrates and carbohydrate conjugates	1.36715	1.13308	0.936503	1.11006	1.07732	0.00619429	0.0133207	0.0599557	0.0498126	0.384671	0.0158117	0.0263695	0.129238	0.0982697	0.498011
citramalic acid	C5H8O5	148.037	3.88	Carbohydrates and carbohydrate conjugates	4.0648	1.56225	0.82939	0.521952	0.494769	1.65425e-07	0.000347496	0.00397905	0.000396818	7.63553e-06	4.81386e-05	0.0016051	0.014657	0.00198409	0.000276788
rhamnose	C6H12O5	164.067	2.49	Carbohydrates and carbohydrate conjugates	1.15195	0.983607	1.29004	1.35676	1.35458	0.00800453	0.862208	0.125312	0.0727747	0.00750396	0.0187848	0.892892	0.232266	0.128687	0.0199647
glyceraldehyde	C3H6O3	90.032	1.82	Carbohydrates and carbohydrate conjugates	5.29049	0.881271	0.913901	1.41764	2.2204	0.000444965	0.703773	0.580403	0.0669017	0.00165762	0.00182373	0.769917	0.683795	0.122022	0.00649608
1-kestose	C18H32O16	504.169	2.48	Carbohydrates and carbohydrate conjugates	4.79839	0.869047	1.05489	0.971508	0.940479	5.62159e-05	0.0370971	0.367897	0.638885	0.335135	0.000629186	0.0613367	0.504991	0.738154	0.44995
glucosaminic acid	C6H13NO6	195.07	1.53	Carbohydrates and carbohydrate conjugates	1.44322	0.685884	1.02017	1.0221	0.912496	0.028886	0.0057526	0.948317	0.710747	0.32145	0.0538834	0.0126819	0.975125	0.795817	0.437655
glucose 6-phosphate	C6H13O9P	260.03	1.62	Carbohydrates and carbohydrate conjugates	2.3274	1.67041	1.62119	1.34322	1.56955	0.00292656	0.00746853	0.990399	0.0170147	0.0984822	0.00843196	0.0158638	0.990399	0.0391609	0.167999
fructose 6-phosphate	C6H13O9P	260.03	1.8	Carbohydrates and carbohydrate conjugates	2.41244	1.96727	1.05695	1.34514	1.19338	0.0160664	0.000197799	0.750174	0.0628613	0.347437	0.0324674	0.00106592	0.846126	0.118375	0.464317
ferulate	C10H10O4	194.057	6.42	Cinnamic acids and derivatives	0.696442	0.716931	0.732361	1.07514	0.886494	0.0825519	0.0123716	0.415838	0.79781	0.743145	0.127104	0.0248286	0.535438	0.860093	0.798193
sinapic acid #1	C11H12O5	224.069	5.43	Cinnamic acids and derivatives	0.574535	0.593091	0.691346	1.03897	0.591278	0.00659611	0.00445449	0.121069	0.571578	0.0691441	0.0164057	0.01037	0.227298	0.673812	0.125324
cis-3,4,5-trimethoxycinnamic acid	C12H14O5	238.084	6.8	Cinnamic acids and derivatives	1.1116	1.08814	0.998858	0.694153	0.895801	0.335848	0.0989148	0.989288	0.00292983	0.0923358	0.417657	0.144644	0.992699	0.00913602	0.159389
p-coumaroyl tartaric acid	C13H12O8	296.053	5.44	Cinnamic acids and derivatives	0.545332	0.610438	0.411531	0.5026	0.348514	9.84398e-05	0.000386397	5.69155e-05	0.000147282	0.00023858	0.000842529	0.00167823	0.000752837	0.00106779	0.0019768
caffeoyltartaric acid	C13H12O9	312.048	5.01	Cinnamic acids and derivatives	0.743146	0.755838	0.582298	0.715795	0.56808	0.00343077	0.00202623	5.67875e-05	0.000564804	0.00440195	0.00959956	0.00561554	0.000786913	0.00259989	0.0135805
salicylic acid 2-O-β-D-glucopyranoside	C13H16O8	300.084	5.13	Cinnamic acids and derivatives	2.05195	1.15079	0.939479	0.924615	0.719026	3.39673e-05	0.00484978	0.12585	0.0611117	0.000438407	0.000520236	0.0111125	0.230329	0.115833	0.00254276
salicylic acid 2-C-β-D-glucopyranoside	C13H16O8	300.083	4.96	Cinnamic acids and derivatives	1.07308	1.23817	3.49833	2.87663	3.41392	0.677853	0.381524	0.0105544	0.00268709	0.000699757	0.74436	0.480621	0.0316633	0.0086584	0.00332671
coumaric acid hexoside	C15H18O8	326.1	5.24	Cinnamic acids and derivatives	1.00221	0.837927	0.922669	1.01171	0.939841	0.95191	0.0423344	0.030105	0.726013	0.178671	0.958498	0.0676885	0.0724013	0.800547	0.280078
caffeic acid-O-hexoside #2	C15H18O9	342.095	5.14	Cinnamic acids and derivatives	0.867093	0.872295	1.0081	1.37921	1.18387	0.0180167	0.0332249	0.841169	0.00200087	0.0301373	0.0354246	0.0555658	0.906593	0.00707624	0.0606931
caffeic acid-O-hexoside #1	C15H18O9	342.096	4.76	Cinnamic acids and derivatives	1.03348	1.0007	1.7759	2.39674	2.03019	0.53802	0.999073	0.224602	0.125044	0.192089	0.626255	0.999073	0.355213	0.207216	0.29474
p-Coumaroyl quinic acid	C16H18O8	338.103	5.28	Cinnamic acids and derivatives	1.03836	1.07305	0.57886	0.837803	0.731958	0.746314	0.658052	0.0213444	0.136806	0.093966	0.807351	0.739356	0.0549666	0.222887	0.161243
3-O-feruloylquinic acid	C17H20O9	368.109	5.46	Cinnamic acids and derivatives	0.660677	0.676278	0.559631	0.757872	0.988089	0.00789561	0.10314	0.066915	0.181985	0.930651	0.0186799	0.150069	0.140088	0.273449	0.95367
p-coumaric acid	C9H8O3	164.047	5.44	Cinnamic acids and derivatives	0.461658	0.560567	0.376717	0.471462	0.331769	0.000840166	0.000383425	1.21158e-05	0.000240453	0.000688957	0.00301837	0.00169055	0.000391744	0.0015159	0.00332996
o-coumaric acid	C9H8O3	164.047	5.24	Cinnamic acids and derivatives	0.946576	0.85578	0.935967	1.04895	0.933111	0.522938	0.0461293	0.322979	0.40007	0.332791	0.616094	0.0721701	0.474681	0.513364	0.450979
caffeic acid	C9H8O4	180.042	6.32	Cinnamic acids and derivatives	1.5562	0.860764	0.621538	0.643198	0.513558	0.0177965	0.577552	0.0097186	0.0717574	0.00439186	0.0352298	0.67497	0.0300863	0.128455	0.013695
trans-2-Hydroxycinnamate	C9H8O3	164.048	3.85	Cinnamic acids and derivatives	2.50635	1.90586	1.17877	1.46288	1.325	0.000573384	0.00233216	0.276509	0.023536	0.187155	0.00228568	0.00611404	0.414763	0.0505588	0.288697
ascorbate (Vitamin C)	C6H8O6	176.032	2.51	Cofactors, Prosthetic Groups, Electron Carriers	1.05177	1.14427	1.19418	1.06483	0.534776	0.501819	0.121692	0.0329785	0.373884	0.232773	0.596038	0.175308	0.0786618	0.488407	0.34266
nicotinamide	C6H6N2O	122.048	2.59	Cofactors, Prosthetic Groups, Electron Carriers	1.27482	1.34285	1.34874	1.04188	1.05317	0.114928	0.0989108	0.101685	0.63428	0.646812	0.163142	0.145369	0.199935	0.735764	0.729866
pyridoxal	C8H9NO3	167.059	4.21	Cofactors, Prosthetic Groups, Electron Carriers	1.45589	1.30885	1.88126	1.78994	1.08343	0.131544	0.225437	0.00901447	0.000953602	0.719313	0.184924	0.303713	0.0285132	0.00406683	0.784214
nicotinate	C6H5NO2	123.032	2.48	Cofactors, Prosthetic Groups, Electron Carriers	4.3978	1.58702	1.1244	1.40621	1.99227	0.000133169	0.0177235	0.233817	0.0215175	0.00724378	0.000880732	0.0334905	0.365811	0.0469178	0.0194509
riboflavin (vitamin B2)	C17H20N4O6	376.137	5.05	Cofactors, Prosthetic Groups, Electron Carriers	2.15677	3.52778	4.00938	3.25555	2.97052	0.00144145	0.000160595	5.12458e-05	2.98044e-05	8.66005e-05	0.00482141	0.000898715	0.00078487	0.000432164	0.00104642
pyridoxine (vitamin B6)	C8H11NO3	169.073	2.49	Cofactors, Prosthetic Groups, Electron Carriers	1.07995	1.23892	0.74734	1.09519	0.875446	0.585485	0.0202003	0.285782	0.618109	0.528486	0.673423	0.0369704	0.426475	0.719885	0.630704
pantothenate	C9H17NO5	219.11	4.57	Cofactors, Prosthetic Groups, Electron Carriers	0.621158	1.08488	1.2624	1.72533	1.39458	0.000396598	0.0311521	0.00305412	0.000299103	0.000895412	0.0016972	0.0530132	0.0121747	0.0016366	0.00399492
trigonelline (N'-methylnicotinate)	C7H7NO2	137.048	1.76	Cofactors, Prosthetic Groups, Electron Carriers	1.58263	0.310745	0.402221	0.4882	1.59125	6.26446e-05	1.00543e-05	0.00118035	2.81187e-05	0.353768	0.000651056	0.000146291	0.00554001	0.00042918	0.466331
threonate	C4H8O5	136.037	1.72	Cofactors, Prosthetic Groups, Electron Carriers	0.513786	0.185735	0.187072	0.289011	0.251086	0.11381	4.35245e-06	0.0962187	0.000131366	0.000573272	0.162347	0.000126656	0.193101	0.00100253	0.00307868
pheophorbide A	C35H36N4O5	592.268	19.33	Cofactors, Prosthetic Groups, Electron Carriers	0.959958	0.878293	0.540009	0.90121	0.465734	0.807432	0.498324	0.0377326	0.821134	0.282145	0.848241	0.601711	0.0871444	0.878705	0.393375
pyridoxamine (vitamin B6)	C8H12N2O2	168.091	5.01	Cofactors, Prosthetic Groups, Electron Carriers	4.86201	2.46637	1.43426	1.27787	1.09821	0.0272225	0.0177098	0.406888	0.233445	0.612232	0.051108	0.0336834	0.533353	0.340196	0.704553
ellagic acid xyloside	C19H14O12	434.048	5.65	Ellagic acd and conjugates	1.06245	0.931201	0.570805	2.97647	1.1665	0.662967	0.994429	0.0544626	0.0245353	0.584968	0.733549	1.00131	0.120065	0.052318	0.678563
ellagic acid hexoside	C20H16O13	464.059	5.31	Ellagic acd and conjugates	1.24173	0.932671	0.8338	1.82128	1.01975	0.373901	0.588192	0.575267	0.162161	0.98376	0.459094	0.684655	0.683276	0.248818	0.990592
hydroxy-hexanoate-glucoside	C12H22O8	294.131	5.18	Fatty Acyls	0.802344	0.598009	0.724001	0.74309	0.720621	0.000509874	3.1627e-05	0.000733895	0.00189277	0.00160274	0.00206074	0.000287608	0.00395488	0.00686129	0.0065464
oleamide	C18H35NO	281.272	18.43	Fatty Acyls	0.601557	1.39716	1.13755	2.4854	0.469009	0.0675325	0.047582	0.558072	0.0644442	0.0806307	0.107978	0.0740447	0.665569	0.119037	0.143453
itaconic acid	C5H6O4	130.026	2.49	Fatty Acyls	1.59085	1.04038	0.625061	1.04902	0.807608	0.181167	0.878378	0.0280288	0.988411	0.481388	0.241833	0.903208	0.068541	0.991831	0.591536
methylsuccinic acid	C5H8O4	132.042	4.78	Fatty Acyls	3.64335	0.795272	0.894817	0.943286	1.02885	4.1423e-05	0.00307234	0.151107	0.386267	0.718426	0.000574005	0.00777435	0.261739	0.502321	0.786202
naringenin	C15H12O5	272.068	8.57	Flavonoids	1.58333	6.2897	1.96998	0.957031	0.367928	0.212073	0.00315943	0.0024923	0.695761	0.028039	0.277987	0.00785807	0.0100731	0.791257	0.0568622
quercetin-3-O-rhamnoside #1	C21H20O11	448.1	6.34	Flavonoids	1.45358	1.7265	0.957421	1.07095	0.641034	0.00976393	0.00011489	0.368363	0.0630842	7.71635e-05	0.0221977	0.000682304	0.503256	0.118028	0.000972932
isoorientin	C21H20O11	448.101	5.45	Flavonoids	2.68225	6.66537	1.74751	1.68064	1.43385	0.00652666	0.000561975	0.000420515	0.0175344	0.509091	0.0163729	0.00212383	0.00249734	0.0400392	0.615151
cyanidin-3-O-glucoside #3	C21H21O11	449.109	6.36	Flavonoids	1.49147	1.40665	0.869749	1.04929	0.627958	0.00749467	0.077153	0.415404	0.734847	0.10524	0.0178766	0.114549	0.537256	0.807218	0.176414
chalcone 2'-O-glucoside	C21H22O10	434.121	6.53	Flavonoids	1.47546	2.28338	0.914007	1.22452	0.317355	0.0003678	8.50037e-05	0.0868072	0.00149528	9.19574e-06	0.00159746	0.000549691	0.179155	0.00563158	0.000242433
chrysoeriol C-glucoside #2	C22H22O11	462.116	5.48	Flavonoids	3.01962	43.4454	8.39429	4.49399	3.29848	0.00368995	4.79065e-07	1.29564e-05	6.9322e-05	0.00032244	0.0102264	0.000139408	0.000377032	0.000670112	0.00228067
isorhamnetin-O-rhamnoside	C22H22O11	462.116	6.7	Flavonoids	3.35003	5.4834	1.92259	1.91121	0.880793	0.0102468	0.00338007	0.000185906	0.00480223	0.291924	0.0231148	0.00826556	0.00146212	0.0139265	0.403134
petunidin 3-glucoside	C22H23O12	479.119	6.32	Flavonoids	4.15808	12.1011	4.55451	4.93546	3.12451	0.000798964	5.69939e-06	0.000789514	0.000264385	0.00829661	0.00294302	0.000127579	0.00403068	0.00156473	0.0214823
syringetin 3-O-β-D-glucopyranoside	C23H24O13	508.121	6.26	Flavonoids	1.36928	14.2233	9.57594	8.33808	4.57883	0.0243376	8.78834e-05	5.36324e-08	1.27159e-06	7.15735e-06	0.0465936	0.000555958	1.5607e-05	9.21906e-05	0.000345938
apigenin 6-C-α-L-arabinosyl-8-C-β-L-arabinoside	C25H26O13	534.138	5.7	Flavonoids	4.17134	28.2078	19.8156	12.9512	5.20987	0.0394815	0.00511412	3.89642e-07	4.85433e-07	4.01132e-06	0.0692116	0.0114478	5.66929e-05	7.03877e-05	0.000387761
naringenin chalcone-C-pentoside-O-hexoside	C26H30O14	566.166	5.67	Flavonoids	1.37697	1.03973	1.29045	1.3753	1.0908	0.0148448	0.602221	0.0205577	0.012268	0.0686249	0.0304214	0.692673	0.0534134	0.0294027	0.126759
tricin 7-O-neohesperidoside	C29H34O16	638.171	6.18	Flavonoids	55.3248	320.668	23.5534	9.45677	3.44898	0.000698771	8.88736e-07	7.17957e-05	0.000129189	0.00444673	0.00267556	8.62074e-05	0.000746163	0.00101256	0.0134328
peonidin 3-O-(6-O-coumaryl)-glucoside	C31H29O13	609.162	6.19	Flavonoids	6.21445	66.8938	9.15804	4.18333	2.20907	0.00165448	5.04215e-06	0.000367615	0.00111473	0.0256416	0.0054096	0.000122272	0.00237725	0.00455312	0.0534969
isoscoparin	C32H30O14	638.163	6.16	Flavonoids	4.24627	156.251	23.9933	10.292	4.15661	0.0329567	6.59886e-05	6.13151e-07	6.69389e-08	5.38267e-06	0.0595678	0.000480067	5.94757e-05	1.94123e-05	0.000390243
malvidin 3-O-(6-O-coumaryl)-glucoside	C32H31O14	639.172	6.18	Flavonoids	26.0967	267.603	23.3553	9.46563	3.44398	0.000282907	1.25118e-06	7.54736e-05	0.000122472	0.00441017	0.0013721	7.28186e-05	0.000732094	0.000986576	0.0134626
trcin O-glucoside O-guaiacylglyceryl ether	C33H36O16	688.199	6.16	Flavonoids	20.3366	0.962988	0.689056	1	1	0.000202839	0.648497	0.724949	#DIV/0!	#DIV/0!	0.00120462	0.734291	0.824063	#DIV/0!	#DIV/0!
isoscoparin 2''-O-(6'''-(E)-feruloyl)-glucopyranoside	C38H40O19	800.214	5.6	Flavonoids	2.70064	51.4906	16.5486	5.12889	1.74521	0.0291409	9.16846e-06	7.67603e-05	4.79902e-05	0.0165738	0.0540128	0.000140422	0.000720556	0.000579881	0.0361383
isovitexin	C21H20O10	432.11	5.62	Flavonoids	0.724296	1.80761	0.814334	0.749408	0.446597	0.300231	0.110798	0.339789	0.34174	0.0421087	0.376583	0.160409	0.484699	0.454608	0.0819566
eriodictyol	C15H12O6	288.062	7.16	Flavonoids	0.419778	2.05666	0.87961	2.74397	0.768562	0.00878617	0.010069	0.555488	0.0439502	0.27087	0.0202919	0.020929	0.665214	0.0885109	0.383182
Epicatechin	C15H14O6	290.079	5.61	Flavonoids	0.528583	1.81592	0.698888	0.58363	0.287253	0.00326837	0.00320415	0.0110874	0.000106389	0.00103965	0.00932447	0.00790176	0.0325901	0.000907432	0.00436953
dihydroquercetin	C15H12O7	304.058	6.59	Flavonoids	0.976216	1.1391	0.679231	1.14486	0.643051	0.967473	0.0559572	0.111578	0.404724	0.0231499	0.967473	0.0852541	0.215027	0.517048	0.0486483
morin	C15H10O7	302.042	6.35	Flavonoids	0.885507	0.940939	0.902816	1.2586	0.823794	0.299578	0.615639	0.534359	0.176793	0.221903	0.377391	0.702552	0.645222	0.267031	0.333429
quercetin	C15H10O7	302.042	7.7	Flavonoids	0.650897	1.61012	2.27185	1.14991	1.22518	0.0303789	0.145232	0.0141731	0.501026	0.25736	0.0552515	0.202213	0.0381887	0.610494	0.365855
naringenin chalcone	C15H12O5	272.069	8.23	Flavonoids	0.908254	1.65607	1.46339	2.01429	1.38332	0.951453	0.0184675	0.0123089	0.00112727	0.100911	0.961364	0.034449	0.0347756	0.0045404	0.170141
Catechin	C15H14O6	290.079	5.37	Flavonoids	0.488845	0.465834	0.197131	0.313602	0.183244	0.000744122	0.00040398	1.51888e-05	9.4007e-07	0.000276084	0.0028122	0.0016794	0.000401813	9.08734e-05	0.0021639
Luteoforol	C15H14O6	290.08	5.62	Flavonoids	0.467118	1.53578	0.557842	0.525712	0.243877	0.00668341	0.00501313	0.0128711	0.00196943	0.00266224	0.016482	0.011397	0.0356713	0.00705105	0.00919108
epigallocatechin	C15H14O7	306.074	4.74	Flavonoids	0.464678	0.616776	0.275235	0.434272	0.274274	0.0137153	0.0674321	0.00189116	0.000115635	0.00344147	0.0289214	0.101148	0.00797577	0.00095812	0.0110892
rhamnetin	C16H12O7	316.063	5.79	Flavonoids	1.32494	1.58968	1.29127	1.08409	1.42974	0.874276	0.00152953	0.125479	0.456656	0.00991839	0.898991	0.0044959	0.231104	0.573291	0.0235765
isorhamnetin	C16H12O7	316.058	8.58	Flavonoids	1.31136	8.50968	6.20719	2.44372	3.37072	0.373901	0.00309708	0.0102704	0.0801046	0.0138035	0.461039	0.0077694	0.0311321	0.14079	0.031031
myricetin-3-O-glucuronide #1	C21H18O14	494.07	5.68	Flavonoids	0.946563	1.09772	1.94471	3.12221	4.41916	0.168989	0.326618	0.000411846	5.13987e-05	0.00011244	0.229793	0.426214	0.00254994	0.000573293	0.00120768
kaempferol-3-O-rhamnoside	C21H20O10	432.105	6.23	Flavonoids	0.781097	1.16455	0.940727	1.22171	0.719477	0.0618628	0.295016	0.760211	0.0163491	0.167657	0.10057	0.392007	0.844357	0.03793	0.264242
naringenin chalcone hexoside	C21H20O10	432.105	6.35	Flavonoids	0.480554	0.489614	0.375183	0.759807	0.609861	0.10419	0.044013	0.00462266	0.458116	0.481606	0.151596	0.0696075	0.0162072	0.572645	0.589307
kaempferol-7-O-rhamnoside	C21H20O10	432.105	6.58	Flavonoids	0.630544	1.10068	1.07194	1.21318	0.926764	0.0469948	0.765199	0.527227	0.242338	0.541259	0.0804441	0.812675	0.641937	0.349641	0.640674
luteolin 7-O-glucoside	C21H20O11	448.101	6	Flavonoids	0.61706	0.603014	0.585745	0.635541	0.4611	0.000117111	0.000628568	0.000705289	0.00709634	0.00014806	0.000851984	0.00225819	0.00387244	0.019055	0.00134179
kaempferol-3-O-glucoside	C21H20O11	448.1	6.27	Flavonoids	0.948179	1.37288	7.92175	7.24589	10.0377	0.60903	0.404818	0.000802119	0.000285962	0.000178721	0.692296	0.503428	0.00402443	0.00162606	0.00157058
quercetin-3-O-rhamnoside #2	C21H20O11	448.099	6.49	Flavonoids	0.631251	0.772588	1.06469	0.905948	0.992667	0.0385821	0.250215	0.674918	0.562682	0.845369	0.0680447	0.335542	0.776289	0.666032	0.881859
quercetin 3-D-galactoside	C21H20O12	464.095	6.01	Flavonoids	1.07256	2.52181	3.25995	3.38232	3.24205	0.214335	9.92374e-07	2.67647e-05	1.16168e-05	2.36157e-05	0.278444	7.21952e-05	0.000599118	0.000306262	0.000489182
myricetin-3-O-hexoside #2	C21H20O13	480.091	6.53	Flavonoids	0.415308	0.662161	1.09658	2.36283	3.61925	1.03584e-06	0.00109367	0.121845	0.000243076	7.36409e-05	6.0286e-05	0.0033152	0.227288	0.00149983	0.000970721
myricetin-3-O-hexoside #1	C21H20O13	480.09	5.69	Flavonoids	0.561541	2.37483	3.46344	5.41718	4.15696	9.31322e-05	0.000380717	4.58512e-05	3.71058e-06	0.000400865	0.000846921	0.00170444	0.000784865	0.000134508	0.00247342
cyanidin-3-O-glucoside #2	C21H21O11	449.108	6.29	Flavonoids	1.01884	1.206	4.93888	6.55463	10.9013	0.873528	0.351625	0.000414936	0.000186623	0.000310241	0.901406	0.452755	0.00251555	0.00125862	0.00230692
cyanidin-3-O-glucoside #1	C21H21O11	449.108	6.03	Flavonoids	0.554196	0.555705	0.478082	0.656893	0.474083	0.0114273	0.00221195	0.120502	0.22854	0.136233	0.0251921	0.00601567	0.227701	0.336429	0.219486
delphinidin 3-O-glucoside #2	C21H21O12	465.104	6.03	Flavonoids	1.0364	2.38167	2.7534	3.40048	3.27505	0.800337	0.00158049	0.00585585	0.00164273	0.00716892	0.843834	0.0045537	0.0200477	0.0061076	0.0194298
delphinidin 3-O-glucoside #1	C21H21O12	465.103	5.63	Flavonoids	0.705513	1.8734	1.30976	1.49402	2.03796	0.0191397	0.00238281	0.680305	0.0609282	0.333834	0.0373803	0.00613626	0.779404	0.116245	0.450288
astilbin #2	C21H22O11	450.116	5.59	Flavonoids	0.671825	0.818294	0.639188	0.784664	0.553276	0.000255707	0.0120882	7.07217e-05	0.00670725	0.000538135	0.0012612	0.0244282	0.000762223	0.0185248	0.00294451
astilbin #3	C21H22O11	450.116	5.84	Flavonoids	0.894965	0.865908	0.781144	0.907267	0.630192	0.104783	0.0411621	0.00167148	0.168602	0.0140264	0.151701	0.0669171	0.00715293	0.25734	0.0312896
astilbin #1	C21H22O11	450.116	5.41	Flavonoids	0.946836	2.09252	1.1678	1.42383	1.06895	0.258052	0.000367827	0.0984857	0.00322997	0.772258	0.330806	0.00167246	0.196297	0.0099648	0.820347
dihydroquercetin-O-hexoside #1	C21H22O12	466.111	5.06	Flavonoids	0.758588	0.998649	0.83484	1.00646	0.685564	0.00404657	0.968379	0.0120233	0.89001	0.0016645	0.0109033	0.985308	0.0346413	0.935156	0.00643606
dihydroquercetin-O-hexoside #2	C21H22O12	466.111	5.19	Flavonoids	0.659668	1.32545	0.996435	1.15393	1.04228	0.000940295	0.00786775	0.953562	0.0252112	0.717452	0.0033369	0.0165907	0.970233	0.0533669	0.78811
epicatechin gallate	C22H18O10	442.09	6.2	Flavonoids	0.570601	0.384471	0.396513	0.832974	0.950004	0.00191445	0.00060357	0.000278149	0.0415127	0.559097	0.00619007	0.00225178	0.00197418	0.0841866	0.65643
swertisin	C22H22O10	446.125	6.03	Flavonoids	0.473244	0.55088	0.454503	0.626938	0.576367	0.00010265	3.73591e-05	0.0001989	5.4409e-05	0.000625865	0.000853459	0.000310614	0.00152316	0.000584393	0.00318422
swertisin	C22H22O10	446.124	6.16	Flavonoids	0.737359	0.693305	0.617447	0.750804	0.891479	0.0115048	0.0700724	0.0106627	0.108999	0.273939	0.0251721	0.10457	0.0316618	0.18594	0.383779
chrysoeriol-O-hexoside	C22H22O11	462.116	6.41	Flavonoids	0.854325	1.60663	1.28353	0.993543	0.769466	0.130246	0.0167076	0.0234674	0.976444	0.0429664	0.183988	0.0324127	0.0583676	0.983224	0.0830683
chrysoeriol C-glucoside #1	C22H22O11	462.116	5.77	Flavonoids	2.00837	11.7137	1.95699	1.64377	1.06087	0.0886541	0.000150141	0.00615644	0.135087	0.890276	0.13367	0.000856686	0.0203582	0.221329	0.922071
isoorientin 7,3'-dimethyl ether	C23H24O11	476.135	5.98	Flavonoids	0.362586	0.556645	0.312949	0.421014	0.513682	0.0201772	0.0276506	0.00157852	4.34337e-05	0.0083196	0.0391439	0.0484719	0.00706693	0.000572536	0.0213512
C-hexosyl-methylchrysoeriol	C23H24O11	476.135	6.11	Flavonoids	0.909126	0.82962	0.840288	0.844629	0.829081	0.775785	0.0331262	0.527447	0.236139	0.36915	0.829976	0.0557209	0.63953	0.342401	0.482223
tricin 7-O-β-D-glucopyranoside	C23H24O12	492.126	6.38	Flavonoids	0.684189	3.0703	2.67415	2.02816	1.41582	0.0491029	0.000201967	5.97569e-05	0.000447412	0.0323163	0.0835611	0.00106859	0.000724552	0.00219914	0.0646326
luteolin-di-pentoside	C25H26O14	550.13	6.2	Flavonoids	0.803366	0.728887	0.395738	0.864691	0.516223	0.134136	0.054976	0.00619135	0.158076	0.00902816	0.186763	0.0842001	0.0202436	0.24384	0.0223775
kaempferol-3-O-rhamnoside-7-O-rhamnoside	C27H30O14	578.162	5.97	Flavonoids	0.865044	1.86928	1.16067	1.73747	0.993144	0.937371	0.0425329	0.544719	0.151678	0.946319	0.950436	0.0676343	0.655013	0.237765	0.956211
rutin	C27H30O16	610.15	5.77	Flavonoids	1.0616	1.0707	1.44183	1.41813	2.16653	0.0733037	0.0413094	0.000334882	0.0053201	0.000495753	0.114685	0.0667835	0.00221478	0.0151258	0.00276478
quercetin-3-O-rutinoside #2	C27H30O16	610.166	6.68	Flavonoids	0.758317	31.8393	14.2141	3.31628	2.36043	0.551011	0.000877829	0.000206371	0.00137726	0.00843988	0.638822	0.00290282	0.00153984	0.00532542	0.0212832
delphinidin-3-O-(6''-O-alpha-rhamnopyranosyl-beta-glucopyranoside)	C27H31O16	611.158	5.8	Flavonoids	0.96333	0.928538	0.977521	0.947732	1.23705	0.605193	0.428785	0.952468	0.676214	0.524597	0.690632	0.528714	0.97252	0.775107	0.628649
delphinidin 3,5-diglucoside	C27H31O17	627.152	4.91	Flavonoids	0.757567	1.071	1.65714	2.24689	1.72468	0.0250451	0.666455	0.00997178	0.00111032	0.0579225	0.0473254	0.745917	0.0305451	0.00459989	0.109075
procyanidin dimer B4	C30H26O12	578.142	5.71	Flavonoids	0.477493	0.513551	0.295798	0.379852	0.199505	1.75213e-05	0.000169396	3.21155e-06	1.71899e-06	1.50099e-05	0.000424891	0.00093008	0.000186912	8.30844e-05	0.000334836
procyanidin dimer B2	C30H26O12	578.142	5.21	Flavonoids	0.421194	0.735277	0.373237	0.493535	0.278571	0.000206344	0.980725	2.75402e-05	1.98383e-05	5.32363e-05	0.00120092	0.994393	0.000572442	0.00038354	0.000812554
procyanidin dimer B5	C30H26O12	578.142	5.97	Flavonoids	0.481974	0.576956	0.559722	0.675111	0.387415	2.28897e-05	2.46043e-05	0.000305951	0.00181722	0.00101867	0.000475779	0.000255709	0.0020705	0.00667079	0.00434434
procyanidin dimer B1	C30H26O12	578.143	4.98	Flavonoids	0.620001	0.727232	0.532433	0.666775	0.398432	0.000135243	0.000687964	0.000463708	0.000395948	5.13932e-05	0.000874572	0.00241202	0.00269878	0.00201447	0.000828002
procyanidin dimer B3	C30H26O12	578.143	5.38	Flavonoids	0.511137	0.608502	0.655582	0.792414	0.4963	2.91433e-05	8.31449e-06	0.000384156	0.00377653	0.000355274	0.000471151	0.000134418	0.0024302	0.0112907	0.00239603
cyanidin 3-O-(6''-caffeoyl-glucoside) #1	C30H27O14	611.14	4.15	Flavonoids	0.921264	0.885046	0.438888	0.751656	0.533425	0.669865	0.444239	0.00791761	0.0669191	0.0873743	0.738374	0.540893	0.0253189	0.121291	0.152642
cyanidin 3-O-(6''-caffeoyl-glucoside) #2	C30H27O14	611.139	4.47	Flavonoids	0.786622	0.752568	0.512624	0.64052	0.706449	0.0773114	0.0297956	0.00346253	0.14781	0.246646	0.120308	0.0513049	0.0134346	0.232962	0.355858
tricin 4'-O-(syringyl alcohol)ether O-hexoside	C32H34O15	658.18	6.46	Flavonoids	1.98542	23.1178	17.0258	9.03112	3.50433	0.138007	0.00125108	0.000767953	3.93343e-05	0.00462422	0.191238	0.00375323	0.00406317	0.000543189	0.0135457
isoorientin-7,2''-di-O-glucoside	C33H40O21	772.207	5.47	Flavonoids	0.774573	14.0729	13.9691	5.62907	2.40215	0.964437	0.0042512	0.00111294	0.000227023	0.0178331	0.967763	0.00997661	0.00530925	0.00146304	0.0380264
procyanidin-O-gallate #2	C37H30O16	730.154	5.71	Flavonoids	0.347981	0.449856	0.29029	0.463587	0.216307	4.37845e-06	0.000226384	6.71023e-06	3.20438e-06	0.00192945	0.00014157	0.00111657	0.000278954	0.000132753	0.0070828
procyanidin-O-gallate #1	C37H30O16	730.155	5.5	Flavonoids	0.620554	0.608962	0.525588	0.638572	0.344511	6.87438e-05	0.00104974	0.000126384	0.000280257	0.00297324	0.000689808	0.00328466	0.00105079	0.00162549	0.00979819
monogalloyl glucose #3	C13H16O10	332.074	4.24	Hydrolyzable Tannins	1.33793	1.14787	0.901341	0.956632	0.263875	0.000332022	1.6442e-05	0.000999414	0.231316	7.82936e-06	0.00146392	0.000191385	0.00484716	0.338796	0.00025228
monogalloyl glucose #2	C13H16O10	332.074	4.05	Hydrolyzable Tannins	0.527597	0.577516	0.49071	0.627164	0.802121	0.000146891	2.93647e-05	6.87477e-05	0.000317061	0.00690055	0.000929243	0.000284837	0.000769445	0.00170273	0.0192419
monogalloyl glucose #4	C13H16O10	332.074	4.45	Hydrolyzable Tannins	0.615714	0.945007	0.951546	1.01146	1.44111	3.42048e-05	0.0285453	0.195363	0.792092	0.000642939	0.000497679	0.0494446	0.319385	0.857114	0.00321469
monogalloyl glucose #1	C13H16O10	332.074	3.96	Hydrolyzable Tannins	0.486991	0.599203	0.660789	0.904805	0.897518	2.65e-05	0.00012685	2.89944e-05	0.0532057	0.105642	0.000453618	0.000738268	0.00056249	0.104254	0.17607
digalloylglucose #1	C20H20O14	484.085	4.73	Hydrolyzable Tannins	0.781928	0.881962	0.31498	0.442759	0.271344	0.33276	0.253839	0.0412307	0.0140674	0.000587129	0.415593	0.338841	0.0930088	0.0331671	0.00309577
digalloylglucose #2	C20H20O14	484.085	4.91	Hydrolyzable Tannins	1.98695	4.39885	3.42918	2.3766	3.63505	0.0413437	0.000796396	0.000840309	0.00414194	0.00326908	0.0720419	0.00269478	0.00414457	0.0122567	0.0106521
galloyl-HHDP-glucose #1	C27H22O18	634.08	4.96	Hydrolyzable Tannins	0.667924	0.616559	0.943685	0.794203	0.369854	0.0974024	0.096774	0.724978	0.540844	0.06476	0.143152	0.14295	0.820889	0.645451	0.121164
galloyl-HHDP-glucose #2	C27H22O18	634.081	5.07	Hydrolyzable Tannins	0.564658	0.478656	0.262503	0.574388	0.492005	0.00212781	0.00235597	0.000115244	0.0108066	0.0691307	0.00658715	0.00612132	0.000986351	0.0272513	0.126088
HHDP-digalloylglucose #1	C34H26O22	786.092	5.41	Hydrolyzable Tannins	1.18825	1.47781	0.850795	1.50211	2.18634	0.785115	0.045135	0.908979	0.117079	0.194233	0.83688	0.0709962	0.951486	0.197401	0.296461
HHDP-digalloylglucose #2	C34H26O22	786.091	5.52	Hydrolyzable Tannins	1.1261	0.88114	0.520201	0.826675	0.827507	0.42737	0.668621	0.0133015	0.261244	0.566952	0.516036	0.745474	0.036175	0.365994	0.660305
ribonolactone	C5H8O5	148.037	3.12	Lactones	1.38266	1.24744	1.01165	0.875362	0.813523	0.0218547	0.00157948	0.9795	0.0932586	0.25056	0.0421173	0.0045963	0.986278	0.162922	0.359715
jasmonic acid	C12H18O3	210.124	3.77	Lineolic acids and derivatives	3.98305	2.76594	0.71479	0.846597	0.835668	0.00225625	0.0022121	0.149624	0.142377	0.242525	0.00683924	0.00596037	0.263882	0.229385	0.351661
10-heptadecenoate (17:1n7)	C17H32O2	268.24	15.74	Lipids	0.952965	0.928707	1.06755	1.02532	1.10625	0.70274	0.417378	0.493137	0.873096	0.545434	0.768787	0.516838	0.608063	0.927465	0.642991
choline	C5H14NO	104.109	1.68	Lipids	1.52262	0.887571	0.947708	0.953887	0.979117	0.0727773	0.12833	0.585243	0.0588527	0.810966	0.115099	0.182166	0.683959	0.113028	0.855201
glycerol	C3H8O3	92.05	1.66	Lipids	1.17918	0.73181	0.715078	1.00002	1.05748	0.0866847	0.000613355	0.379613	0.999984	0.535731	0.131381	0.00225932	0.509066	0.999984	0.636729
acetoacetate	C4H6O3	102.032	1.92	Lipids	2.2564	1.24108	1.28765	1.33109	1.23624	0.00515233	0.0196139	0.0060504	0.0113212	0.353726	0.0135075	0.0363545	0.0202376	0.0280611	0.468405
ethanolamine	C2H7NO	61.053	1.52	Lipids	0.971958	0.568998	0.815861	1.12438	1.31394	0.496785	0.0003951	0.474333	0.0547682	0.00589396	0.592477	0.00169079	0.589875	0.106596	0.0167573
palmitate (16:0)	C16H32O2	256.24	18.78	Lipids	0.684475	1.30362	1.13165	1.40013	0.817344	0.108142	0.220419	0.871362	0.34243	0.404073	0.155788	0.301135	0.928815	0.453446	0.520805
sphinganine	C18H39NO2	301.298	11.78	Lipids	3.02992	0.524258	1.84521	1.22528	3.43124	0.0125696	0.151675	0.0518062	0.49096	0.00276674	0.0268953	0.210178	0.115081	0.600752	0.00943946
arachidate (20:0)	C20H40O2	312.302	17.79	Lipids	0.735955	0.858283	1.0007	0.926624	0.64584	0.110567	0.5314	0.759257	0.876878	0.691651	0.158497	0.636368	0.849783	0.928083	0.765568
phytosphingosine	C18H39NO3	317.293	10.74	Lipids	1.32497	1.57517	1.81581	0.751586	2.0549	0.186766	0.300066	0.0574771	0.305734	0.0151678	0.248169	0.396906	0.125758	0.414312	0.0333233
2-hydroxymyristic acid	C14H28O3	244.203	16	Lipids	0.683114	1.24029	1.03513	1.33965	0.802312	0.0664535	0.430613	0.907077	0.019882	0.233009	0.10684	0.528728	0.952922	0.0443522	0.341276
tetradecylamine	C14H31N	213.246	9.93	Lipids	0.262444	0.478297	0.401897	0.720061	1.02094	0.0621809	0.13947	0.027988	0.213499	0.761664	0.100526	0.197018	0.0690212	0.317511	0.812068
phthalic acid mono-2-ethylhexyl Ester	C16H22O4	278.152	15.86	Lipids	1.02827	0.967268	1.25934	1.00324	1.01287	0.900272	0.814769	0.33799	0.954363	0.989261	0.922462	0.85287	0.48933	0.974526	0.989261
9-OxoOTrE	C18H28O3	292.204	14.31	Lipids	12.2726	0.370565	0.12057	0.516914	1.45121	0.790799	0.000916202	0.00590006	0.10346	0.623176	0.836809	0.00296239	0.0199641	0.177536	0.70871
pinolenic acid	C18H30O2	278.224	17.35	Lipids	0.644542	0.67573	0.975917	0.634134	1.08022	0.058057	0.0245045	0.394317	0.0106776	0.458975	0.095992	0.0440174	0.523956	0.0271623	0.571256
13(S)-HOTrE	C18H30O3	294.218	15.36	Lipids	1.06435	0.70442	0.823742	0.785868	1.10338	0.416461	0.0109363	0.271328	0.0660972	0.286222	0.504958	0.022255	0.413384	0.121318	0.39715
9-HOTrE	C18H30O3	294.219	13.85	Lipids	0.382386	0.245624	0.272409	0.544418	1.53716	4.77517e-05	1.12412e-05	0.0620274	0.144258	0.406947	0.000631625	0.00014869	0.13272	0.231131	0.522188
9-HODE	C18H32O3	296.235	14.91	Lipids	0.767021	0.634067	0.94674	0.963613	1.15589	0.133772	0.000955125	0.353815	0.315449	0.22507	0.187152	0.0030543	0.495001	0.421568	0.336445
2-palmitoylglycerol	C19H38O4	330.274	13.42	Lipids	0.286396	0.331005	0.414319	0.620395	0.567723	0.00950782	0.00418721	0.0598136	0.121729	0.00960446	0.0217856	0.00990633	0.129894	0.202881	0.0232108
N-oleoyl-serine	C21H39NO4	369.289	16.5	Lipids	0.868998	0.521682	1.10671	0.989781	1.05229	0.279293	0.000216465	0.709892	0.969773	0.894877	0.353366	0.00108606	0.810112	0.983337	0.923539
1-LysoPE(16:0)	C21H44NO7P	453.286	14.09	Lipids	0.324715	0.909971	1.29872	1.25639	1.15633	0.000297703	0.362283	0.155297	0.14636	0.34813	0.00142019	0.462387	0.265833	0.233211	0.463108
2-LysoPE(18:3)	C23H42NO7P	475.27	11.7	Lipids	0.153733	0.803239	1.59219	2.36086	2.38787	0.000818398	0.373901	0.0127217	0.0348324	9.00215e-05	0.00297692	0.475132	0.0355964	0.0716412	0.00104425
1-LysoPE(18:3)	C23H42NO7P	475.27	12.02	Lipids	0.119688	0.523555	1.06036	1.36974	3.00587	0.00417711	0.00982292	0.759724	0.458602	0.000603226	0.0111517	0.0205645	0.847049	0.570792	0.00312385
2-LysoPE(18:2)	C23H44NO7P	477.285	12.86	Lipids	0.162947	0.793008	2.24433	1.8607	2.0927	0.000106051	0.020182	0.017457	0.00203157	0.0042193	0.000857249	0.0371707	0.0457657	0.00709827	0.0133
1-LysoPE(18:2)	C23H44NO7P	477.285	13.22	Lipids	0.0789681	0.408685	1.78866	1.41015	1.54074	1.81214e-06	0.00126922	0.0631439	0.199307	0.0271901	7.53331e-05	0.00376879	0.134123	0.297934	0.0563223
2-LysoPE(18:1)	C23H46NO7P	479.301	14.35	Lipids	0.450117	1.21735	1.65602	1.46633	1.80593	0.0119958	0.377085	0.0403675	0.111037	0.00294726	0.0258576	0.477095	0.0924956	0.188308	0.00982419
1-LysoPE(18:1)	C23H46NO7P	479.301	14.71	Lipids	0.574261	0.914663	1.23051	1.00111	1.12226	0.00196433	0.547348	0.36233	0.972677	0.64085	0.00628154	0.65278	0.502085	0.982845	0.725963
phosphocholine	C5H15NO4P	184.073	1.72	Lipids	2.08352	1.69271	1.90815	3.23806	4.02973	0.0160167	0.000767721	0.902478	4.92323e-05	0.000113375	0.0325935	0.00262831	0.951526	0.000571094	0.00117425
3-hydroxy-3-methyl-Glutaric acid	C6H10O5	162.053	4.04	Lipids	2.51342	3.28985	0.492845	0.295524	0.203736	0.000316435	1.6231e-06	6.08102e-06	6.9575e-06	4.08642e-08	0.00143879	7.87203e-05	0.00029493	0.000224186	1.18506e-05
sn-Glycero-3-phosphocholine	C8H20NO6P	257.107	1.67	Lipids	0.620918	0.688652	0.553845	0.236369	0.216994	0.140803	2.42098e-05	0.272885	0.0049885	0.0176251	0.193273	0.000260928	0.413591	0.0143234	0.0378613
terpenyl-pentosyl-glucoside #1	C21H36O10	448.231	6.97	Monoterpenol glycoconjugation	1.02512	8.40032	1.58236	1.45026	0.566077	0.872715	0.000321747	0.00333241	0.00291239	0.000830368	0.903773	0.00151014	0.0131045	0.00918035	0.00382233
terpenyl-pentosyl-glucoside #2	C21H36O10	448.231	7.08	Monoterpenol glycoconjugation	0.957739	2.81028	0.916359	1.01757	0.698481	0.762368	6.60489e-06	0.318177	0.77305	0.0102651	0.818631	0.000128135	0.469997	0.839642	0.0242023
terpenyl-pentosyl-glucoside #3	C21H36O10	448.231	7.17	Monoterpenol glycoconjugation	1.26613	1.68032	0.85442	0.870046	0.706023	0.0520498	0.000216271	0.0700775	0.0155375	0.0140777	0.0870488	0.00110412	0.145661	0.0363376	0.0311644
uridine monophosphate (5' or 3')	C9H13N2O9P	324.036	1.88	Nucleotides	0.932659	1.07633	1.15113	1.19257	1.77495	0.0355728	0.610259	0.210967	0.286896	0.00505017	0.0635073	0.699155	0.337315	0.390609	0.0145005
uracil	C4H4N2O2	112.027	2.49	Nucleotides	2.4452	21.1127	0.933953	7.55485	7.52509	0.194163	9.67473e-05	0.926504	0.00746639	0.000995533	0.256825	0.00059901	0.962902	0.0196841	0.00430902
adenine	C5H5N5	135.055	2.44	Nucleotides	0.749681	0.917754	0.953648	1.16843	1.12925	0.0572287	0.563781	0.472934	0.0129142	0.182228	0.0951631	0.664211	0.59066	0.0306976	0.282599
adenosine	C10H13N5O4	267.097	3.9	Nucleotides	0.622707	0.581866	0.555549	1.06187	1.13649	0.00743612	0.0170489	0.0234319	0.8113	0.684171	0.0178836	0.0326397	0.0587817	0.871397	0.766061
inosine	C10H12N4O5	268.082	1.7	Nucleotides	0.400979	0.698416	2.14631	3.03619	3.22137	0.176674	0.776073	0.381573	0.0256502	0.438128	0.238019	0.821226	0.509347	0.0539025	0.552423
guanidine	CH5N3	59.048	1.55	Nucleotides	0.938703	1.30551	0.492251	0.798714	1.22507	0.654571	0.397813	0.339729	0.901107	0.564833	0.732615	0.496839	0.487001	0.943397	0.66049
adenosine 5'-monophosphate	C10H14N5O7P	347.063	2.49	Nucleotides	1.16849	1.14843	1.14734	1.09076	1.4116	0.0730401	0.21862	0.107779	0.443756	0.100142	0.11489	0.300087	0.209092	0.561962	0.169831
guanosine 5'-diphosphate	C10H15N5O11P2	443.024	1.72	Nucleotides	0.606398	0.788408	1.24919	0.706863	0.421858	0.218913	0.303285	0.829413	0.0118145	0.00457846	0.283127	0.399349	0.897246	0.0287916	0.0135485
cytosine	C4H5N3O	111.043	1.68	Nucleotides	1.03736	3.96907	1.77967	2.17229	2.30443	0.832773	1.21621e-05	0.789646	1.81546e-05	0.000118918	0.865489	0.000153878	0.863861	0.000404987	0.00111246
agmatine	C5H14N4	130.121	1.41	Nucleotides	2.38208	1.52549	1.02627	1.54424	1.98118	0.00855764	0.014286	0.938309	0.00207588	0.044501	0.0199222	0.0280894	0.971701	0.00716673	0.0854656
guanosine 5'- monophosphate (5'-GMP)	C10H14N5O8P	363.056	2.49	Nucleotides	1.47508	1.1161	1.24794	1.28673	1.36203	0.00716923	0.0302889	0.101926	0.000731093	0.00827384	0.0173854	0.0518475	0.199064	0.00321238	0.0216163
guanine	C5H5N5O	151.05	3.98	Nucleotides	11.329	0.600287	0.74555	0.961052	2.72122	5.99252e-05	0.0107687	0.195166	0.551288	0.00480451	0.000645861	0.0222248	0.320866	0.655219	0.0139331
hypoxanthine	C5H4N4O	136.038	3.07	Nucleotides	7.39126	1.42158	0.839483	1.1216	1.03366	0.00022723	0.000735505	0.458488	0.475156	0.814726	0.00127162	0.002548	0.575087	0.588869	0.856052
uridine	C9H12N2O6	244.071	3.62	Nucleotides	2.45451	33.2599	2.33586	1.97466	2.68054	0.00402433	0.000623011	0.00395495	0.0100318	0.00079688	0.0109447	0.0022662	0.014755	0.0257453	0.00372734
urate	C5H4N4O3	168.028	2.61	Nucleotides	9.31332	1.86108	3.06593	2.69499	2.7966	2.14651e-05	0.139826	5.70964e-05	0.000826257	0.000873948	0.000480489	0.196568	0.000722394	0.00357633	0.00396008
guanosine	C10H13N5O5	283.092	3.97	Nucleotides	13.7954	0.626636	0.873152	1.66038	3.20848	1.91817e-07	7.57406e-05	0.00159518	0.000252331	2.89363e-05	1.86062e-05	0.000500921	0.00703327	0.0015245	0.000524471
cytidine	C9H13N3O5	243.085	2.44	Nucleotides	4.07837	1.77133	1.19585	1.29188	2.07386	4.8955e-05	0.00719002	0.373557	0.157758	0.000348756	0.000619387	0.0153845	0.503264	0.244651	0.00240808
succinyladenosine	C14H17N5O8	383.107	4.43	Nucleotides	1.81322	0.97297	0.811574	0.672965	0.695605	0.000302392	0.672548	0.00715355	0.00137666	0.004577	0.00141929	0.746991	0.0231298	0.005395	0.0136838
2'-deoxycytidine	C9H13N3O4	227.091	1.56	Nucleotides	8.27893	2.20976	1.71401	2.29059	2.82451	0.00012785	0.00100783	0.915768	0.00018291	0.00795261	0.000907426	0.00318781	0.955156	0.00126295	0.020966
quinate	C7H12O6	192.064	1.89	Organic acids	0.941425	0.602625	0.440212	0.68802	0.572654	0.592441	6.89663e-05	0.139116	0.000290424	0.00161012	0.678741	0.000477838	0.249894	0.00161967	0.00648519
kynurenate	C10H7NO3	189.043	5.01	Organic acids	0.43853	0.972685	1.17797	1.18067	1.17844	0.000113025	0.746534	0.191918	0.244342	0.120176	0.000865536	0.798681	0.317318	0.34906	0.196898
propionic acid	C3H6O2	74.037	3.89	Organic acids	1.83905	0.632	0.580827	0.738063	0.517938	9.83865e-05	0.000673461	0.000231281	0.00249409	7.25062e-05	0.00086759	0.00238996	0.00168257	0.00821916	0.00100128
maleic acid	C4H4O4	116.011	2.19	Organic acids	0.994367	0.915266	0.926685	0.738549	0.743485	0.927755	0.0421119	0.162386	0.00682044	0.00603829	0.947286	0.0677048	0.274734	0.0184853	0.017001
malic acid	C4H6O5	134.022	2.19	Organic acids	0.985835	0.946953	1.00313	0.86092	0.83257	0.736665	0.316865	0.974797	0.046492	0.00699577	0.802882	0.41535	0.984951	0.0923471	0.0191394
4-Hydroxybutyric Acid	C4H8O3	104.047	4.1	Organic acids	1.78138	0.637989	0.798768	0.656674	0.485378	0.0455176	0.0320501	0.146561	0.00746069	0.00293531	0.078843	0.0542243	0.260056	0.0198495	0.00989815
3-oxoglutaric acid	C5H6O5	146.021	2.48	Organic acids	1.64929	0.412856	0.688336	0.423497	0.423877	8.80108e-06	1.42527e-05	0.000671769	7.52703e-05	7.50564e-06	0.000256112	0.000172814	0.00375932	0.000682137	0.000310948
aconitic acid	C6H6O6	174.016	3.13	Organic acids	1.42575	1.19598	0.971447	0.731059	0.619004	0.1383	0.02757	0.8415	0.000993532	0.000114471	0.190736	0.0489199	0.903604	0.00417571	0.00110656
salicylic acid	C7H6O3	138.031	7.69	Organic acids	0.981495	1.00859	1.02288	1.07217	1.05418	0.761024	0.955959	0.880294	0.310637	0.621178	0.820214	0.979521	0.931511	0.417059	0.712023
phenoxyacetic acid	C8H8O3	152.047	7.32	Organic acids	0.983994	1.33941	1.17247	1.06759	1.00679	0.809461	0.0590254	0.171217	0.58347	0.941484	0.844276	0.0894604	0.28471	0.685046	0.958002
azelaic acid	C9H16O4	188.105	6.85	Organic acids	0.890612	1.03628	1.00079	1.08767	1.06307	0.093762	0.696449	0.973386	0.705175	0.684895	0.139922	0.767677	0.986952	0.798831	0.760995
indole-3-carbaldehyde	C9H7NO	145.051	7.16	Organic acids	0.780969	1.1778	1.54454	1.17072	1.10333	0.0246793	0.589096	0.0218275	0.508288	0.819831	0.046939	0.682976	0.0557175	0.616752	0.858307
phospho-diglucose	C12H25O15P	440.088	1.8	Others	2.14577	1.51322	1.40074	1.3384	1.17814	0.000420993	0.00361844	0.022494	0.0234483	0.161598	0.00177549	0.00870219	0.0569195	0.0507462	0.256084
N,N'-Dicyclohexylurea	C13H24N2O	224.189	10.51	Others	0.946559	0.98276	1.07245	1.04058	1.00386	0.411378	0.759133	0.585157	0.644473	0.988696	0.500882	0.809186	0.686616	0.741656	0.992117
dodecyl (dimethyl) amine oxide	C14H31NO	229.241	9.22	Others	1.06971	1.02502	1.4186	1.01551	1.06601	0.658127	0.790426	0.32665	0.889477	0.916997	0.733773	0.833384	0.475276	0.937994	0.943011
2-Amino-1,3,4-tetradecanetriol	C14H31NO3	261.231	6.64	Others	1.26861	1.01464	0.832049	0.819208	0.722408	0.527799	0.830578	0.672522	0.398962	0.0387407	0.616825	0.863208	0.776603	0.514218	0.0759108
tetrabutylammonium	C16H36N	242.28	8.64	Others	1.04924	0.930358	1.1748	0.913156	0.981163	0.560259	0.805236	0.130674	0.511771	0.848693	0.646965	0.845934	0.237663	0.615824	0.882154
2-Amino-1,3-octadecanediol	C18H39NO2	301.299	10.8	Others	1.12613	1.26269	1.59725	1.03253	0.910691	0.504541	0.334651	0.036059	0.724963	0.451674	0.596835	0.434748	0.0846224	0.80244	0.567037
2-Amino-1,3-eicosanediol	C20H43NO2	329.33	12.48	Others	1.18731	1.66077	2.24589	1.08775	1.22527	0.398813	0.163336	0.00958715	0.511003	0.299868	0.487624	0.225264	0.0299985	0.617462	0.410197
2-Amino-1,3,4,5-eicosanetetrol	C20H43NO4	361.318	9.26	Others	1.13037	1.04064	1.00587	0.897908	0.735427	0.743102	0.706477	0.8717	0.608552	0.0069544	0.806876	0.76998	0.925783	0.711613	0.0192074
formyltetrahydrofolate	C20H23N7O7	473.168	4.69	Pteridines and derivatives	1.2054	1.24659	1.27271	1.13331	1.21061	0.0959827	0.0394194	0.158445	0.277879	0.00210075	0.141782	0.0648082	0.269635	0.380117	0.00733998
trans-resveratrol 3-O-glucoside	C20H22O8	390.131	6.06	Stilbenes	0.997678	0.692836	0.78189	1.10815	0.251336	0.932359	0.222495	0.120011	0.0109365	0.0020583	0.948659	0.302551	0.228257	0.0273413	0.00727934

## Sheet: Table S4
Table S4 The sub-class list of flavonoids
Sub-class name	Metabolites name	Class	KEGG ID
anthocyanidins	cyanidin 3-O-(6''-caffeoyl-glucoside) #1	Flavonoids	C16369
anthocyanidins	cyanidin 3-O-(6''-caffeoyl-glucoside) #2	Flavonoids	C16369
anthocyanidins	cyanidin-3-O-glucoside #1	Flavonoids	C08604
anthocyanidins	cyanidin-3-O-glucoside #2	Flavonoids	C08604
anthocyanidins	cyanidin-3-O-glucoside #3	Flavonoids	C08604
anthocyanidins	delphinidin 3,5-diglucoside	Flavonoids	C16312
anthocyanidins	delphinidin 3-O-glucoside #1	Flavonoids	C12138
anthocyanidins	delphinidin 3-O-glucoside #2	Flavonoids	C12138
anthocyanidins	delphinidin-3-O-(6''-O-alpha-rhamnopyranosyl-beta-glucopyranoside)	Flavonoids	/
anthocyanidins	malvidin 3-O-(6-O-coumaryl)-glucoside	Flavonoids	/
anthocyanidins	peonidin 3-O-(6-O-coumaryl)-glucoside	Flavonoids	/
anthocyanidins	petunidin 3-glucoside	Flavonoids	C12139
flavonols and dihydroflavonols	astilbin #1	Flavonoids	C17449
flavonols and dihydroflavonols	astilbin #2	Flavonoids	C17449
flavonols and dihydroflavonols	astilbin #3	Flavonoids	C17449
flavonols and dihydroflavonols	dihydroquercetin	Flavonoids	C12316
flavonols and dihydroflavonols	dihydroquercetin-O-hexoside #1	Flavonoids	/
flavonols and dihydroflavonols	dihydroquercetin-O-hexoside #2	Flavonoids	/
flavonols and dihydroflavonols	isorhamnetin	Flavonoids	C10084
flavonols and dihydroflavonols	isorhamnetin-O-rhamnoside	Flavonoids	/
flavonols and dihydroflavonols	kaempferol-3-O-glucoside	Flavonoids	C12249
flavonols and dihydroflavonols	kaempferol-3-O-rhamnoside	Flavonoids	C16911
flavonols and dihydroflavonols	kaempferol-3-O-rhamnoside-7-O-rhamnoside	Flavonoids	C16981
flavonols and dihydroflavonols	kaempferol-7-O-rhamnoside	Flavonoids	/
flavonols and dihydroflavonols	morin	Flavonoids	C10105
flavonols and dihydroflavonols	myricetin-3-O-glucuronide #1	Flavonoids	/
flavonols and dihydroflavonols	myricetin-3-O-hexoside #1	Flavonoids	/
flavonols and dihydroflavonols	myricetin-3-O-hexoside #2	Flavonoids	/
flavonols and dihydroflavonols	quercetin	Flavonoids	C00389
flavonols and dihydroflavonols	quercetin 3-D-galactoside	Flavonoids	C10073
flavonols and dihydroflavonols	quercetin-3-O-rhamnoside #1	Flavonoids	C01750
flavonols and dihydroflavonols	quercetin-3-O-rhamnoside #2	Flavonoids	C01750
flavonols and dihydroflavonols	quercetin-3-O-rutinoside #2	Flavonoids	C05625
flavonols and dihydroflavonols	rhamnetin	Flavonoids	C10176
flavonols and dihydroflavonols	rutin	Flavonoids	C05625
flavonols and dihydroflavonols	syringetin 3-O-β-D-glucopyranoside	Flavonoids	/
Flavanol	procyanidin dimer B1	Flavonoids	/
Flavanol	procyanidin dimer B2	Flavonoids	C17639
Flavanol	procyanidin dimer B3	Flavonoids	/
Flavanol	procyanidin dimer B4	Flavonoids	C10238
Flavanol	procyanidin dimer B5	Flavonoids	C17640
Flavanol	procyanidin-O-gallate #1	Flavonoids	/
Flavanol	procyanidin-O-gallate #2	Flavonoids	/
Flavanol	Catechin	Flavonoids	C06562
Flavanol	Epicatechin	Flavonoids	C09727
Flavanol	epicatechin gallate	Flavonoids	/
Flavanol	epigallocatechin	Flavonoids	C12136
Flavanol	Luteoforol	Flavonoids	C05907
Flavanones	naringenin	Flavonoids	C00509
Flavanones	naringenin chalcone	Flavonoids	C06561
Flavanones	naringenin chalcone hexoside	Flavonoids	C16407
Flavanones	naringenin chalcone-C-pentoside-O-hexoside	Flavonoids	/
Flavanones	Cha-2'O-glu	Flavonoids	C16406
Flavanones	eriodictyol	Flavonoids	C05631
Flavones	apigenin 6-C-α-L-arabinosyl-8-C-β-L-arabinoside	Flavonoids	/
Flavones	chrysoeriol C-glucoside #1	Flavonoids	C05990
Flavones	chrysoeriol C-glucoside #2	Flavonoids	C05990
Flavones	chrysoeriol-C-hexosyl-methyl	Flavonoids	/
Flavones	chrysoeriol-O-hexoside	Flavonoids	/
Flavones	isoorientin	Flavonoids	C01821
Flavones	isoorientin 7,3'-dimethyl ether	Flavonoids	/
Flavones	isoorientin-7,2''-di-O-glucoside	Flavonoids	/
Flavones	isoscoparin	Flavonoids	C05990
Flavones	isoscoparin 2''-O-(6'''-(E)-feruloyl)-glucopyranoside	Flavonoids	/
Flavones	isovitexin	Flavonoids	C01714
Flavones	luteolin 7-O-glucoside	Flavonoids	C03951
Flavones	luteolin-di-pentoside	Flavonoids	/
Flavones	swertisin	Flavonoids	C17835
Flavones	swertisin	Flavonoids	C17835
Flavones	trcin O-glucoside O-guaiacylglyceryl ether	Flavonoids	/
Flavones	tricin 4'-O-(syringyl alcohol)ether O-hexoside	Flavonoids	/
Flavones	tricin 7-O-neohesperidoside	Flavonoids	/
Flavones	tricin 7-O-β-D-glucopyranoside	Flavonoids	/
